# Supplementary material for: The malaria parasite sheddase SUB2 governs host red blood cell membrane sealing at invasion
Source: eLife. 2020 Dec 8;9:e61121. doi: 10.7554/eLife.61121 (PMC7723409; doi:10.7554/eLife.61121)
Supplement: Figure 3—source data 1. — Established merozoite surface proteins are shown in blue, whilst other proteins possessing predicted secretory signal peptides are in red. Data shown are from three technical replicates. Proteomics data are also available via ProteomeXchange (Deutsch et al., 2020) with dataset identifier PXD021843. [file elife-61121-fig3-data1.xlsx]

## Sheet: Sheet1
	iBAQ DMSO_WT (log2)_x-y_iBAQ RAP_KOSUB2 (log2)	iBAQ DMSO_WT (log2)	iBAQ RAP_KOSUB2 (log2)	iBAQ (log10)	Intensity (log10)	Q-value	Score	MS/MS count	Razor + unique peptides DMSO_WT	Razor + unique peptides RAP_KOSUB2	Unique peptides DMSO_WT	Unique peptides RAP_KOSUB2	Protein IDs	Majority protein IDs	Protein names	Gene names	Fasta headers
700	5.29802	-1.85773	-7.15575	5.56404	7.51828	0.004329	2.8535	4	1	1	1	1	PF3D7_0216000	PF3D7_0216000			0216000.1 0216000 DEAD/DEAH box helicase, putative DEAD/DEAH box helicase, putative Pf3D7_02_v3:658636-664629(+) 1997
699	4.9575	0.282715	-4.67478	6.21376	7.9772	0	163.69	10	6	1	6	1	PF3D7_1136900	PF3D7_1136900			1136900.1 1136900 subtilisin-like protease 2 subtilisin-like protease 2 Pf3D7_11_v3:1456151-1460319(+) 1341
698	4.87078	0.37973	-4.49105	6.24455	7.19879	0	4.5217	1	2	1	2	1	PF3D7_0207000	PF3D7_0207000			0207000.1 0207000 merozoite surface protein 4 merozoite surface protein 4 Pf3D7_02_v3:277494-278456(-) 272
697	4.7212	-0.592195	-5.3134	5.92406	7.15452	0.0036496	3.3549	1	1	0	1	0	PF3D7_0206900.2;PF3D7_0206900	PF3D7_0206900.2;PF3D7_0206900			0206900.2 0206900 merozoite surface protein 5 merozoite surface protein 5 Pf3D7_02_v3:275540-276577(-) 261;0206900.1 0206900 merozoite surface protein 5 merozoite surface protein 5 Pf3D7_02_v3:275540-276494(-) 272
696	4.61029	4.39873	-0.211561	7.45972	9.08296	0	192.41	132	54	27	54	27	PF3D7_1364100	PF3D7_1364100			1364100.1 1364100 6-cysteine protein 6-cysteine protein Pf3D7_13_v3:2568556-2570946(+) 796
695	4.37265	-2.52902	-6.90167	5.37996	6.61039	0	7.2824	3	1	2	1	2	PF3D7_0413700	PF3D7_0413700			0413700.1 0413700 lysine decarboxylase-like protein, putative lysine decarboxylase-like protein, putative Pf3D7_04_v3:619786-620802(-) 338
694	3.98428	0.0520535	-3.93222	6.16829	7.39876	0	8.3127	6	5	3	5	3	PF3D7_1334800	PF3D7_1334800			1334800.1 1334800 MSP7-like protein MSP7-like protein Pf3D7_13_v3:1413102-1413947(-) 281
693	3.74907	-1.78978	-5.53885	5.56355	6.56355	0.0035119	2.9512	1	1	0	1	0	PF3D7_0915600	PF3D7_0915600			0915600.1 0915600 conserved Plasmodium protein, unknown function conserved Plasmodium protein, unknown function Pf3D7_09_v3:660176-660892(+) 238
692	3.46218	-3.0614	-6.52359	5.18076	6.84351	0	7.4387	2	2	0	2	0	PF3D7_1203400	PF3D7_1203400			1203400.1 1203400 major facilitator superfamily domain-containing protein, putative major facilitator superfamily domain-containing protein, putative Pf3D7_12_v3:178162-181914(+) 1250
691	3.32828	0.249445	-3.07883	6.25421	7.50948	0	7.8674	7	4	2	4	2	PF3D7_1404700	PF3D7_1404700			1404700.1 1404700 conserved Plasmodium protein, unknown function conserved Plasmodium protein, unknown function Pf3D7_14_v3:161227-162099(-) 290
690	3.19353	1.50517	-1.68835	6.63906	7.41721	0	5.9242	4	2	2	2	2	PF3D7_0725400	PF3D7_0725400			0725400.1 0725400 conserved Plasmodium protein, unknown function conserved Plasmodium protein, unknown function Pf3D7_07_v3:1079015-1080055(+) 109
689	3.17081	0.358906	-2.8119	6.29522	7.61743	0	14.649	8	5	2	5	2	PF3D7_1218000	PF3D7_1218000			1218000.1 1218000 thrombospondin-related apical membrane protein thrombospondin-related apical membrane protein Pf3D7_12_v3:703895-704953(+) 352
688	2.96928	9.57231	6.60304	9.08012	10.9375	0	323.31	761	194	159	194	159	PF3D7_0930300;PF3D7_1312000	PF3D7_0930300			0930300.1 0930300 merozoite surface protein 1 merozoite surface protein 1 Pf3D7_09_v3:1201812-1206974(+) 1720
687	2.95254	3.59948	0.646936	7.28314	8.36231	0.0034934	2.9196	1	1	1	1	1	PF3D7_0206800	PF3D7_0206800			0206800.1 0206800 merozoite surface protein 2 merozoite surface protein 2 Pf3D7_02_v3:273689-274507(-) 272
686	2.94799	4.26283	1.31485	7.48309	8.73836	0	58.435	47	17	12	17	12	PF3D7_1335100	PF3D7_1335100			1335100.1 1335100 merozoite surface protein 7 merozoite surface protein 7 Pf3D7_13_v3:1419086-1420141(-) 351
685	2.92368	-3.41527	-6.33895	5.17324	6.2872	0	5.071	2	1	1	1	1	PF3D7_1327600	PF3D7_1327600			1327600.1 1327600 nicotinate-nucleotide adenylyltransferase nicotinate-nucleotide adenylyltransferase Pf3D7_13_v3:1159366-1159980(+) 204
684	2.8748	-0.510393	-3.38519	6.05073	7.39315	0	6.4438	3	2	1	2	1	PF3D7_1136200	PF3D7_1136200			1136200.1 1136200 conserved Plasmodium protein, unknown function conserved Plasmodium protein, unknown function Pf3D7_11_v3:1417466-1420071(-) 679
683	2.74078	2.30554	-0.435244	6.90717	7.60614	0	11.166	10	4	3	4	3	PF3D7_1121600	PF3D7_1121600			1121600.1 1121600 exported protein 1 exported protein 1 Pf3D7_11_v3:815386-816322(-) 162
682	2.71805	-5.2551	-7.97315	3.9906	5.67184	0.0035088	2.9486	1	0	1	0	1	PF3D7_0528100	PF3D7_0528100			0528100.1 0528100 AP-1 complex subunit beta, putative AP-1 complex subunit beta, putative Pf3D7_05_v3:1157840-1161553(-) 929
681	2.46063	-5.01611	-7.47674	4.72362	5.97889	0.0076207	2.6368	2	1	1	1	1	PF3D7_1027800	PF3D7_1027800			1027800.1 1027800 60S ribosomal protein L3 60S ribosomal protein L3 Pf3D7_10_v3:1153271-1154431(-) 386
680	2.4576	-2.91452	-5.37212	5.22497	6.3711	0	4.8671	2	2	0	2	0	PF3D7_0102700	PF3D7_0102700			0102700.1 0102700 merozoite-associated tryptophan-rich antigen merozoite-associated tryptophan-rich antigen Pf3D7_01_v3:124517-125484(+) 276
679	2.40513	-6.91781	-9.32294	4.15555	6.8413	0.0067912	2.6795	2	2	1	2	1	PF3D7_0511500	PF3D7_0511500			0511500.1 0511500 RNA pseudouridylate synthase, putative RNA pseudouridylate synthase, putative Pf3D7_05_v3:486602-516787(+) 10061
678	2.38332	5.70361	3.32028	7.95676	9.2578	0	113.23	67	22	14	22	14	PF3D7_1035400	PF3D7_1035400			1035400.1 1035400 merozoite surface protein 3 merozoite surface protein 3 Pf3D7_10_v3:1404195-1405259(+) 354
677	2.37444	-3.41357	-5.78801	5.07474	6.70823	0.0036265	3.2945	1	1	0	1	0	PF3D7_0405900	PF3D7_0405900			0405900.1 0405900 apical sushi protein apical sushi protein Pf3D7_04_v3:316540-319178(-) 731
676	2.35273	-3.24935	-5.60208	5.26418	7.14498	0	17.795	16	7	6	7	6	PF3D7_0302200	PF3D7_0302200			0302200.1 0302200 cytoadherence linked asexual protein 3.2 cytoadherence linked asexual protein 3.2 Pf3D7_03_v3:119458-124735(+) 1416
675	2.34018	-4.67125	-7.01143	NaN	NaN	0	27.577	1	0	1	0	1	PF3D7_1123900	PF3D7_1123900			1123900.1 1123900 splicing factor, putative splicing factor, putative Pf3D7_11_v3:945470-946148(+) 145
674	2.24114	5.03061	2.78947	7.7662	8.9423	0	105.25	54	20	17	20	17	PF3D7_1035500	PF3D7_1035500			1035500.1 1035500 merozoite surface protein 6 merozoite surface protein 6 Pf3D7_10_v3:1407276-1408391(+) 371
673	2.20484	4.73286	2.52802	7.67978	9.15691	0	123.84	42	16	12	16	12	PF3D7_0707300	PF3D7_0707300			0707300.1 0707300 rhoptry-associated membrane antigen rhoptry-associated membrane antigen Pf3D7_07_v3:338885-342083(+) 861
672	2.1811	-5.57916	-7.76025	4.05469	5.37692	0.0051326	2.752	1	0	1	0	1	PF3D7_0212900	PF3D7_0212900			0212900.1 0212900 leucyl/phenylalanyl-tRNA--protein transferase, putative leucyl/phenylalanyl-tRNA--protein transferase, putative Pf3D7_02_v3:533253-534350(+) 365
671	2.0721	0.194923	-1.87717	6.32595	7.47208	0	9.9926	8	4	3	4	3	PF3D7_1349100	PF3D7_1349100			1349100.1 1349100 nucleoside diphosphate hydrolase, putative nucleoside diphosphate hydrolase, putative Pf3D7_13_v3:1969769-1970752(-) 196
670	1.91768	-6.57681	-8.49449	3.83366	5.54123	0.0034843	2.9074	2	0	1	0	1	PF3D7_0905900	PF3D7_0905900			0905900.1 0905900 coatomer subunit beta, putative coatomer subunit beta, putative Pf3D7_09_v3:293585-296617(-) 1010
669	1.91521	-2.68118	-4.59639	5.47567	6.93806	0.0091286	2.4714	2	1	1	1	1	PF3D7_0526200.2;PF3D7_0526200	PF3D7_0526200.2;PF3D7_0526200			0526200.2 0526200 ADP-ribosylation factor GTPase-activating protein, putative ADP-ribosylation factor GTPase-activating protein, putative Pf3D7_05_v3:1081558-1083816(-) 505;0526200.1 0526200 ADP-ribosylation factor GTPase-activating protein, putativ
668	1.8627	1.79796	-0.0647373	6.82945	7.52842	0	6.466	5	3	2	3	2	PF3D7_0810000	PF3D7_0810000			0810000.1 0810000 acyl-CoA binding protein, putative acyl-CoA binding protein, putative Pf3D7_08_v3:517421-517693(-) 90
667	1.85022	-1.56402	-3.41423	5.8187	6.6638	0	4.772	2	2	1	2	1	PF3D7_0716400	PF3D7_0716400			0716400.1 0716400 transcription initiation factor IIA subunit 1, putative transcription initiation factor IIA subunit 1, putative Pf3D7_07_v3:720010-721467(+) 174
666	1.79811	-3.18005	-4.97816	5.33778	6.41697	0.00093545	3.7427	3	2	1	2	1	PF3D7_0402400	PF3D7_0402400			0402400.1 0402400 Plasmodium exported protein, unknown function Plasmodium exported protein, unknown function Pf3D7_04_v3:147490-148380(-) 254
665	1.75236	0.897263	-0.855102	6.57017	7.80061	0	11.869	9	4	5	4	5	PF3D7_0715000	PF3D7_0715000			0715000.1 0715000 4-nitrophenylphosphatase 4-nitrophenylphosphatase Pf3D7_07_v3:673451-674419(+) 322
664	1.71421	5.22478	3.51057	7.87712	9.13239	0	85.524	32	7	8	7	8	PF3D7_0202000	PF3D7_0202000			0202000.1 0202000 knob-associated histidine-rich protein knob-associated histidine-rich protein Pf3D7_02_v3:103385-105796(-) 654
663	1.70598	-0.840887	-2.54686	6.05208	7.16605	0	8.8625	5	2	3	2	3	PF3D7_1347200	PF3D7_1347200			1347200.1 1347200 nucleoside transporter 1 nucleoside transporter 1 Pf3D7_13_v3:1889853-1891121(-) 422
662	1.66915	-1.6632	-3.33235	5.80872	7.42151	0	15.02	4	3	2	3	2	PF3D7_0214900	PF3D7_0214900			0214900.1 0214900 rhoptry neck protein 6 rhoptry neck protein 6 Pf3D7_02_v3:610625-615372(+) 950
661	1.64877	-0.049511	-1.69828	6.29684	7.33824	0	33.584	12	3	4	3	4	PF3D7_0721100	PF3D7_0721100			0721100.1 0721100 conserved Plasmodium protein, unknown function conserved Plasmodium protein, unknown function Pf3D7_07_v3:916434-917168(+) 244
660	1.59361	-1.9792	-3.57281	5.72236	7.49321	0	31.354	18	10	11	10	11	PF3D7_0801800	PF3D7_0801800			0801800.1 0801800 mannose-6-phosphate isomerase, putative mannose-6-phosphate isomerase, putative Pf3D7_08_v3:119032-122067(-) 1011
659	1.52988	0.893831	-0.636049	6.59485	7.67403	0	5.0502	4	2	3	2	3	PF3D7_0817500	PF3D7_0817500			0817500.1 0817500 protein kinase c inhibitor-like protein, putative protein kinase c inhibitor-like protein, putative Pf3D7_08_v3:798777-800205(+) 185
658	1.51201	2.54245	1.03045	7.09332	8.29743	0	23.368	17	10	11	10	11	PF3D7_0832200;PF3D7_0832200.2	PF3D7_0832200;PF3D7_0832200.2			0832200.1 0832200 Plasmodium exported protein (PHISTa-like), unknown function Plasmodium exported protein (PHISTa-like), unknown function Pf3D7_08_v3:1392168-1393135(+) 286;0832200.2 0832200 Plasmodium exported protein (PHISTa-like), unknown functio
657	1.49801	-4.58925	-6.08725	4.94816	6.02735	0.0043141	2.8137	2	1	1	1	1	PF3D7_1201200	PF3D7_1201200			1201200.1 1201200 Plasmodium exported protein (PHISTa-like), unknown function Plasmodium exported protein (PHISTa-like), unknown function Pf3D7_12_v3:89934-90749(+) 221
656	1.49781	-4.68683	-6.18465	4.91881	6.41017	0	9.2257	5	3	2	3	2	PF3D7_1030600	PF3D7_1030600			1030600.1 1030600 tRNA N6-adenosine threonylcarbamoyltransferase tRNA N6-adenosine threonylcarbamoyltransferase Pf3D7_10_v3:1245880-1247676(-) 598
655	1.47262	4.45209	2.97946	7.673	9.13539	0	155.88	42	22	20	22	20	PF3D7_1133400	PF3D7_1133400			1133400.1 1133400 apical membrane antigen 1 apical membrane antigen 1 Pf3D7_11_v3:1293856-1295724(+) 622
654	1.34316	-1.05623	-2.39939	6.03133	7.20739	0	9.2842	4	3	2	3	2	PF3D7_1216500	PF3D7_1216500			1216500.1 1216500 male development gene 1 male development gene 1 Pf3D7_12_v3:657339-658004(-) 221
653	1.34104	-3.27737	-4.61841	5.36295	7.01616	0	7.1908	4	3	3	3	3	PF3D7_0627800	PF3D7_0627800			0627800.1 0627800 acetyl-CoA synthetase, putative acetyl-CoA synthetase, putative Pf3D7_06_v3:1114544-1117537(-) 997
652	1.33102	-1.05727	-2.38829	6.03258	7.73156	0	12.149	7	5	4	5	4	PF3D7_1404800	PF3D7_1404800			1404800.1 1404800 conserved Plasmodium protein, unknown function conserved Plasmodium protein, unknown function Pf3D7_14_v3:163990-166854(-) 954
651	1.27899	-3.89806	-5.17705	5.18432	6.2257	0.0083264	2.5047	2	2	1	2	1	PF3D7_1004000	PF3D7_1004000			1004000.1 1004000 60S ribosomal protein L13, putative 60S ribosomal protein L13, putative Pf3D7_10_v3:179344-180226(-) 202
650	1.2726	1.18192	-0.0906792	6.71439	8.16155	0	162.83	8	5	6	5	6	PF3D7_0702300	PF3D7_0702300			0702300.1 0702300 sporozoite threonine and asparagine-rich protein sporozoite threonine and asparagine-rich protein Pf3D7_07_v3:96761-98730(+) 594
649	1.25452	1.35102	0.0964966	6.76773	7.91387	0	12.277	10	4	4	4	4	PF3D7_1424100	PF3D7_1424100			1424100.1 1424100 60S ribosomal protein L5, putative 60S ribosomal protein L5, putative Pf3D7_14_v3:973853-975543(-) 294
648	1.22955	-0.756783	-1.98634	6.13663	7.28274	0	27.006	10	5	3	5	3	PF3D7_0104500	PF3D7_0104500			0104500.1 0104500 conserved protein, unknown function conserved protein, unknown function Pf3D7_01_v3:204622-205455(-) 277
647	1.20511	2.54189	1.33678	7.13296	8.33708	0	67.677	24	11	7	11	7	PF3D7_1033200	PF3D7_1033200			1033200.1 1033200 early transcribed membrane protein 10.2 early transcribed membrane protein 10.2 Pf3D7_10_v3:1335222-1336289(+) 355
646	1.19913	-4.27205	-5.47118	5.08257	5.86073	0.00094607	3.9359	2	1	1	1	1	PF3D7_1310700	PF3D7_1310700			1310700.1 1310700 RNA-binding protein, putative RNA-binding protein, putative Pf3D7_13_v3:468232-468663(-) 143
645	1.17149	0.583328	-0.588163	6.54803	7.80331	0	17.411	7	4	2	4	2	PF3D7_0508000	PF3D7_0508000			0508000.1 0508000 6-cysteine protein 6-cysteine protein Pf3D7_05_v3:328666-329715(-) 349
644	1.15174	-2.01487	-3.16662	5.76867	7.11109	0	4.513	2	1	1	1	1	PF3D7_1035600	PF3D7_1035600			1035600.1 1035600 merozoite surface protein merozoite surface protein Pf3D7_10_v3:1409281-1410555(+) 424
643	1.14478	-1.64213	-2.78691	5.88184	7.63772	0	15.816	7	5	3	5	3	PF3D7_0310400	PF3D7_0310400			0310400.1 0310400 parasite-infected erythrocyte surface protein parasite-infected erythrocyte surface protein Pf3D7_03_v3:447500-451384(+) 1294
642	1.12464	-5.30837	-6.43301	NaN	NaN	0.0090684	2.4064	1	0	1	0	1	PF3D7_1105000	PF3D7_1105000			1105000.1 1105000 histone H4 histone H4 Pf3D7_11_v3:221818-222129(-) 103
641	1.10082	2.28328	1.18245	7.06974	7.67181	0	12.866	11	2	3	2	3	PF3D7_0202500	PF3D7_0202500			0202500.1 0202500 early transcribed membrane protein 2 early transcribed membrane protein 2 Pf3D7_02_v3:127994-128314(+) 106
640	1.07958	2.47219	1.39261	7.12966	8.33379	0	175.9	29	13	11	13	11	PF3D7_0807500	PF3D7_0807500			0807500.1 0807500 proteasome subunit alpha type-6, putative proteasome subunit alpha type-6, putative Pf3D7_08_v3:387219-388364(+) 260
639	1.07873	-0.40514	-1.48388	6.26364	7.49407	0.0034783	2.8949	1	1	1	1	1	PF3D7_1013800	PF3D7_1013800			1013800.1 1013800 conserved Plasmodium protein, unknown function conserved Plasmodium protein, unknown function Pf3D7_10_v3:542359-544779(+) 486
638	1.04892	-1.52896	-2.57788	5.92965	7.34463	0	5.7358	3	2	3	2	3	PF3D7_1253000	PF3D7_1253000			1253000.1 1253000 gametocyte erythrocyte cytosolic protein gametocyte erythrocyte cytosolic protein Pf3D7_12_v3:2168181-2169759(+) 469
637	1.04806	-0.40801	-1.45607	6.26722	7.41335	0	12.492	10	3	4	2	3	PF3D7_1144900	PF3D7_1144900			1144900.1 1144900 ras-related protein Rab-6 ras-related protein Rab-6 Pf3D7_11_v3:1777525-1778928(-) 207
636	1.02638	1.31908	0.292698	6.7903	8.06904	0	12.37	12	5	6	5	6	PF3D7_1032800	PF3D7_1032800			1032800.1 1032800 leucine-rich repeat protein leucine-rich repeat protein Pf3D7_10_v3:1313255-1314721(-) 309
635	1.02404	3.31633	2.29229	7.39187	8.71409	0	41.819	39	14	13	14	13	PF3D7_0612700	PF3D7_0612700			0612700.1 0612700 6-cysteine protein 6-cysteine protein Pf3D7_06_v3:525987-527030(-) 347
634	1.00061	0.413412	-0.587194	6.52146	7.77674	0	9.9166	10	4	4	4	4	PF3D7_1426200	PF3D7_1426200			1426200.1 1426200 protein arginine N-methyltransferase 1 protein arginine N-methyltransferase 1 Pf3D7_14_v3:1021652-1022857(-) 401
633	0.994654	0.120859	-0.873795	6.43428	8.29761	0	165.16	113	37	40	37	40	PF3D7_0220800	PF3D7_0220800			0220800.1 0220800 cytoadherence linked asexual protein 2 cytoadherence linked asexual protein 2 Pf3D7_02_v3:838843-844116(+) 1440
632	0.93417	4.62728	3.69311	7.79993	9.14236	0	76.092	53	19	17	19	17	PF3D7_0104200	PF3D7_0104200			0104200.1 0104200 StAR-related lipid transfer protein StAR-related lipid transfer protein Pf3D7_01_v3:182822-184222(-) 466
631	0.924632	-5.82662	-6.75125	4.65446	5.90972	0.0034996	2.9238	2	1	1	1	1	PF3D7_0204700	PF3D7_0204700			0204700.1 0204700 hexose transporter hexose transporter Pf3D7_02_v3:205889-207403(-) 504
630	0.905562	-5.14891	-6.05447	NaN	NaN	0.003518	2.971	1	0	1	0	1	PF3D7_1002700	PF3D7_1002700			1002700.1 1002700 conserved Plasmodium protein, unknown function conserved Plasmodium protein, unknown function Pf3D7_10_v3:129276-132110(+) 944
629	0.876501	0.304476	-0.572025	6.50749	7.20645	0	6.2086	3	1	1	1	1	PF3D7_1401400	PF3D7_1401400			1401400.1 1401400 early transcribed membrane protein 14.1 early transcribed membrane protein 14.1 Pf3D7_14_v3:53411-53734(-) 107
628	0.875429	4.16963	3.2942	7.67117	8.99339	0	39.449	28	11	11	11	11	PF3D7_1012200	PF3D7_1012200			1012200.1 1012200 rhoptry associated adhesin rhoptry associated adhesin Pf3D7_10_v3:470979-471933(+) 267
627	0.851603	-2.42204	-3.27364	5.69059	6.96934	0	4.2643	3	1	2	1	2	PF3D7_1001100	PF3D7_1001100			1001100.1 1001100 acyl-CoA binding protein, isoform 1, ACBP1 acyl-CoA binding protein, isoform 1, ACBP1 Pf3D7_10_v3:67807-68961(-) 313
626	0.84072	-4.71332	-5.55404	5.00255	5.95678	0	5.2776	2	2	2	2	2	PF3D7_1248500	PF3D7_1248500			1248500.1 1248500 bax inhibitor 1, putative bax inhibitor 1, putative Pf3D7_12_v3:1983480-1984349(-) 289
625	0.837026	-6.36152	-7.19854	4.50696	6.17906	0	5.2176	5	2	1	2	1	PF3D7_1143800	PF3D7_1143800			1143800.1 1143800 conserved Plasmodium protein, unknown function conserved Plasmodium protein, unknown function Pf3D7_11_v3:1748439-1751138(+) 899
624	0.829475	4.89958	4.0701	7.89808	8.50014	0	131.97	29	6	5	6	5	PF3D7_0532100	PF3D7_0532100			0532100.1 0532100 early transcribed membrane protein 5 early transcribed membrane protein 5 Pf3D7_05_v3:1301224-1301769(+) 181
623	0.82839	0.760706	-0.0676842	6.65232	7.88277	0	31.02	14	5	4	5	4	PF3D7_1252200	PF3D7_1252200			1252200.1 1252200 chitinase chitinase Pf3D7_12_v3:2125435-2126571(+) 378
622	0.8048	3.15012	2.34532	7.37533	8.73707	0	57.885	41	21	16	21	16	PF3D7_0423800	PF3D7_0423800			0423800.1 0423800 cysteine-rich protective antigen cysteine-rich protective antigen Pf3D7_04_v3:1076347-1077534(+) 362
621	0.804474	-0.100292	-0.904766	6.39691	7.79486	0	11.736	8	4	5	4	5	PF3D7_1408100	PF3D7_1408100			1408100.1 1408100 plasmepsin III plasmepsin III Pf3D7_14_v3:297468-298823(+) 451
620	0.802822	-1.53426	-2.33709	5.96551	7.07943	0	5.6316	4	2	2	2	2	PF3D7_0831400	PF3D7_0831400			0831400.1 0831400 Plasmodium exported protein, unknown function Plasmodium exported protein, unknown function Pf3D7_08_v3:1344405-1345487(-) 302
619	0.795649	2.9368	2.14115	7.31258	8.51669	0	26.645	14	4	4	4	4	PF3D7_0402000	PF3D7_0402000			0402000.1 0402000 Plasmodium exported protein (PHISTa), unknown function Plasmodium exported protein (PHISTa), unknown function Pf3D7_04_v3:114601-116058(-) 428
618	0.79427	-3.43881	-4.23308	5.39354	6.47271	0	12.06	7	4	4	4	4	PF3D7_1001000	PF3D7_1001000			1001000.1 1001000 Plasmodium exported protein (hyp12), unknown function Plasmodium exported protein (hyp12), unknown function Pf3D7_10_v3:63152-64032(+) 231
617	0.789848	5.92156	5.13171	8.212	9.80306	0	323.31	205	44	40	44	40	PF3D7_1035900	PF3D7_1035900			1035900.1 1035900 probable protein, unknown function probable protein, unknown function Pf3D7_10_v3:1423983-1425683(+) 566
616	0.776527	6.02413	5.2476	8.24499	9.88845	0	323.31	160	54	51	53	50	PF3D7_1035700	PF3D7_1035700			1035700.1 1035700 duffy binding-like merozoite surface protein duffy binding-like merozoite surface protein Pf3D7_10_v3:1413200-1415293(+) 697
615	0.764772	-6.44563	-7.2104	4.22021	5.52124	0.0035842	3.141	1	0	1	0	1	PF3D7_1311400	PF3D7_1311400			1311400.1 1311400 AP-1 complex subunit mu-1 AP-1 complex subunit mu-1 Pf3D7_13_v3:487511-488824(+) 437
614	0.744066	0.998518	0.254452	6.73736	8.05956	0	22.603	14	6	4	6	4	PF3D7_1205700	PF3D7_1205700			1205700.1 1205700 targeted glyoxalase II targeted glyoxalase II Pf3D7_12_v3:253155-254123(+) 322
613	0.742672	1.50662	0.763946	6.89054	8.16929	0	27.665	17	7	5	7	5	PF3D7_1036000	PF3D7_1036000			1036000.1 1036000 merozoite surface protein merozoite surface protein Pf3D7_10_v3:1427127-1428344(+) 405
612	0.734419	3.81929	3.08487	7.58807	8.76416	0	90.728	45	17	15	16	14	PF3D7_0802200	PF3D7_0802200			0802200.1 0802200 1-cys peroxiredoxin 1-cys peroxiredoxin Pf3D7_08_v3:165416-166078(+) 220
611	0.733309	-2.87527	-3.60858	5.57298	6.57298	0	38.317	6	3	3	3	3	PF3D7_0109000	PF3D7_0109000			0109000.1 0109000 photosensitized INA-labeled protein PHIL1, putative photosensitized INA-labeled protein PHIL1, putative Pf3D7_01_v3:363318-363992(+) 224
610	0.724228	6.57905	5.85482	8.42048	9.74269	0	222.01	156	36	31	36	31	PF3D7_0404900	PF3D7_0404900			0404900.1 0404900 6-cysteine protein 6-cysteine protein Pf3D7_04_v3:267244-268380(-) 378
609	0.715233	3.03927	2.32404	7.35637	9.04657	0	149.22	71	26	23	26	23	PF3D7_0207400	PF3D7_0207400			0207400.1 0207400 serine repeat antigen 7 serine repeat antigen 7 Pf3D7_02_v3:294273-297616(-) 946
608	0.714397	1.0363	0.321903	6.75354	8.20071	0	72.301	22	11	11	11	11	PF3D7_0424100	PF3D7_0424100			0424100.1 0424100 reticulocyte binding protein homologue 5 reticulocyte binding protein homologue 5 Pf3D7_04_v3:1082363-1084150(-) 526
607	0.712295	3.23501	2.52272	7.41579	8.71681	0	63.929	51	15	15	1	1	PF3D7_0501100	PF3D7_0501100			0501100.1 0501100 heat shock protein 40, type II heat shock protein 40, type II Pf3D7_05_v3:58037-59726(-) 402
606	0.707121	-2.31052	-3.01764	5.74725	6.74725	0	4.7268	4	1	3	1	3	PF3D7_0720800	PF3D7_0720800			0720800.1 0720800 Ham1-like protein, putative Ham1-like protein, putative Pf3D7_07_v3:899751-901137(+) 198
605	0.702658	4.66322	3.96056	7.84728	8.84728	0	69.618	60	13	12	13	12	PF3D7_0925900	PF3D7_0925900			0925900.1 0925900 conserved Plasmodium protein, unknown function conserved Plasmodium protein, unknown function Pf3D7_09_v3:1040713-1041516(+) 217
604	0.700584	5.66986	4.96928	8.15066	9.9215	0	323.31	182	56	50	56	50	PF3D7_0500800	PF3D7_0500800			0500800.1 0500800 mature parasite-infected erythrocyte surface antigen mature parasite-infected erythrocyte surface antigen Pf3D7_05_v3:43327-47761(-) 1434
603	0.698805	0.86289	0.164085	6.7039	8.18101	0	21.966	19	8	8	8	8	PF3D7_0629300	PF3D7_0629300			0629300.1 0629300 phospholipase, putative phospholipase, putative Pf3D7_06_v3:1205190-1207781(+) 863
602	0.692856	-1.15361	-1.84647	6.09785	7.44028	0	10.284	4	3	3	3	3	PF3D7_1252700	PF3D7_1252700			1252700.1 1252700 Plasmodium exported protein (PHISTb), unknown function Plasmodium exported protein (PHISTb), unknown function Pf3D7_12_v3:2154618-2156124(+) 450
601	0.686947	0.0764732	-0.610474	6.46913	8.15933	0	41.509	34	19	14	19	14	PF3D7_0323400	PF3D7_0323400			0323400.1 0323400 Rh5 interacting protein Rh5 interacting protein Pf3D7_03_v3:980706-983966(-) 1086
600	0.68162	3.45874	2.77712	7.48816	9.42266	0	323.31	177	64	57	64	57	PF3D7_0102500	PF3D7_0102500			0102500.1 0102500 erythrocyte binding antigen-181 erythrocyte binding antigen-181 Pf3D7_01_v3:110750-115799(-) 1567
599	0.675156	2.28966	1.6145	7.13729	8.43832	0	27.419	17	7	8	7	8	PF3D7_1205600	PF3D7_1205600			1205600.1 1205600 conserved Plasmodium protein, unknown function conserved Plasmodium protein, unknown function Pf3D7_12_v3:249336-251399(-) 333
598	0.668682	3.01804	2.34936	7.35763	8.93741	0	107.12	51	16	18	16	18	PF3D7_1001600	PF3D7_1001600			1001600.1 1001600 alpha/beta hydrolase, putative alpha/beta hydrolase, putative Pf3D7_10_v3:86538-89009(-) 763
597	0.663235	-5.18611	-5.84935	4.88884	6.46863	0	8.517	6	3	5	3	5	PF3D7_0506900	PF3D7_0506900			0506900.1 0506900 rhomboid protease ROM4 rhomboid protease ROM4 Pf3D7_05_v3:288776-291055(-) 759
596	0.661661	3.40466	2.743	7.47518	8.25334	0	21.175	16	7	5	7	5	PF3D7_1001200	PF3D7_1001200			1001200.1 1001200 acyl-CoA binding protein, isoform 2, ACBP2 acyl-CoA binding protein, isoform 2, ACBP2 Pf3D7_10_v3:70547-70819(-) 90
595	0.656478	-4.49842	-5.15489	5.09698	7.02641	0	13.444	7	5	5	5	5	PF3D7_1021100	PF3D7_1021100			1021100.1 1021100 conserved Plasmodium protein, unknown function conserved Plasmodium protein, unknown function Pf3D7_10_v3:851000-856285(-) 1761
594	0.654865	5.84688	5.19202	8.21149	10.1146	0	323.31	386	107	106	107	106	PF3D7_0731500	PF3D7_0731500			0731500.1 0731500 erythrocyte binding antigen-175 erythrocyte binding antigen-175 Pf3D7_07_v3:1358055-1362929(+) 1502
593	0.644157	3.69084	3.04668	7.56424	8.67818	0	29.809	33	13	13	13	13	PF3D7_1226600	PF3D7_1226600			1226600.1 1226600 proliferating cell nuclear antigen 2 proliferating cell nuclear antigen 2 Pf3D7_12_v3:1077868-1078776(-) 264
592	0.643356	6.16227	5.51891	8.30835	9.00732	0	86.686	134	12	12	4	3	PF3D7_1365900;PF3D7_1211800	PF3D7_1365900;PF3D7_1211800			1365900.1 1365900 ubiquitin-60S ribosomal protein L40 ubiquitin-60S ribosomal protein L40 Pf3D7_13_v3:2632534-2633260(-) 128;1211800.1 1211800 polyubiquitin polyubiquitin Pf3D7_12_v3:526109-527780(+) 381
591	0.63265	0.87649	0.243839	6.71896	7.9494	0	36.7	8	3	4	3	4	PF3D7_0907700	PF3D7_0907700			0907700.1 0907700 subunit of proteaseome activator complex, putative subunit of proteaseome activator complex, putative Pf3D7_09_v3:364069-364908(-) 279
590	0.632389	-3.45534	-4.08773	5.41499	7.55171	0	9.6357	6	3	3	3	3	PF3D7_0201900	PF3D7_0201900			0201900.1 0201900 erythrocyte membrane protein 3 erythrocyte membrane protein 3 Pf3D7_02_v3:91318-98838(-) 2441
589	0.628689	1.70582	1.07713	6.96928	8.04844	0	46.259	20	6	5	6	5	PF3D7_0702500	PF3D7_0702500			0702500.1 0702500 Plasmodium exported protein, unknown function Plasmodium exported protein, unknown function Pf3D7_07_v3:104957-105989(-) 253
588	0.623972	3.97896	3.35499	7.65435	9.32646	0	155.78	84	32	32	32	32	PF3D7_1116000	PF3D7_1116000			1116000.1 1116000 rhoptry neck protein 4 rhoptry neck protein 4 Pf3D7_11_v3:602983-606918(-) 1201
587	0.61986	8.70361	8.08375	9.0773	10.7675	0	323.31	674	103	97	102	96	PF3D7_0207600	PF3D7_0207600			0207600.1 0207600 serine repeat antigen 5 serine repeat antigen 5 Pf3D7_02_v3:303593-307027(-) 997
586	0.617853	1.2601	0.642244	6.83693	8.72341	0	114.17	59	31	27	31	27	PF3D7_1464600	PF3D7_1464600			1464600.1 1464600 serine/threonine protein phosphatase UIS2, putative serine/threonine protein phosphatase UIS2, putative Pf3D7_14_v3:2619679-2624187(+) 1442
585	0.614069	1.13738	0.523312	6.80062	7.91456	0	29.92	13	7	4	7	4	PF3D7_0212600	PF3D7_0212600			0212600.1 0212600 secreted protein with altered thrombospondin repeat domain secreted protein with altered thrombospondin repeat domain Pf3D7_02_v3:522931-523999(+) 250
584	0.608872	3.24154	2.63267	7.4349	8.75712	0	41.185	34	14	15	14	15	PF3D7_1108600	PF3D7_1108600			1108600.1 1108600 endoplasmic reticulum-resident calcium binding protein endoplasmic reticulum-resident calcium binding protein Pf3D7_11_v3:369675-370706(-) 343
583	0.605789	-3.88552	-4.49131	5.28997	7.41707	0	64.667	48	20	24	20	24	PF3D7_0812100	PF3D7_0812100			0812100.1 0812100 conserved Plasmodium protein, unknown function conserved Plasmodium protein, unknown function Pf3D7_08_v3:604923-612878(+) 2651
582	0.602015	3.619	3.01699	7.54969	8.24866	0	34.959	28	3	3	3	3	PF3D7_1353200	PF3D7_1353200			1353200.1 1353200 membrane associated histidine-rich protein membrane associated histidine-rich protein Pf3D7_13_v3:2130531-2131065(+) 137
581	0.574919	-0.335901	-0.91082	6.36374	7.14189	0	8.1698	5	4	3	4	3	PF3D7_1219900	PF3D7_1219900			1219900.1 1219900 ribulose-phosphate 3-epimerase, putative ribulose-phosphate 3-epimerase, putative Pf3D7_12_v3:796500-797183(+) 227
580	0.573226	-6.43762	-7.01085	4.52723	6.14	0.0034722	2.8808	2	1	2	1	2	PF3D7_0309300	PF3D7_0309300			0309300.1 0309300 N2227-like protein, putative N2227-like protein, putative Pf3D7_03_v3:397649-400516(+) 955
579	0.56032	-2.39757	-2.95789	5.74561	6.787	0.0036232	3.2882	3	2	2	2	2	PF3D7_0317600	PF3D7_0317600			0317600.1 0317600 40S ribosomal protein S11, putative 40S ribosomal protein S11, putative Pf3D7_03_v3:725015-726130(+) 161
578	0.55673	5.03326	4.47653	7.98313	9.18724	0	228.41	62	20	21	20	21	PF3D7_0936800	PF3D7_0936800			0936800.1 0936800 Plasmodium exported protein (PHISTc), unknown function Plasmodium exported protein (PHISTc), unknown function Pf3D7_09_v3:1458392-1459862(+) 383
577	0.548723	-0.51718	-1.0659	6.31366	7.59241	0	12.836	5	3	2	3	2	PF3D7_1202100.2;PF3D7_1202100	PF3D7_1202100.2;PF3D7_1202100			1202100.2 1202100 SRAP domain-containing protein, putative SRAP domain-containing protein, putative Pf3D7_12_v3:113787-115923(+) 400;1202100.1 1202100 SRAP domain-containing protein, putative SRAP domain-containing protein, putative Pf3D7_12_v3:11
576	0.547581	5.62333	5.07575	8.16233	9.65369	0	219.57	72	13	11	13	11	PF3D7_1035200	PF3D7_1035200			1035200.1 1035200 S-antigen S-antigen Pf3D7_10_v3:1394839-1396596(+) 585
575	0.547104	6.30323	5.75612	8.36708	10.0831	0	323.31	270	58	51	58	51	PF3D7_1035300	PF3D7_1035300			1035300.1 1035300 glutamate-rich protein glutamate-rich protein Pf3D7_10_v3:1399195-1402896(+) 1233
574	0.54403	-7.58452	-8.12855	4.18698	6.2204	0.009061	2.4045	1	1	1	1	1	PF3D7_1019000	PF3D7_1019000			1019000.1 1019000 eukaryotic translation initiation factor subunit eIF2A, putative eukaryotic translation initiation factor subunit eIF2A, putative Pf3D7_10_v3:757795-765158(+) 2405
573	0.536869	2.18899	1.65212	7.13033	8.69854	0	49.71	23	11	8	11	8	PF3D7_0722200	PF3D7_0722200			0722200.1 0722200 rhoptry-associated leucine zipper-like protein 1 rhoptry-associated leucine zipper-like protein 1 Pf3D7_07_v3:946363-948612(+) 749
572	0.53532	3.29105	2.75573	7.46235	9.5862	0	323.31	580	140	140	140	140	PF3D7_1252100	PF3D7_1252100			1252100.1 1252100 rhoptry neck protein 3 rhoptry neck protein 3 Pf3D7_12_v3:2114628-2122487(-) 2215
571	0.531422	5.65476	5.12334	8.17458	10.0496	0	323.31	1298	136	140	27	29	PF3D7_0302500	PF3D7_0302500			0302500.1 0302500 cytoadherence linked asexual protein 3.1 cytoadherence linked asexual protein 3.1 Pf3D7_03_v3:135418-140660(+) 1417
570	0.531073	0.594544	0.0634708	6.65136	7.69275	0	20.44	20	8	8	8	8	PF3D7_1356300	PF3D7_1356300			1356300.1 1356300 ubiquitin-conjugating enzyme, putative ubiquitin-conjugating enzyme, putative Pf3D7_13_v3:2231883-2233248(+) 202
569	0.530453	6.58844	6.05798	8.4558	10.109	0	323.31	195	62	64	61	63	PF3D7_1420700;Q8NF91-7;Q8NF91	PF3D7_1420700			1420700.1 1420700 surface protein P113 surface protein P113 Pf3D7_14_v3:860011-863080(+) 969
568	0.518503	-3.08636	-3.60486	5.54547	7.29365	0.0035587	3.124	4	1	1	1	1	PF3D7_0613300	PF3D7_0613300			0613300.1 0613300 rhoptry protein ROP14 rhoptry protein ROP14 Pf3D7_06_v3:540077-544798(-) 1422
567	0.497583	-5.51107	-6.00865	NaN	NaN	0	26.075	1	1	0	1	0	PF3D7_1036300	PF3D7_1036300			1036300.1 1036300 duffy binding-like merozoite surface protein 2 duffy binding-like merozoite surface protein 2 Pf3D7_10_v3:1432498-1434786(+) 762
566	0.493702	2.47961	1.98591	7.22531	9.05138	0	199.8	268	62	62	62	62	PF3D7_0935800	PF3D7_0935800			0935800.1 0935800 cytoadherence linked asexual protein 9 cytoadherence linked asexual protein 9 Pf3D7_09_v3:1413840-1419754(+) 1340
565	0.48718	-5.04186	-5.52904	4.96226	6.99968	0	22.064	14	9	11	9	11	PF3D7_1219100	PF3D7_1219100			1219100.1 1219100 clathrin heavy chain, putative clathrin heavy chain, putative Pf3D7_12_v3:757649-763642(+) 1997
564	0.482122	-1.02428	-1.5064	6.17254	7.42783	0	12.712	4	5	4	5	4	PF3D7_0501200	PF3D7_0501200			0501200.1 0501200 parasite-infected erythrocyte surface protein parasite-infected erythrocyte surface protein Pf3D7_05_v3:64065-65489(+) 408
563	0.480192	2.15089	1.6707	7.12872	8.54368	0	81.338	24	11	12	11	12	PF3D7_0827900	PF3D7_0827900			0827900.1 0827900 protein disulfide isomerase protein disulfide isomerase Pf3D7_08_v3:1206788-1208394(-) 483
562	0.471235	-1.9289	-2.40014	5.90215	6.98133	0	5.9097	4	2	2	2	2	PF3D7_1330000;PF3D7_1330000.2	PF3D7_1330000;PF3D7_1330000.2			1330000.1 1330000 thioredoxin, putative thioredoxin, putative Pf3D7_13_v3:1272213-1273859(+) 206;1330000.2 1330000 thioredoxin, putative thioredoxin, putative Pf3D7_13_v3:1272213-1273859(+) 195
561	0.459156	2.03574	1.57659	7.09774	8.39877	0	24.319	11	8	7	8	7	PF3D7_1110700	PF3D7_1110700			1110700.1 1110700 actin-like protein, putative actin-like protein, putative Pf3D7_11_v3:428362-430047(+) 378
560	0.456627	4.62746	4.17084	7.87838	9.36975	0	125.26	73	28	29	28	29	PF3D7_0828800	PF3D7_0828800			0828800.1 0828800 GPI-anchored micronemal antigen GPI-anchored micronemal antigen Pf3D7_08_v3:1237285-1239501(-) 738
559	0.452442	-1.30024	-1.75268	6.09472	7.88709	0	17.437	12	7	5	7	5	PF3D7_0207900	PF3D7_0207900			0207900.1 0207900 serine repeat antigen 2 serine repeat antigen 2 Pf3D7_02_v3:317596-321310(-) 1105
558	0.449169	0.556763	0.107593	6.65428	7.83038	0	32.264	18	12	10	12	10	PF3D7_0518300	PF3D7_0518300			0518300.1 0518300 proteasome subunit beta type-1, putative proteasome subunit beta type-1, putative Pf3D7_05_v3:759831-760998(-) 240
557	0.445116	-5.66013	-6.10525	4.39846	5.81343	0.0076014	2.6149	1	1	0	1	0	PF3D7_1334300	PF3D7_1334300			1334300.1 1334300 MSP7-like protein MSP7-like protein Pf3D7_13_v3:1400897-1402276(-) 459
556	0.437281	-1.07069	-1.50797	6.16649	7.37061	0	4.5911	2	2	2	2	2	PF3D7_1016800	PF3D7_1016800			1016800.1 1016800 Plasmodium exported protein (PHISTc), unknown function Plasmodium exported protein (PHISTc), unknown function Pf3D7_10_v3:675293-676417(-) 314
555	0.435814	0.394028	-0.0417862	6.60766	8.66836	0	131.98	102	43	41	43	41	PF3D7_0419400;PF3D7_0512400	PF3D7_0419400			0419400.1 0419400 conserved Plasmodium protein, unknown function conserved Plasmodium protein, unknown function Pf3D7_04_v3:857998-865957(+) 2472
554	0.431923	0.216961	-0.214962	6.55507	7.75918	0	21.614	22	7	7	6	6	PF3D7_0512600	PF3D7_0512600			0512600.1 0512600 ras-related protein Rab-1B ras-related protein Rab-1B Pf3D7_05_v3:544540-545993(+) 200
553	0.431179	-1.60386	-2.03504	6.00706	7.00706	0	5.1271	4	2	2	2	2	PF3D7_1441200	PF3D7_1441200			1441200.1 1441200 60S ribosomal protein L1, putative 60S ribosomal protein L1, putative Pf3D7_14_v3:1678662-1679486(+) 217
552	0.428721	0.625832	0.197111	6.6787	7.75789	0	6.3059	3	3	2	3	2	PF3D7_1026800	PF3D7_1026800			1026800.1 1026800 40S ribosomal protein S2 40S ribosomal protein S2 Pf3D7_10_v3:1122962-1124037(+) 263
551	0.428038	2.04129	1.61326	7.10493	8.3602	0	57.469	57	17	17	17	17	PF3D7_1135400	PF3D7_1135400			1135400.1 1135400 conserved Plasmodium protein, unknown function conserved Plasmodium protein, unknown function Pf3D7_11_v3:1384378-1385115(-) 245
550	0.424925	3.38635	2.96143	7.51038	8.87212	0	89.039	49	22	23	22	23	PF3D7_0501500	PF3D7_0501500			0501500.1 0501500 rhoptry-associated protein 3 rhoptry-associated protein 3 Pf3D7_05_v3:81134-82336(-) 400
549	0.422186	5.32923	4.90705	8.09573	9.20968	0	107.4	107	18	18	18	18	PF3D7_1471100	PF3D7_1471100			1471100.1 1471100 exported protein 2 exported protein 2 Pf3D7_14_v3:2905163-2906565(-) 287
548	0.421188	-2.66186	-3.08305	5.69035	7.45378	0.0035651	3.1318	3	1	2	1	2	PF3D7_0918900	PF3D7_0918900			0918900.1 0918900 gamma-glutamylcysteine synthetase gamma-glutamylcysteine synthetase Pf3D7_09_v3:777558-780749(+) 1063
547	0.419756	2.7235	2.30374	7.31175	9.64822	0	323.31	252	98	98	98	98	PF3D7_1149000	PF3D7_1149000			1149000.1 1149000 antigen 332, DBL-like protein antigen 332, DBL-like protein Pf3D7_11_v3:1950210-1968726(+) 6093
546	0.409739	6.47282	6.06308	8.44221	10.1904	0	323.31	229	70	68	59	57	PF3D7_0207700	PF3D7_0207700			0207700.1 0207700 serine repeat antigen 4 serine repeat antigen 4 Pf3D7_02_v3:308847-312155(-) 962
545	0.408291	4.08162	3.67333	7.72265	9.4935	0	323.31	124	34	32	34	32	PF3D7_0220000	PF3D7_0220000			0220000.1 0220000 liver stage antigen 3 liver stage antigen 3 Pf3D7_02_v3:796752-801586(+) 1558
544	0.407062	2.77381	2.36675	7.32919	8.44312	0	31.957	21	10	7	10	7	PF3D7_1027300	PF3D7_1027300			1027300.1 1027300 peroxiredoxin peroxiredoxin Pf3D7_10_v3:1140589-1142602(-) 393
543	0.40674	7.19114	6.78439	8.65899	10.2501	0	323.31	238	54	57	54	57	PF3D7_1149200;PF3D7_1149500	PF3D7_1149200			1149200.1 1149200 ring-infected erythrocyte surface antigen ring-infected erythrocyte surface antigen Pf3D7_11_v3:1976407-1979804(+) 1090
542	0.406242	2.61774	2.2115	7.28235	8.42847	0	30.686	31	10	8	10	8	PF3D7_0803800	PF3D7_0803800			0803800.1 0803800 proteasome subunit beta type-4 proteasome subunit beta type-4 Pf3D7_08_v3:233467-234426(-) 265
541	0.399668	4.09902	3.69936	7.72943	8.90552	0	41.41	38	14	14	14	14	PF3D7_0731300	PF3D7_0731300			0731300.1 0731300 Plasmodium exported protein (PHISTb), unknown function Plasmodium exported protein (PHISTb), unknown function Pf3D7_07_v3:1350032-1351149(+) 317
540	0.393318	0.491131	0.0978127	6.64449	7.79062	0	16.056	16	6	6	6	6	PF3D7_1463500	PF3D7_1463500			1463500.1 1463500 fam-a protein fam-a protein Pf3D7_14_v3:2577974-2579379(+) 258
539	0.379597	5.99549	5.61589	8.30393	9.70187	0	238.55	108	38	35	38	35	PF3D7_1201000	PF3D7_1201000			1201000.1 1201000 Plasmodium exported protein (PHISTb), unknown function Plasmodium exported protein (PHISTb), unknown function Pf3D7_12_v3:76846-79067(-) 653
538	0.370831	-0.819689	-1.19052	6.25394	8.49947	0	41.449	25	10	13	10	13	PF3D7_1335300	PF3D7_1335300			1335300.1 1335300 reticulocyte binding protein 2 homologue b reticulocyte binding protein 2 homologue b Pf3D7_13_v3:1428874-1438852(-) 3254
537	0.369999	0.495827	0.125828	6.6501	7.6915	0	32.164	20	8	7	8	7	PF3D7_1419300	PF3D7_1419300			1419300.1 1419300 glutathione S-transferase glutathione S-transferase Pf3D7_14_v3:802717-803481(+) 211
536	0.366665	2.95192	2.58526	7.39005	8.78799	0	148.99	46	11	12	11	12	PF3D7_0501400	PF3D7_0501400			0501400.1 0501400 interspersed repeat antigen interspersed repeat antigen Pf3D7_05_v3:74509-79842(+) 1720
535	0.365492	-1.52407	-1.88956	6.04285	7.54802	0	8.4785	6	3	3	3	3	PF3D7_1016400	PF3D7_1016400			1016400.1 1016400 serine/threonine protein kinase, FIKK family serine/threonine protein kinase, FIKK family Pf3D7_10_v3:656709-659027(-) 609
534	0.364595	3.29964	2.93505	7.49511	8.95751	0	88.331	50	19	17	19	17	PF3D7_0401800	PF3D7_0401800			0401800.1 0401800 Plasmodium exported protein (PHISTb), unknown function Plasmodium exported protein (PHISTb), unknown function Pf3D7_04_v3:103742-105603(-) 560
533	0.358105	7.43512	7.07701	8.74119	9.99646	0	276.99	181	37	37	37	37	PF3D7_1129100	PF3D7_1129100			1129100.1 1129100 parasitophorous vacuolar protein 1 parasitophorous vacuolar protein 1 Pf3D7_11_v3:1125952-1127310(+) 452
532	0.346472	-1.32062	-1.66709	6.10758	7.2537	0	10.042	8	3	2	3	2	PF3D7_0202200	PF3D7_0202200			0202200.1 0202200 EMP1-trafficking protein EMP1-trafficking protein Pf3D7_02_v3:112547-113682(-) 290
531	0.344536	6.65837	6.31384	8.50983	10.4129	0	323.31	1171	158	153	158	153	PF3D7_0929400	PF3D7_0929400			0929400.1 0929400 high molecular weight rhoptry protein 2 high molecular weight rhoptry protein 2 Pf3D7_09_v3:1175203-1180762(+) 1378
530	0.34355	4.96706	4.62351	8.00087	9.71688	0	323.31	216	71	77	71	77	PF3D7_1116800	PF3D7_1116800			1116800.1 1116800 heat shock protein 101 heat shock protein 101 Pf3D7_11_v3:636094-639511(-) 906
529	0.34207	1.55288	1.21081	6.97338	8.11952	0	11.106	21	3	3	3	3	PF3D7_0501000	PF3D7_0501000			0501000.1 0501000 Plasmodium exported protein, unknown function Plasmodium exported protein, unknown function Pf3D7_05_v3:55841-56872(+) 260
528	0.33218	0.814712	0.482532	6.75297	7.65606	0	13.071	15	4	5	4	5	PF3D7_1412300	PF3D7_1412300			1412300.1 1412300 nuclear transport factor 2, putative nuclear transport factor 2, putative Pf3D7_14_v3:491494-492221(-) 125
527	0.327698	0.117292	-0.210405	6.54383	7.38894	0	11.224	13	4	4	4	4	PF3D7_1345100	PF3D7_1345100			1345100.1 1345100 thioredoxin 2 thioredoxin 2 Pf3D7_13_v3:1809736-1810521(-) 157
526	0.325169	4.66968	4.34451	7.91471	9.53797	0	254.78	275	55	55	55	55	PF3D7_1105600	PF3D7_1105600			1105600.1 1105600 translocon component PTEX88 translocon component PTEX88 Pf3D7_11_v3:241184-243517(-) 777
525	0.319237	1.92424	1.60501	7.08934	8.41155	0	24.56	15	8	9	7	8	PF3D7_1408000	PF3D7_1408000			1408000.1 1408000 plasmepsin II plasmepsin II Pf3D7_14_v3:293471-294832(+) 453
524	0.314733	7.73704	7.42231	8.84	10.6182	0	323.31	226	34	35	34	35	PF3D7_1016300;PF3D7_0937000	PF3D7_1016300			1016300.1 1016300 glycophorin binding protein glycophorin binding protein Pf3D7_10_v3:650898-653567(-) 824
523	0.312788	5.55166	5.23887	8.18247	9.93067	0	323.31	188	47	45	47	45	PF3D7_0207500	PF3D7_0207500			0207500.1 0207500 serine repeat antigen 6 serine repeat antigen 6 Pf3D7_02_v3:298897-302564(-) 1031
522	0.301769	4.39553	4.09376	7.83648	9.01258	0	56.481	38	15	17	15	17	PF3D7_1347500	PF3D7_1347500			1347500.1 1347500 DNA/RNA-binding protein Alba 4 DNA/RNA-binding protein Alba 4 Pf3D7_13_v3:1897983-1899362(-) 372
521	0.29854	3.7049	3.40636	7.62918	9.16065	0	157.75	38	15	15	15	15	PF3D7_0935900	PF3D7_0935900			0935900.1 0935900 ring-exported protein 1 ring-exported protein 1 Pf3D7_09_v3:1420483-1422807(-) 713
520	0.293163	4.45282	4.15965	7.85532	9.71265	0	323.31	300	69	74	69	74	PF3D7_1014100	PF3D7_1014100			1014100.1 1014100 conserved Plasmodium protein, unknown function conserved Plasmodium protein, unknown function Pf3D7_10_v3:555160-559527(+) 1455
519	0.293137	-3.52554	-3.81868	5.45361	7.03338	0	8.0489	6	4	2	4	2	PF3D7_0215000	PF3D7_0215000			0215000.1 0215000 acyl-CoA synthetase acyl-CoA synthetase Pf3D7_02_v3:616772-619429(-) 885
518	0.287067	-1.40999	-1.69706	6.09156	6.86971	0	4.1488	4	2	2	2	2	PF3D7_0505800	PF3D7_0505800			0505800.1 0505800 small ubiquitin-related modifier small ubiquitin-related modifier Pf3D7_05_v3:252047-252606(-) 100
517	0.283934	5.79617	5.51224	8.26141	9.56244	0	192.41	119	31	27	31	27	PF3D7_0501600	PF3D7_0501600			0501600.1 0501600 rhoptry-associated protein 2 rhoptry-associated protein 2 Pf3D7_05_v3:84041-85237(-) 398
516	0.282366	3.40659	3.12423	7.54235	8.92257	0	209.19	33	8	8	8	8	PF3D7_1028700	PF3D7_1028700			1028700.1 1028700 merozoite TRAP-like protein merozoite TRAP-like protein Pf3D7_10_v3:1181005-1182501(+) 498
515	0.274963	4.67094	4.39597	7.92434	9.07048	0	103.83	91	20	18	20	18	PF3D7_1115600	PF3D7_1115600			1115600.1 1115600 peptidyl-prolyl cis-trans isomerase peptidyl-prolyl cis-trans isomerase Pf3D7_11_v3:589707-590629(-) 195
514	0.27302	-2.4424	-2.71542	5.78338	7.38545	0.00093809	3.7805	4	2	3	2	3	PF3D7_1039000;PF3D7_0902400;REV__Q8TEQ6	PF3D7_1039000			1039000.1 1039000 serine/threonine protein kinase, FIKK family serine/threonine protein kinase, FIKK family Pf3D7_10_v3:1568709-1571815(+) 913
513	0.263277	-0.827152	-1.09043	6.27142	7.97039	0	5.8558	4	1	2	1	2	PF3D7_1120000	PF3D7_1120000			1120000.1 1120000 conserved Plasmodium protein, unknown function conserved Plasmodium protein, unknown function Pf3D7_11_v3:756192-760435(+) 1070
512	0.261923	1.85138	1.58945	7.07799	8.43973	0	63.185	39	15	13	15	13	PF3D7_0532400	PF3D7_0532400			0532400.1 0532400 lysine-rich membrane-associated PHISTb protein lysine-rich membrane-associated PHISTb protein Pf3D7_05_v3:1312471-1314154(+) 528
511	0.260643	1.80571	1.54507	7.0645	8.36551	0	119.82	31	17	14	17	14	PF3D7_0402100	PF3D7_0402100			0402100.1 0402100 Plasmodium exported protein (PHISTb), unknown function Plasmodium exported protein (PHISTb), unknown function Pf3D7_04_v3:123588-125464(-) 575
510	0.259142	0.483978	0.224836	6.66688	8.22318	0	19.617	14	8	9	8	9	PF3D7_1135100	PF3D7_1135100			1135100.1 1135100 protein phosphatase PPM8, putative protein phosphatase PPM8, putative Pf3D7_11_v3:1374592-1376661(-) 689
509	0.257032	3.14253	2.88549	7.46758	8.72286	0	49.377	44	11	10	11	10	PF3D7_0202100	PF3D7_0202100			0202100.1 0202100 liver stage associated protein 2 liver stage associated protein 2 Pf3D7_02_v3:109564-110580(-) 302
508	0.256424	4.99817	4.74174	8.02629	8.87139	0	129.16	71	7	7	7	7	PF3D7_0503400	PF3D7_0503400			0503400.1 0503400 actin-depolymerizing factor 1 actin-depolymerizing factor 1 Pf3D7_05_v3:140710-141471(+) 122
507	0.252674	-8.19669	-8.44937	4.05496	5.93001	0.0034752	2.8893	1	1	1	1	1	PF3D7_0606700	PF3D7_0606700			0606700.1 0606700 coatomer alpha subunit, putative coatomer alpha subunit, putative Pf3D7_06_v3:282049-287017(+) 1512
506	0.250778	-1.05514	-1.30591	6.20512	7.20512	0	18.619	10	5	6	5	6	PF3D7_0606900	PF3D7_0606900			0606900.1 0606900 glutaredoxin-like protein glutaredoxin-like protein Pf3D7_06_v3:290426-291085(-) 219
505	0.246874	-4.05351	-4.30038	5.30326	6.38243	0.0036166	3.2744	2	1	1	1	1	PF3D7_1103700	PF3D7_1103700			1103700.1 1103700 casein kinase II beta chain casein kinase II beta chain Pf3D7_11_v3:160115-160852(+) 245
504	0.246746	5.54242	5.29567	8.19193	9.30589	0	151.28	52	17	18	17	18	PF3D7_0419600;PF3D7_1023900	PF3D7_0419600			0419600.1 0419600 ran-specific GTPase-activating protein 1, putative ran-specific GTPase-activating protein 1, putative Pf3D7_04_v3:870737-871873(+) 280
503	0.245779	-0.968365	-1.21414	6.23218	7.27358	0	12.17	9	4	5	4	5	PF3D7_0113900	PF3D7_0113900			0113900.1 0113900 Plasmodium exported protein (hyp8), unknown function Plasmodium exported protein (hyp8), unknown function Pf3D7_01_v3:537109-538025(-) 243
502	0.244587	3.42994	3.18536	7.55642	9.28881	0	134	67	27	30	27	30	PF3D7_0202400	PF3D7_0202400			0202400.1 0202400 gamete antigen 27/25, putative gamete antigen 27/25, putative Pf3D7_02_v3:120524-124102(+) 1192
501	0.243172	6.93395	6.69078	8.6115	10.143	0	290.89	308	51	52	51	52	PF3D7_1228600	PF3D7_1228600			1228600.1 1228600 merozoite surface protein 9 merozoite surface protein 9 Pf3D7_12_v3:1160729-1162960(-) 743
500	0.240444	8.44806	8.20762	9.06781	10.2139	0	323.31	330	38	37	38	37	PF3D7_1343000	PF3D7_1343000			1343000.1 1343000 phosphoethanolamine N-methyltransferase phosphoethanolamine N-methyltransferase Pf3D7_13_v3:1696894-1698113(+) 266
499	0.240231	4.15044	3.91021	7.77413	9.50653	0	202.46	155	50	52	49	51	PF3D7_0207800	PF3D7_0207800			0207800.1 0207800 serine repeat antigen 3 serine repeat antigen 3 Pf3D7_02_v3:313449-316741(-) 930
498	0.238237	4.35132	4.11308	7.83497	10.0603	0	323.31	622	174	183	17	15	PF3D7_1335400	PF3D7_1335400			1335400.1 1335400 reticulocyte binding protein 2 homologue a reticulocyte binding protein 2 homologue a Pf3D7_13_v3:1440779-1450385(+) 3130
497	0.235777	-1.03288	-1.26866	6.21463	7.05971	0	4.1014	2	2	2	2	2	PF3D7_0308500	PF3D7_0308500			0308500.1 0308500 activator of Hsp90 ATPase, putative activator of Hsp90 ATPase, putative Pf3D7_03_v3:369925-370789(+) 140
496	0.233866	3.66654	3.43268	7.62965	9.34567	0	168.36	71	27	27	27	27	PF3D7_0902800	PF3D7_0902800			0902800.1 0902800 serine repeat antigen 9 serine repeat antigen 9 Pf3D7_09_v3:121621-125006(-) 932
495	0.233459	-0.725931	-0.959391	6.30747	7.48357	0	17.494	19	8	9	8	9	PF3D7_1251300	PF3D7_1251300			1251300.1 1251300 thymidylate kinase thymidylate kinase Pf3D7_12_v3:2095062-2096508(-) 210
494	0.233145	-0.423473	-0.656618	6.39856	8.26781	0	53.081	35	19	16	19	16	PF3D7_0831600	PF3D7_0831600			0831600.1 0831600 cytoadherence linked asexual protein 8 cytoadherence linked asexual protein 8 Pf3D7_08_v3:1358314-1363618(+) 1394
493	0.229572	-1.85298	-2.08256	5.96892	7.0103	0	4.6912	5	2	2	2	2	PF3D7_1301700	PF3D7_1301700			1301700.1 1301700 Plasmodium exported protein (hyp8), unknown function Plasmodium exported protein (hyp8), unknown function Pf3D7_13_v3:99548-100521(+) 245
492	0.228981	-2.47378	-2.70276	5.78215	7.28731	0	5.0245	3	3	3	3	3	PF3D7_1232100	PF3D7_1232100			1232100.1 1232100 60 kDa chaperonin 60 kDa chaperonin Pf3D7_12_v3:1328311-1331371(-) 718
491	0.220385	-3.84508	-4.06546	5.37096	7.48823	0.0036597	3.3894	3	1	1	1	1	PF3D7_1107300	PF3D7_1107300			1107300.1 1107300 polyadenylate-binding protein-interacting protein 1, putative polyadenylate-binding protein-interacting protein 1, putative Pf3D7_11_v3:301283-311287(-) 3334
490	0.216757	6.99849	6.78173	8.63589	10.2041	0	323.31	293	57	59	54	56	PF3D7_0831700	PF3D7_0831700			0831700.1 0831700 heat shock protein 70 heat shock protein 70 Pf3D7_08_v3:1365467-1367506(-) 679
489	0.216105	2.00043	1.78432	7.13146	8.13146	0	29.828	35	11	10	11	10	PF3D7_0721400	PF3D7_0721400			0721400.1 0721400 conserved Plasmodium protein, unknown function conserved Plasmodium protein, unknown function Pf3D7_07_v3:926692-928028(+) 214
488	0.207293	-2.29684	-2.50414	5.8395	7.11826	0	4.5522	2	1	2	1	2	PF3D7_0516400	PF3D7_0516400			0516400.1 0516400 phosducin-like protein, putative phosducin-like protein, putative Pf3D7_05_v3:681430-682437(-) 335
487	0.204866	0.308807	0.103941	6.62433	8.28708	0	100.27	34	18	11	18	11	PF3D7_0910100	PF3D7_0910100			0910100.1 0910100 exportin-7, putative exportin-7, putative Pf3D7_09_v3:456959-461318(-) 1198
486	0.204718	-4.30586	-4.51057	5.2352	6.68237	0.0036004	3.2294	1	1	2	1	2	PF3D7_1306600	PF3D7_1306600			1306600.1 1306600 V-type proton ATPase subunit H, putative V-type proton ATPase subunit H, putative Pf3D7_13_v3:315042-316784(-) 455
485	0.201368	2.19313	1.99176	7.19223	8.30617	0	94.248	12	4	4	4	4	PF3D7_1302000	PF3D7_1302000			1302000.1 1302000 EMP1-trafficking protein EMP1-trafficking protein Pf3D7_13_v3:112792-113815(-) 312
484	0.199526	8.6034	8.40387	9.12225	10.2015	0	188.45	258	29	29	29	29	PF3D7_1324900	PF3D7_1324900			1324900.1 1324900 L-lactate dehydrogenase L-lactate dehydrogenase Pf3D7_13_v3:1041157-1042107(+) 316
483	0.199018	2.10717	1.90815	7.16681	8.82956	0	121.17	41	16	16	16	16	PF3D7_0830500	PF3D7_0830500			0830500.1 0830500 sporozoite and liver stage tryptophan-rich protein, putative sporozoite and liver stage tryptophan-rich protein, putative Pf3D7_08_v3:1296134-1298328(-) 675
482	0.197872	0.867521	0.669649	6.79384	8.11608	0	28.038	11	8	8	8	8	PF3D7_0413600	PF3D7_0413600			0413600.1 0413600 26S protease regulatory subunit 6B, putative 26S protease regulatory subunit 6B, putative Pf3D7_04_v3:616914-618350(-) 392
481	0.197247	4.53304	4.33579	7.8974	9.40255	0	259.88	117	33	33	33	33	PF3D7_1116700	PF3D7_1116700			1116700.1 1116700 dipeptidyl aminopeptidase 1 dipeptidyl aminopeptidase 1 Pf3D7_11_v3:630779-632881(-) 700
480	0.197222	-5.91968	-6.1169	NaN	NaN	0	4.4119	1	0	1	0	1	PF3D7_1111500	PF3D7_1111500			1111500.1 1111500 acylphosphatase, putative acylphosphatase, putative Pf3D7_11_v3:446020-446559(-) 129
479	0.19648	0.38043	0.18395	6.64748	7.94851	0	9.4666	7	3	4	3	4	PF3D7_1129200	PF3D7_1129200			1129200.1 1129200 26S proteasome regulatory subunit RPN7, putative 26S proteasome regulatory subunit RPN7, putative Pf3D7_11_v3:1128774-1130813(+) 393
478	0.192036	2.18969	1.99765	7.19296	8.99914	0	126.63	58	27	28	27	28	PF3D7_1301600	PF3D7_1301600			1301600.1 1301600 erythrocyte binding antigen-140 erythrocyte binding antigen-140 Pf3D7_13_v3:89319-93352(-) 1210
477	0.191946	8.20217	8.01022	9.0029	10.5344	0	323.31	407	73	78	63	68	PF3D7_0102200	PF3D7_0102200			0102200.1 0102200 ring-infected erythrocyte surface antigen ring-infected erythrocyte surface antigen Pf3D7_01_v3:98819-102282(+) 1085
476	0.190962	0.997662	0.8067	6.83433	8.13536	0	19.814	16	10	10	10	10	PF3D7_1401800	PF3D7_1401800			1401800.1 1401800 choline kinase choline kinase Pf3D7_14_v3:71368-72690(+) 440
475	0.190803	-5.50627	-5.69707	4.87648	5.91787	0.0035242	2.9985	2	1	1	1	1	PF3D7_0411100	PF3D7_0411100			0411100.1 0411100 conserved Plasmodium protein, unknown function conserved Plasmodium protein, unknown function Pf3D7_04_v3:504478-505095(-) 205
474	0.184587	-4.10577	-4.29036	5.29927	6.84333	0	8.9828	6	4	4	4	4	PF3D7_0517700	PF3D7_0517700			0517700.1 0517700 eukaryotic translation initiation factor 3 subunit B, putative eukaryotic translation initiation factor 3 subunit B, putative Pf3D7_05_v3:743179-745329(+) 716
473	0.182354	3.67344	3.49108	7.64144	8.81754	0	43.575	34	15	14	15	14	PF3D7_0417500	PF3D7_0417500			0417500.1 0417500 memo-like protein memo-like protein Pf3D7_04_v3:777200-779424(-) 296
472	0.179779	4.69071	4.51093	7.94817	8.79327	0	125.07	27	5	6	5	6	PF3D7_0501300	PF3D7_0501300			0501300.1 0501300 skeleton-binding protein 1 skeleton-binding protein 1 Pf3D7_05_v3:68930-70113(+) 337
471	0.168814	-2.8598	-3.02861	5.67733	6.71873	0.0027701	3.5788	3	1	2	1	2	PF3D7_0307100	PF3D7_0307100			0307100.1 0307100 40S ribosomal protein S12, putative 40S ribosomal protein S12, putative Pf3D7_03_v3:312693-313342(-) 141
470	0.167351	5.22133	5.05398	8.11029	9.38902	0	144.93	72	23	23	23	23	PF3D7_1401100	PF3D7_1401100			1401100.1 1401100 DnaJ protein, putative DnaJ protein, putative Pf3D7_14_v3:41289-43093(-) 492
469	0.165663	3.37925	3.21359	7.55607	8.9178	0	54.856	37	12	13	12	13	PF3D7_0808200	PF3D7_0808200			0808200.1 0808200 plasmepsin X plasmepsin X Pf3D7_08_v3:416344-418065(-) 573
468	0.162477	2.89492	2.73244	7.41088	9.24339	0	188.2	188	50	53	50	53	PF3D7_1332900	PF3D7_1332900			1332900.1 1332900 isoleucine--tRNA ligase, putative isoleucine--tRNA ligase, putative Pf3D7_13_v3:1350042-1353860(-) 1272
467	0.161136	-4.40534	-4.56647	5.21354	6.76984	0.0091135	2.4644	2	2	2	2	2	PF3D7_1102500	PF3D7_1102500			1102500.1 1102500 Plasmodium exported protein (PHISTb), unknown function Plasmodium exported protein (PHISTb), unknown function Pf3D7_11_v3:119412-121506(-) 624
466	0.160248	-1.04873	-1.20898	6.22414	8.00949	0	105.92	19	10	8	10	8	PF3D7_1315900	PF3D7_1315900			1315900.1 1315900 exportin-T, putative exportin-T, putative Pf3D7_13_v3:663741-667929(+) 1232
465	0.158209	1.1087	0.950493	6.87399	8.07809	0	38.23	16	7	7	7	7	PF3D7_1021600	PF3D7_1021600			1021600.1 1021600 deoxyribose-phosphate aldolase, putative deoxyribose-phosphate aldolase, putative Pf3D7_10_v3:871095-871886(+) 263
464	0.157332	-1.16142	-1.31875	6.19078	7.49181	0	9.379	7	3	3	3	3	PF3D7_1461400	PF3D7_1461400			1461400.1 1461400 conserved Plasmodium protein, unknown function conserved Plasmodium protein, unknown function Pf3D7_14_v3:2493400-2494762(-) 322
463	0.149115	-4.62973	-4.77885	5.14829	6.62542	0	4.8803	3	2	2	2	2	PF3D7_1312700	PF3D7_1312700			1312700.1 1312700 probable protein, unknown function probable protein, unknown function Pf3D7_13_v3:532270-533958(-) 562
462	0.146164	0.207218	0.0610542	6.60493	7.20699	0	25.736	12	3	4	3	4	PF3D7_0601900	PF3D7_0601900			0601900.1 0601900 conserved Plasmodium protein, unknown function conserved Plasmodium protein, unknown function Pf3D7_06_v3:78190-78784(+) 128
461	0.145302	5.1433	4.998	8.091	8.69307	0	63.416	48	9	10	9	10	PF3D7_1457200	PF3D7_1457200			1457200.1 1457200 thioredoxin 1 thioredoxin 1 Pf3D7_14_v3:2343640-2344218(-) 104
460	0.144758	0.590159	0.4454	6.72047	8.44475	0	51.209	30	13	13	13	13	PF3D7_0731100	PF3D7_0731100			0731100.1 0731100 EMP1-trafficking protein EMP1-trafficking protein Pf3D7_07_v3:1338959-1341790(+) 890
459	0.142502	5.13233	4.98982	8.08824	9.16741	0	135.95	158	25	26	25	26	PF3D7_0513300	PF3D7_0513300			0513300.1 0513300 purine nucleoside phosphorylase purine nucleoside phosphorylase Pf3D7_05_v3:569182-569919(-) 245
458	0.138096	1.90401	1.76591	7.11727	8.29336	0	16.852	11	6	7	6	7	PF3D7_1409300	PF3D7_1409300			1409300.1 1409300 DNA damage-inducible protein 1, putative DNA damage-inducible protein 1, putative Pf3D7_14_v3:363092-364240(+) 382
457	0.136404	3.79281	3.6564	7.68616	8.58926	0	35.712	22	7	7	7	7	PF3D7_0936300	PF3D7_0936300			0936300.1 0936300 ring-exported protein 3 ring-exported protein 3 Pf3D7_09_v3:1436687-1437981(-) 326
456	0.13475	5.87571	5.74095	8.31351	9.59227	0	114.59	110	34	34	34	34	PF3D7_0316300;PF3D7_0316300.2;D6RJB0;Q659C4-9;Q659C4-2;Q659C4	PF3D7_0316300;PF3D7_0316300.2			0316300.1 0316300 inorganic pyrophosphatase, putative inorganic pyrophosphatase, putative Pf3D7_03_v3:660020-661643(+) 380;0316300.2 0316300 inorganic pyrophosphatase, putative inorganic pyrophosphatase, putative Pf3D7_03_v3:658272-661643(+) 431
455	0.132444	1.60852	1.47607	7.02938	8.60918	0	58.309	28	14	16	14	16	PF3D7_0201700	PF3D7_0201700			0201700.1 0201700 DnaJ protein, putative DnaJ protein, putative Pf3D7_02_v3:81291-84165(-) 900
454	0.131193	3.13632	3.00512	7.48955	8.95195	0	91.092	55	20	21	20	21	PF3D7_0211800	PF3D7_0211800			0211800.1 0211800 asparagine--tRNA ligase asparagine--tRNA ligase Pf3D7_02_v3:475242-477074(+) 610
453	0.128376	0.843838	0.715462	6.79999	7.87917	0	20.78	8	3	3	3	3	PF3D7_0931400	PF3D7_0931400			0931400.1 0931400 conserved Plasmodium protein, unknown function conserved Plasmodium protein, unknown function Pf3D7_09_v3:1263347-1264830(+) 310
452	0.123791	3.15563	3.03184	7.49681	8.79783	0	28.137	26	8	8	8	8	PF3D7_0911900	PF3D7_0911900			0911900.1 0911900 falstatin falstatin Pf3D7_09_v3:538221-539872(-) 413
451	0.122452	-3.16791	-3.29036	5.59347	6.43857	0	6.1506	2	1	1	1	1	PF3D7_1332800	PF3D7_1332800			1332800.1 1332800 eukaryotic translation initiation factor 6, putative eukaryotic translation initiation factor 6, putative Pf3D7_13_v3:1348779-1349522(+) 247
450	0.120487	0.599066	0.478579	6.72783	7.68207	0	31.061	19	11	10	11	10	PF3D7_1351100	PF3D7_1351100			1351100.1 1351100 conserved protein, unknown function conserved protein, unknown function Pf3D7_13_v3:2040405-2041555(-) 156
449	0.118736	5.93065	5.81191	8.33314	9.81026	0	169.53	95	26	24	26	24	PF3D7_0917900	PF3D7_0917900			0917900.1 0917900 heat shock protein 70 heat shock protein 70 Pf3D7_09_v3:737985-740276(+) 652
448	0.116039	1.46919	1.35315	6.99062	8.38856	0	51.164	15	10	10	8	8	PF3D7_1008400	PF3D7_1008400			1008400.1 1008400 26S protease regulatory subunit 4, putative 26S protease regulatory subunit 4, putative Pf3D7_10_v3:347206-348667(-) 448
447	0.115997	1.54008	1.42409	7.01195	8.313	0	21.693	16	7	7	7	7	PF3D7_0113000	PF3D7_0113000			0113000.1 0113000 glutamic acid-rich protein glutamic acid-rich protein Pf3D7_01_v3:487892-490127(-) 673
446	0.11294	2.59895	2.48601	7.33131	8.61005	0	43.293	23	10	12	10	12	PF3D7_1407800	PF3D7_1407800			1407800.1 1407800 plasmepsin IV plasmepsin IV Pf3D7_14_v3:283086-284435(+) 449
445	0.110573	-2.00422	-2.1148	5.94607	7.02526	0	5.3528	4	1	2	1	2	PF3D7_1326100	PF3D7_1326100			1326100.1 1326100 WD repeat-containing protein, putative WD repeat-containing protein, putative Pf3D7_13_v3:1087584-1089099(+) 336
444	0.10927	1.29809	1.18882	6.94042	8.88981	0	195.72	150	54	47	54	47	PF3D7_1452000	PF3D7_1452000			1452000.1 1452000 rhoptry neck protein 2 rhoptry neck protein 2 Pf3D7_14_v3:2134298-2140867(+) 2189
443	0.105297	-3.09646	-3.20176	5.6183	6.6183	0	6.783	5	3	3	3	3	PF3D7_0807300	PF3D7_0807300			0807300.1 0807300 ras-related protein Rab-18 ras-related protein Rab-18 Pf3D7_08_v3:381564-382847(+) 201
442	0.105217	-1.5126	-1.61782	6.0951	6.79407	0	15.63	3	1	2	1	2	PF3D7_1209200	PF3D7_1209200			1209200.1 1209200 U6 snRNA-associated Sm-like protein LSm7, putative U6 snRNA-associated Sm-like protein LSm7, putative Pf3D7_12_v3:427272-427978(+) 108
441	0.100868	-0.566799	-0.667667	6.38066	7.77861	0	10.75	8	5	5	5	5	PF3D7_0505200	PF3D7_0505200			0505200.1 0505200 actin-like protein, putative actin-like protein, putative Pf3D7_05_v3:230695-232392(+) 565
440	0.100729	-0.247322	-0.348051	6.47686	7.89184	0	14.233	13	7	8	7	8	PF3D7_1123400	PF3D7_1123400			1123400.1 1123400 translation elongation factor EF-1, subunit alpha, putative translation elongation factor EF-1, subunit alpha, putative Pf3D7_11_v3:925728-927524(+) 555
439	0.100543	-5.54061	-5.64115	NaN	NaN	0	4.142	1	0	1	0	1	PF3D7_1360700	PF3D7_1360700			1360700.1 1360700 E3 SUMO-protein ligase PIAS, putative E3 SUMO-protein ligase PIAS, putative Pf3D7_13_v3:2426133-2431183(-) 1130
438	0.100472	4.23846	4.13799	7.82727	9.91717	0	323.31	183	49	45	49	45	PF3D7_0730900	PF3D7_0730900			0730900.1 0730900 EMP1-trafficking protein EMP1-trafficking protein Pf3D7_07_v3:1325375-1331813(+) 2110
437	0.0993748	-2.70878	-2.80816	5.73614	7.42635	0	22.808	15	7	8	7	8	PF3D7_1356100	PF3D7_1356100			1356100.1 1356100 conserved Plasmodium protein, unknown function conserved Plasmodium protein, unknown function Pf3D7_13_v3:2224146-2227040(-) 964
436	0.0968285	0.936621	0.839792	6.83402	8.62641	0	104.13	79	29	30	29	30	PF3D7_0932800	PF3D7_0932800			0932800.1 0932800 importin alpha re-exporter, putative importin alpha re-exporter, putative Pf3D7_09_v3:1303390-1307789(-) 1342
435	0.0940647	3.36803	3.27397	7.56647	8.79693	0	36.325	23	11	9	11	9	PF3D7_1216200	PF3D7_1216200			1216200.1 1216200 glycerol-3-phosphate dehydrogenase, putative glycerol-3-phosphate dehydrogenase, putative Pf3D7_12_v3:648889-650552(+) 367
434	0.0921497	2.03051	1.93836	7.16423	9.05073	0	76.224	42	21	22	21	22	PF3D7_0801000	PF3D7_0801000			0801000.1 0801000 Plasmodium exported protein (PHISTc), unknown function Plasmodium exported protein (PHISTc), unknown function Pf3D7_08_v3:84568-88422(-) 1219
433	0.0920658	-0.150394	-0.24246	6.50772	7.86944	0	19.543	13	7	7	7	7	PF3D7_0106100	PF3D7_0106100			0106100.1 0106100 V-type proton ATPase subunit C, putative V-type proton ATPase subunit C, putative Pf3D7_01_v3:260658-261809(-) 383
432	0.0896702	5.51488	5.42521	8.2136	9.80466	0	323.31	174	51	50	51	50	PF3D7_1436300	PF3D7_1436300			1436300.1 1436300 translocon component PTEX150 translocon component PTEX150 Pf3D7_14_v3:1479777-1482758(+) 993
431	0.0884342	1.80903	1.7206	7.09826	7.87643	0	18.907	21	4	6	4	6	PF3D7_0105300	PF3D7_0105300			0105300.1 0105300 cyclase-associated protein cyclase-associated protein Pf3D7_01_v3:225110-225779(-) 162
430	0.085556	-0.588556	-0.674112	6.37709	7.79207	0	36.668	10	5	5	5	5	PF3D7_0717500	PF3D7_0717500			0717500.1 0717500 calcium-dependent protein kinase 4 calcium-dependent protein kinase 4 Pf3D7_07_v3:755763-757696(+) 528
429	0.077898	8.39711	8.31921	9.08354	10.5307	0	323.31	290	58	60	58	60	PF3D7_0922500	PF3D7_0922500			0922500.1 0922500 phosphoglycerate kinase phosphoglycerate kinase Pf3D7_09_v3:913230-914480(+) 416
428	0.0744495	0.0810051	0.00655556	6.58081	7.65999	0	55.245	13	5	6	5	6	PF3D7_1238100	PF3D7_1238100			1238100.1 1238100 calcyclin binding protein, putative calcyclin binding protein, putative Pf3D7_12_v3:1583909-1584595(-) 228
427	0.0731392	-2.89803	-2.97117	5.6843	7.32775	0	20.097	7	3	3	3	3	PF3D7_1120500	PF3D7_1120500			1120500.1 1120500 tRNA nucleotidyltransferase, putative tRNA nucleotidyltransferase, putative Pf3D7_11_v3:772539-775042(+) 791
426	0.0706863	6.10586	6.03517	8.3952	10.0185	0	323.31	296	63	63	63	63	PF3D7_1410400	PF3D7_1410400			1410400.1 1410400 rhoptry-associated protein 1 rhoptry-associated protein 1 Pf3D7_14_v3:420442-422790(+) 782
425	0.068861	1.89472	1.82586	7.12788	8.27402	0	46.001	22	12	11	12	11	PF3D7_0608500	PF3D7_0608500			0608500.1 0608500 proteasome subunit alpha type-2, putative proteasome subunit alpha type-2, putative Pf3D7_06_v3:351780-352775(-) 235
424	0.068552	3.58103	3.51247	7.63557	9.15409	0	98.175	72	30	27	30	27	PF3D7_1350100	PF3D7_1350100			1350100.1 1350100 lysine--tRNA ligase lysine--tRNA ligase Pf3D7_13_v3:2005962-2007950(-) 583
423	0.068285	0.427212	0.358927	6.68623	7.68623	0	8.0336	7	4	4	4	4	PF3D7_1346300	PF3D7_1346300			1346300.1 1346300 DNA/RNA-binding protein Alba 2 DNA/RNA-binding protein Alba 2 Pf3D7_13_v3:1849528-1850517(+) 211
422	0.0664673	0.609039	0.542572	6.74132	7.99659	0	14.275	7	4	4	4	4	PF3D7_0415000	PF3D7_0415000			0415000.1 0415000 arsenical pump-driving ATPase, putative arsenical pump-driving ATPase, putative Pf3D7_04_v3:668578-669717(-) 379
421	0.0654678	5.22992	5.16445	8.13255	9.56391	0	197.85	79	30	32	30	32	PF3D7_1235600	PF3D7_1235600			1235600.1 1235600 serine hydroxymethyltransferase serine hydroxymethyltransferase Pf3D7_12_v3:1484306-1485911(+) 442
420	0.0619373	-1.92024	-1.98218	5.98082	7.67979	0.0043215	2.8513	1	1	1	1	1	PF3D7_0828700	PF3D7_0828700			0828700.1 0828700 conserved Plasmodium protein, unknown function conserved Plasmodium protein, unknown function Pf3D7_08_v3:1233372-1236473(+) 1033
419	0.0600719	7.00888	6.94881	8.66913	10.3319	0	323.31	555	87	81	87	81	PF3D7_0905400	PF3D7_0905400			0905400.1 0905400 high molecular weight rhoptry protein 3 high molecular weight rhoptry protein 3 Pf3D7_09_v3:270740-274789(-) 897
418	0.058403	0.964752	0.906349	6.84998	8.50319	0	83.423	39	23	17	23	17	PF3D7_0404700	PF3D7_0404700			0404700.1 0404700 dipeptidyl aminopeptidase 3 dipeptidyl aminopeptidase 3 Pf3D7_04_v3:260454-263418(-) 939
417	0.0579338	0.0178986	-0.0400353	6.56504	7.88726	0	9.5557	8	6	5	6	5	PF3D7_0831500	PF3D7_0831500			0831500.1 0831500 Plasmodium exported protein (PHIST), unknown function Plasmodium exported protein (PHIST), unknown function Pf3D7_08_v3:1353456-1354669(+) 335
416	0.0576305	1.17163	1.114	6.91241	8.27413	0	30.769	31	10	13	10	13	PF3D7_0217900	PF3D7_0217900			0217900.1 0217900 conserved Plasmodium protein, unknown function conserved Plasmodium protein, unknown function Pf3D7_02_v3:735438-736997(-) 519
415	0.0539284	3.01	2.95607	7.46654	8.74529	0	48.831	31	13	14	13	14	PF3D7_1127600	PF3D7_1127600			1127600.1 1127600 CRAL/TRIO domain-containing protein, putative CRAL/TRIO domain-containing protein, putative Pf3D7_11_v3:1071752-1073813(+) 297
414	0.0533161	8.80768	8.75436	9.21192	10.513	0	323.31	264	41	41	41	41	PF3D7_1444800	PF3D7_1444800			1444800.1 1444800 fructose-bisphosphate aldolase fructose-bisphosphate aldolase Pf3D7_14_v3:1844041-1845617(-) 369
413	0.0518341	-1.39205	-1.44389	6.14179	7.04489	0	8.7148	8	3	3	3	3	PF3D7_1017500	PF3D7_1017500			1017500.1 1017500 conserved Plasmodium protein, unknown function conserved Plasmodium protein, unknown function Pf3D7_10_v3:701746-702422(+) 134
412	0.0516872	1.50914	1.45746	7.01519	8.2193	0	32.559	26	12	11	12	11	PF3D7_1001700	PF3D7_1001700			1001700.1 1001700 Plasmodium exported protein (PHISTc), unknown function Plasmodium exported protein (PHISTc), unknown function Pf3D7_10_v3:92573-93526(-) 266
411	0.049406	6.31556	6.26615	8.4625	9.82423	0	291.27	139	42	41	42	41	PF3D7_1124600	PF3D7_1124600			1124600.1 1124600 ethanolamine kinase ethanolamine kinase Pf3D7_11_v3:970105-971376(-) 423
410	0.0369778	3.80142	3.76444	7.70811	8.85424	0	50.726	28	8	8	8	8	PF3D7_0730800.2;PF3D7_0730800	PF3D7_0730800.2;PF3D7_0730800			0730800.2 0730800 Plasmodium exported protein, unknown function, unspecified product unspecified product Pf3D7_07_v3:1321306-1322367(+) 293;0730800.1 0730800 Plasmodium exported protein, unknown function, unspecified product Plasmodium exported pro
409	0.0361061	-0.942001	-0.978108	6.28037	7.62279	0	16.757	11	5	5	5	5	PF3D7_1115400	PF3D7_1115400			1115400.1 1115400 cysteine proteinase falcipain 3 cysteine proteinase falcipain 3 Pf3D7_11_v3:584328-585806(-) 492
408	0.032732	-0.95372	-0.986452	6.27749	7.72466	0	9.448	7	5	4	5	4	PF3D7_1337800	PF3D7_1337800			1337800.1 1337800 calcium-dependent protein kinase 5 calcium-dependent protein kinase 5 Pf3D7_13_v3:1528502-1530208(-) 568
407	0.0314598	-2.16863	-2.20009	5.91204	7.16732	0.007544	2.575	3	1	1	1	1	PF3D7_0213100	PF3D7_0213100			0213100.1 0213100 protein SIS1 protein SIS1 Pf3D7_02_v3:537789-539420(+) 328
406	0.0314465	2.83838	2.80693	7.41931	8.67459	0	62.097	30	15	15	15	15	PF3D7_0812400	PF3D7_0812400			0812400.1 0812400 karyopherin alpha karyopherin alpha Pf3D7_08_v3:621805-623442(-) 545
405	0.0284176	2.5702	2.54179	7.33917	8.75415	0	37.354	21	7	7	7	7	PF3D7_1476300	PF3D7_1476300			1476300.1 1476300 Plasmodium exported protein (PHISTb), unknown function Plasmodium exported protein (PHISTb), unknown function Pf3D7_14_v3:3139140-3140982(+) 572
404	0.0275402	1.25876	1.23122	6.94456	7.98595	0	66.913	14	6	7	6	7	PF3D7_0108000	PF3D7_0108000			0108000.1 0108000 proteasome subunit beta type-3, putative proteasome subunit beta type-3, putative Pf3D7_01_v3:328431-329558(-) 218
403	0.0248604	0.289166	0.264305	6.65321	9.15836	0.0083403	2.51	4	2	2	2	2	PF3D7_0905300	PF3D7_0905300			0905300.1 0905300 dynein heavy chain, putative dynein heavy chain, putative Pf3D7_09_v3:251353-269709(-) 6118
402	0.0192051	-2.35624	-2.37545	5.85798	7.49145	0	11.224	4	3	3	3	3	PF3D7_1328500	PF3D7_1328500			1328500.1 1328500 alpha/beta-hydrolase, putative alpha/beta-hydrolase, putative Pf3D7_13_v3:1204186-1207200(-) 1004
401	0.0128975	5.40034	5.38745	8.19421	9.64136	0	279.87	124	41	42	41	42	PF3D7_1406300	PF3D7_1406300			1406300.1 1406300 glycerophosphodiester phosphodiesterase glycerophosphodiester phosphodiesterase Pf3D7_14_v3:228410-229837(+) 475
400	0.00911331	2.42022	2.41111	7.29785	8.92109	0	123.07	39	19	19	19	19	PF3D7_1138500	PF3D7_1138500			1138500.1 1138500 protein phosphatase 2C protein phosphatase 2C Pf3D7_11_v3:1518464-1521238(+) 924
399	0.00273705	-1.2562	-1.25893	6.1924	8.00531	0	77.19	41	22	23	22	23	PF3D7_1136300	PF3D7_1136300			1136300.1 1136300 tudor staphylococcal nuclease tudor staphylococcal nuclease Pf3D7_11_v3:1422744-1426201(+) 1098
398	0.00155067	-1.27263	-1.27418	6.18769	7.87787	0	27.056	16	7	11	7	11	PF3D7_1363400	PF3D7_1363400			1363400.1 1363400 polyubiquitin binding protein, putative polyubiquitin binding protein, putative Pf3D7_13_v3:2543644-2546483(-) 905
397	-0.00201035	0.170116	0.172127	6.62271	7.7988	0	11.038	6	5	4	5	4	PF3D7_0728000	PF3D7_0728000			0728000.1 0728000 eukaryotic translation initiation factor 2 subunit alpha, putative eukaryotic translation initiation factor 2 subunit alpha, putative Pf3D7_07_v3:1191179-1192289(-) 329
396	-0.0098877	-1.78239	-1.7725	6.03651	8.01423	0	83.249	22	9	11	9	11	PF3D7_0424200	PF3D7_0424200			0424200.1 0424200 reticulocyte binding protein homologue 4 reticulocyte binding protein homologue 4 Pf3D7_04_v3:1085979-1091277(-) 1716
395	-0.0137272	3.96968	3.9834	7.76882	9.09103	0	77.067	79	26	24	26	24	PF3D7_1338300	PF3D7_1338300			1338300.1 1338300 elongation factor 1-gamma, putative elongation factor 1-gamma, putative Pf3D7_13_v3:1548692-1550396(+) 411
394	-0.0153713	7.09802	7.1134	8.71087	9.94132	0	323.31	203	27	30	26	28	PF3D7_0818200;A2IDB2	PF3D7_0818200			0818200.1 0818200 14-3-3 protein 14-3-3 protein Pf3D7_08_v3:830006-831454(+) 262
393	-0.0158176	0.0381336	0.0539513	6.58572	7.73185	0	12.949	16	6	6	6	6	PF3D7_1328100	PF3D7_1328100			1328100.1 1328100 proteasome subunit beta type-7, putative proteasome subunit beta type-7, putative Pf3D7_13_v3:1184208-1185020(+) 270
392	-0.0203819	5.07379	5.09418	8.1025	9.30664	0	124.45	74	17	18	17	18	PF3D7_1361900	PF3D7_1361900			1361900.1 1361900 proliferating cell nuclear antigen 1 proliferating cell nuclear antigen 1 Pf3D7_13_v3:2482472-2483296(-) 274
391	-0.0215836	2.33764	2.35922	7.2791	8.55786	0	61.319	25	9	9	9	9	PF3D7_0320500	PF3D7_0320500			0320500.1 0320500 nicotinamidase, putative nicotinamidase, putative Pf3D7_03_v3:860813-862102(+) 429
390	-0.0254936	1.47511	1.5006	7.02024	8.16634	0	20.63	25	7	7	7	7	PF3D7_0931800	PF3D7_0931800			0931800.1 0931800 proteasome subunit beta type-6, putative proteasome subunit beta type-6, putative Pf3D7_09_v3:1273082-1273930(-) 282
389	-0.0255756	3.51576	3.54133	7.63454	9.30664	0	140.37	104	43	42	43	42	PF3D7_1454400;REV__PF3D7_0618700	PF3D7_1454400			1454400.1 1454400 aminopeptidase P aminopeptidase P Pf3D7_14_v3:2234143-2236476(+) 777
388	-0.0289269	-1.55495	-1.52602	6.10877	7.4512	0	17.2	4	2	3	2	3	PF3D7_0804900	PF3D7_0804900			0804900.1 0804900 GTPase-activating protein, putative GTPase-activating protein, putative Pf3D7_08_v3:279711-281186(-) 491
387	-0.0361156	0.506779	0.542894	6.73085	8.12879	0	45.726	14	7	8	7	8	PF3D7_0527200	PF3D7_0527200			0527200.1 0527200 ubiquitin carboxyl-terminal hydrolase 14 ubiquitin carboxyl-terminal hydrolase 14 Pf3D7_05_v3:1132937-1134854(-) 605
386	-0.0388012	0.254135	0.292936	6.65534	8.28881	0	32.205	26	9	8	9	8	PF3D7_0618000	PF3D7_0618000			0618000.1 0618000 conserved Plasmodium membrane protein, unknown function conserved Plasmodium membrane protein, unknown function Pf3D7_06_v3:758609-760996(+) 795
385	-0.0413551	2.93573	2.97708	7.4631	8.74185	0	42.302	24	13	14	13	14	PF3D7_0626700	PF3D7_0626700			0626700.1 0626700 conserved protein, unknown function conserved protein, unknown function Pf3D7_06_v3:1075018-1076136(+) 372
384	-0.0437241	-1.12382	-1.0801	6.24152	7.44564	0.0035619	3.1254	2	2	2	2	2	PF3D7_1128100	PF3D7_1128100			1128100.1 1128100 prefoldin subunit 5, putative prefoldin subunit 5, putative Pf3D7_11_v3:1094909-1095931(-) 248
383	-0.0535069	0.553116	0.606623	6.7483	8.26682	0	44.335	29	9	9	9	9	PF3D7_0507500	PF3D7_0507500			0507500.1 0507500 subtilisin-like protease 1 subtilisin-like protease 1 Pf3D7_05_v3:307490-309556(-) 688
382	-0.0587406	5.43643	5.49517	8.21937	10.0519	0	323.31	410	88	87	88	87	PF3D7_1311800	PF3D7_1311800			1311800.1 1311800 M1-family alanyl aminopeptidase M1-family alanyl aminopeptidase Pf3D7_13_v3:501790-505047(+) 1085
381	-0.062809	-3.76886	-3.70605	5.44912	6.79155	0	19.825	10	5	5	5	5	PF3D7_0914700	PF3D7_0914700			0914700.1 0914700 major facilitator superfamily-related transporter, putative major facilitator superfamily-related transporter, putative Pf3D7_09_v3:630657-632207(+) 516
380	-0.064909	-1.83193	-1.76702	6.03262	7.53777	0	11.108	10	4	4	4	4	PF3D7_0507700	PF3D7_0507700			0507700.1 0507700 nuclear protein localization protein 4, putative nuclear protein localization protein 4, putative Pf3D7_05_v3:316766-318361(-) 531
379	-0.0666237	-0.117254	-0.0506306	6.54914	8.28153	0	33.283	21	12	14	12	14	PF3D7_1344200	PF3D7_1344200			1344200.1 1344200 heat shock protein 110, putative heat shock protein 110, putative Pf3D7_13_v3:1769129-1771927(+) 932
378	-0.0675087	3.88765	3.95516	7.75491	9.13513	0	110.87	64	21	25	21	25	PF3D7_1454700	PF3D7_1454700			1454700.1 1454700 6-phosphogluconate dehydrogenase, decarboxylating, putative 6-phosphogluconate dehydrogenase, decarboxylating, putative Pf3D7_14_v3:2241433-2242839(+) 468
377	-0.0707169	1.17915	1.24987	6.94022	8.28264	0	22.081	13	9	10	9	10	PF3D7_0908000	PF3D7_0908000			0908000.1 0908000 P1 nuclease, putative P1 nuclease, putative Pf3D7_09_v3:369870-371554(-) 416
376	-0.0720577	0.802805	0.874863	6.8272	8.3954	0	43.582	25	6	6	6	6	PF3D7_1002100	PF3D7_1002100			1002100.1 1002100 EMP1-trafficking protein EMP1-trafficking protein Pf3D7_10_v3:106653-108662(-) 631
375	-0.076004	3.32853	3.40453	7.58832	9.09346	0	202.13	62	27	27	27	27	PF3D7_0306800	PF3D7_0306800			0306800.1 0306800 T-complex protein 1 subunit beta T-complex protein 1 subunit beta Pf3D7_03_v3:306108-307984(-) 533
374	-0.0780621	4.41276	4.49082	7.91513	9.06126	0	107.6	72	19	17	19	17	PF3D7_0424600	PF3D7_0424600			0424600.1 0424600 Plasmodium exported protein (PHISTb), unknown function Plasmodium exported protein (PHISTb), unknown function Pf3D7_04_v3:1113345-1114486(-) 309
373	-0.0786724	1.11203	1.1907	6.92162	8.1769	0	16.674	10	6	8	6	8	PF3D7_1030500	PF3D7_1030500			1030500.1 1030500 26S proteasome regulatory subunit RPN9, putative 26S proteasome regulatory subunit RPN9, putative Pf3D7_10_v3:1244215-1245396(+) 393
372	-0.0797729	0.968601	1.04837	6.87867	7.78176	0	23.758	18	7	7	7	7	PF3D7_1426100	PF3D7_1426100			1426100.1 1426100 basic transcription factor 3b, putative basic transcription factor 3b, putative Pf3D7_14_v3:1018745-1019260(-) 171
371	-0.0816212	3.83439	3.91601	7.74173	9.12195	0	65.721	42	16	17	16	17	PF3D7_1401600	PF3D7_1401600			1401600.1 1401600 Plasmodium exported protein (PHISTb), unknown function Plasmodium exported protein (PHISTb), unknown function Pf3D7_14_v3:61364-62988(-) 478
370	-0.0838509	5.8079	5.89175	8.33628	9.45022	0	118.15	49	15	16	15	16	PF3D7_1427900;REV__PF3D7_1425700	PF3D7_1427900			1427900.1 1427900 conserved protein, unknown function conserved protein, unknown function Pf3D7_14_v3:1092936-1093781(+) 281
369	-0.0841312	-1.07116	-0.987034	6.26553	7.77067	0	25.057	10	8	7	8	7	PF3D7_1456700	PF3D7_1456700			1456700.1 1456700 conserved Plasmodium protein, unknown function conserved Plasmodium protein, unknown function Pf3D7_14_v3:2323772-2325826(-) 684
368	-0.0842018	3.75801	3.84221	7.71926	8.79845	0	57.311	52	11	14	11	14	PF3D7_1438900	PF3D7_1438900			1438900.1 1438900 thioredoxin peroxidase 1 thioredoxin peroxidase 1 Pf3D7_14_v3:1575984-1576571(+) 195
367	-0.0865212	1.97465	2.06117	7.1829	8.35898	0	17.042	19	6	6	6	6	PF3D7_1353100	PF3D7_1353100			1353100.1 1353100 Plasmodium exported protein, unknown function Plasmodium exported protein, unknown function Pf3D7_13_v3:2124272-2125270(-) 285
366	-0.0870209	5.46528	5.5523	8.23378	9.556	0	196.82	96	25	26	9	10	PF3D7_0903700;F8VXZ4;C9J2C0;F5H5D3;Q9NY65-2;G3V1U9;Q9NY65;Q9BQE3;Q13748;Q71U36;Q6PEY2;Q13748-2	PF3D7_0903700			0903700.1 0903700 alpha tubulin 1 alpha tubulin 1 Pf3D7_09_v3:175542-177442(+) 453
365	-0.0878544	0.81134	0.899195	6.83297	8.55724	0	70.911	60	20	22	20	22	PF3D7_0205900	PF3D7_0205900			0205900.1 0205900 26S proteasome regulatory subunit RPN1, putative 26S proteasome regulatory subunit RPN1, putative Pf3D7_02_v3:235237-238816(+) 966
364	-0.0921135	1.814	1.90612	7.13567	8.62703	0	48.494	41	16	16	16	16	PF3D7_1472600	PF3D7_1472600			1472600.1 1472600 protein disulfide-isomerase protein disulfide-isomerase Pf3D7_14_v3:2962986-2965086(-) 553
363	-0.092947	2.0816	2.17455	7.2164	8.33035	0	16.078	19	5	6	5	6	PF3D7_0301700	PF3D7_0301700			0301700.1 0301700 Plasmodium exported protein, unknown function Plasmodium exported protein, unknown function Pf3D7_03_v3:96568-97907(-) 317
362	-0.0939465	3.94176	4.03571	7.77656	8.81795	0	149.87	59	15	15	15	15	PF3D7_0627500	PF3D7_0627500			0627500.1 0627500 protein DJ-1 protein DJ-1 Pf3D7_06_v3:1101734-1102852(-) 189
361	-0.094038	0.655079	0.749117	6.78718	8.16741	0	45.867	31	12	11	12	11	PF3D7_0204500	PF3D7_0204500			0204500.1 0204500 aspartate transaminase aspartate transaminase Pf3D7_02_v3:198353-199570(-) 405
360	-0.0962744	-5.61956	-5.52328	4.89879	6.45509	0	5.0072	4	3	3	3	3	PF3D7_1430200	PF3D7_1430200			1430200.1 1430200 plasmepsin IX plasmepsin IX Pf3D7_14_v3:1188349-1191466(+) 627
359	-0.0964832	-2.43123	-2.33474	5.85861	7.46067	0	19.018	15	7	10	7	10	PF3D7_0926700	PF3D7_0926700			0926700.1 0926700 glutamine-dependent NAD(+) synthetase, putative glutamine-dependent NAD(+) synthetase, putative Pf3D7_09_v3:1089911-1092430(+) 839
358	-0.0990448	9.00045	9.09949	9.30042	10.6984	0	323.31	383	62	70	60	68	PF3D7_1015900	PF3D7_1015900			1015900.1 1015900 enolase enolase Pf3D7_10_v3:637138-639011(+) 446
357	-0.0998611	-0.923679	-0.823818	6.31311	7.59187	0	5.7855	7	3	3	3	3	PF3D7_1023200;PF3D7_1004200	PF3D7_1023200			1023200.1 1023200 orotidine 5-phosphate decarboxylase orotidine 5-phosphate decarboxylase Pf3D7_10_v3:982231-983202(+) 323
356	-0.103857	5.1524	5.25626	8.14301	9.55798	0	141.52	104	33	34	33	34	PF3D7_1223100	PF3D7_1223100			1223100.1 1223100 cAMP-dependent protein kinase regulatory subunit cAMP-dependent protein kinase regulatory subunit Pf3D7_12_v3:927825-929991(-) 441
355	-0.107025	-0.539257	-0.432232	6.4303	7.33339	0	22.41	7	2	4	2	4	PF3D7_1006200	PF3D7_1006200			1006200.1 1006200 DNA/RNA-binding protein Alba 3 DNA/RNA-binding protein Alba 3 Pf3D7_10_v3:262150-262997(-) 107
354	-0.110323	3.83615	3.94647	7.74809	9.57417	0	289.27	194	66	65	66	65	PF3D7_0811600	PF3D7_0811600			0811600.1 0811600 conserved Plasmodium protein, unknown function conserved Plasmodium protein, unknown function Pf3D7_08_v3:582983-586953(-) 1210
353	-0.112959	3.12682	3.23978	7.5351	8.87753	0	92.74	42	16	18	16	18	PF3D7_1354500	PF3D7_1354500			1354500.1 1354500 adenylosuccinate synthetase adenylosuccinate synthetase Pf3D7_13_v3:2174346-2175797(+) 442
352	-0.113066	6.66097	6.77403	8.59901	9.90004	0	90.449	119	26	28	26	28	PF3D7_1029600	PF3D7_1029600			1029600.1 1029600 adenosine deaminase adenosine deaminase Pf3D7_10_v3:1206302-1207405(+) 367
351	-0.12018	1.35646	1.47664	7.00363	8.17975	0	33.867	32	12	13	12	13	PF3D7_1212000	PF3D7_1212000			1212000.1 1212000 glutathione peroxidase-like thioredoxin peroxidase glutathione peroxidase-like thioredoxin peroxidase Pf3D7_12_v3:534912-535915(-) 205
350	-0.128612	0.643085	0.771698	6.79062	8.04591	0	14.38	8	4	6	4	6	PF3D7_1136500;PF3D7_1136500.2;J3QQI9;B0QY36;H0Y645;K7ESB6;B0QY35;B0QY34;H7BYT1;E7EVD0;B4DSH2;Q9HCP0-2;P48730-2;P78368;P48730;P49674;Q9HCP0;Q9Y6M4-3;A8K040;Q9Y6M4;Q9Y6M4-2	PF3D7_1136500;PF3D7_1136500.2			1136500.1 1136500 casein kinase 1 casein kinase 1 Pf3D7_11_v3:1433141-1435170(-) 323;1136500.2 1136500 casein kinase 1 casein kinase 1 Pf3D7_11_v3:1431881-1435170(-) 324
349	-0.130388	-0.578701	-0.448313	6.4232	7.59928	0	6.6988	4	1	3	1	3	PF3D7_1403900	PF3D7_1403900			1403900.1 1403900 serine/threonine protein phosphatase CPPED1, putative serine/threonine protein phosphatase CPPED1, putative Pf3D7_14_v3:142242-143138(-) 298
348	-0.130581	2.23264	2.36322	7.26954	8.11461	0	52.347	23	7	6	7	6	PF3D7_1351800;PF3D7_1351800.2	PF3D7_1351800;PF3D7_1351800.2			1351800.1 1351800 conserved Plasmodium protein, unknown function conserved Plasmodium protein, unknown function Pf3D7_13_v3:2065373-2066409(+) 230;1351800.2 1351800 conserved Plasmodium protein, unknown function conserved Plasmodium protein, unknow
347	-0.130819	-4.14012	-4.0093	5.18384	6.41429	0	18.413	4	0	3	0	3	PF3D7_1001900	PF3D7_1001900			1001900.1 1001900 Plasmodium exported protein (hyp16), unknown function Plasmodium exported protein (hyp16), unknown function Pf3D7_10_v3:99379-100361(-) 276
346	-0.130871	3.52152	3.65239	7.65758	8.88803	0	76.138	30	11	13	11	13	PF3D7_0807900	PF3D7_0807900			0807900.1 0807900 tyrosine--tRNA ligase tyrosine--tRNA ligase Pf3D7_08_v3:402595-404141(+) 373
345	-0.134432	0.847263	0.981695	6.85328	8.02938	0	34.595	28	11	13	11	13	PF3D7_1470900	PF3D7_1470900			1470900.1 1470900 proteasome subunit beta type-2, putative proteasome subunit beta type-2, putative Pf3D7_14_v3:2897916-2898657(+) 195
344	-0.137846	0.666471	0.804318	6.79955	8.67461	0	74.883	34	19	20	19	20	PF3D7_1367700	PF3D7_1367700			1367700.1 1367700 alanine--tRNA ligase alanine--tRNA ligase Pf3D7_13_v3:2695655-2699881(+) 1408
343	-0.14694	0.327549	0.474489	6.6994	7.77858	0	15.409	11	4	6	4	6	PF3D7_1011400	PF3D7_1011400			1011400.1 1011400 proteasome subunit beta type-5 proteasome subunit beta type-5 Pf3D7_10_v3:441140-441955(-) 271
342	-0.147078	0.925322	1.0724	6.87937	7.87937	0	12.987	9	6	5	6	5	PF3D7_1414000	PF3D7_1414000			1414000.1 1414000 26S proteasome regulatory subunit RPN13, putative 26S proteasome regulatory subunit RPN13, putative Pf3D7_14_v3:553639-555772(-) 253
341	-0.147964	3.97932	4.12729	7.7989	8.57705	0	25.271	24	7	9	7	9	PF3D7_1229400	PF3D7_1229400			1229400.1 1229400 macrophage migration inhibitory factor macrophage migration inhibitory factor Pf3D7_12_v3:1208912-1209542(+) 116
340	-0.150656	0.662804	0.813459	6.80108	8.10212	0	22.334	13	7	7	7	7	PF3D7_0906500	PF3D7_0906500			0906500.1 0906500 arginase arginase Pf3D7_09_v3:318311-319546(+) 411
339	-0.152054	2.18365	2.33571	7.25919	8.16227	0	10.235	9	4	4	4	4	PF3D7_1370300	PF3D7_1370300			1370300.1 1370300 membrane associated histidine-rich protein membrane associated histidine-rich protein Pf3D7_13_v3:2787972-2788913(+) 249
338	-0.153738	5.13978	5.29352	8.1494	9.26335	0	53.528	37	14	14	14	14	PF3D7_0913200	PF3D7_0913200			0913200.1 0913200 elongation factor 1-beta elongation factor 1-beta Pf3D7_09_v3:575679-576509(+) 276
337	-0.154348	4.87489	5.02924	8.06982	9.64959	0	293.59	140	43	51	38	46	PF3D7_0708400	PF3D7_0708400			0708400.1 0708400 heat shock protein 90 heat shock protein 90 Pf3D7_07_v3:381592-384614(+) 745
336	-0.156208	2.2339	2.39011	7.27515	8.80664	0	63.743	41	20	21	20	21	PF3D7_1132200	PF3D7_1132200			1132200.1 1132200 T-complex protein 1 subunit alpha T-complex protein 1 subunit alpha Pf3D7_11_v3:1248310-1250232(-) 544
335	-0.156611	-2.65165	-2.49505	5.80456	7.52056	0	38.048	10	5	7	5	7	PF3D7_0517400	PF3D7_0517400			0517400.1 0517400 FACT complex subunit SPT16, putative FACT complex subunit SPT16, putative Pf3D7_05_v3:731407-735162(+) 1141
334	-0.157156	2.64424	2.80139	7.39889	8.96709	0	111.78	56	18	24	17	23	PF3D7_0731600	PF3D7_0731600			0731600.1 0731600 acyl-CoA synthetase acyl-CoA synthetase Pf3D7_07_v3:1368161-1370596(+) 811
333	-0.157848	3.46433	3.62217	7.64589	8.64589	0	38.889	29	9	8	9	8	PF3D7_0621800	PF3D7_0621800			0621800.1 0621800 nascent polypeptide-associated complex subunit alpha, putative nascent polypeptide-associated complex subunit alpha, putative Pf3D7_06_v3:891997-892777(+) 184
332	-0.162014	5.00713	5.16914	8.1112	9.15259	0	74.185	45	11	11	11	11	PF3D7_1113400	PF3D7_1113400			1113400.1 1113400 ubiquitin domain-containing protein DSK2, putative ubiquitin domain-containing protein DSK2, putative Pf3D7_11_v3:521122-522824(-) 388
331	-0.16469	3.57988	3.74457	7.68211	9.20063	0	119.58	75	24	26	24	26	PF3D7_1446200	PF3D7_1446200			1446200.1 1446200 M17 leucyl aminopeptidase M17 leucyl aminopeptidase Pf3D7_14_v3:1893200-1895017(-) 605
330	-0.165968	5.99449	6.16046	8.40924	9.94072	0	323.31	252	60	61	60	61	PF3D7_0511800	PF3D7_0511800			0511800.1 0511800 inositol-3-phosphate synthase inositol-3-phosphate synthase Pf3D7_05_v3:520720-522693(-) 604
329	-0.166674	-2.72158	-2.55491	5.78558	7.08661	0	4.4391	2	2	2	2	2	PF3D7_1472900	PF3D7_1472900			1472900.1 1472900 dihydroorotase, putative dihydroorotase, putative Pf3D7_14_v3:2972978-2974054(+) 358
328	-0.167465	4.69903	4.86649	8.01957	9.22368	0	50.392	45	14	17	14	17	PF3D7_1203700	PF3D7_1203700			1203700.1 1203700 nucleosome assembly protein nucleosome assembly protein Pf3D7_12_v3:187146-188842(-) 347
327	-0.169535	-3.47055	-3.30102	5.56071	6.90312	0.0075694	2.5923	2	1	1	1	1	PF3D7_0617200	PF3D7_0617200			0617200.1 0617200 conserved Plasmodium protein, unknown function conserved Plasmodium protein, unknown function Pf3D7_06_v3:717050-718917(+) 446
326	-0.169548	-0.353386	-0.183838	6.49907	7.77782	0	8.7592	5	2	3	2	3	PF3D7_1247400	PF3D7_1247400			1247400.1 1247400 peptidyl-prolyl cis-trans isomerase FKBP35 peptidyl-prolyl cis-trans isomerase FKBP35 Pf3D7_12_v3:1955124-1956038(-) 304
325	-0.170212	-4.17555	-4.00534	5.34862	6.79577	0	4.6731	2	2	1	2	1	PF3D7_0507200	PF3D7_0507200			0507200.1 0507200 subtilisin-like protease 3 subtilisin-like protease 3 Pf3D7_05_v3:298427-300736(-) 769
324	-0.173477	5.08041	5.25389	8.13561	8.43666	0	8.1747	9	2	2	2	2	PF3D7_0108500	PF3D7_0108500			0108500.1 0108500 conserved Plasmodium protein, unknown function conserved Plasmodium protein, unknown function Pf3D7_01_v3:349170-349709(+) 179
323	-0.179098	1.41448	1.59358	7.03322	8.4482	0	53.332	26	13	14	13	14	PF3D7_1442300	PF3D7_1442300			1442300.1 1442300 tRNA import protein tRIP tRNA import protein tRIP Pf3D7_14_v3:1712626-1714065(-) 402
322	-0.179565	-3.06712	-2.88756	5.68423	6.63847	0	4.3916	4	2	1	2	1	PF3D7_1434200	PF3D7_1434200			1434200.1 1434200 calmodulin calmodulin Pf3D7_14_v3:1368815-1369796(-) 149
321	-0.183229	-1.02934	-0.846109	6.29842	7.52888	0	8.3257	5	3	3	3	3	PF3D7_1217900	PF3D7_1217900			1217900.1 1217900 PPPDE peptidase domain-containing protein, putative PPPDE peptidase domain-containing protein, putative Pf3D7_12_v3:700531-702211(+) 483
320	-0.188204	0.844282	1.03249	6.86347	8.60383	0	63.076	41	22	23	22	23	PF3D7_0627700	PF3D7_0627700			0627700.1 0627700 transportin transportin Pf3D7_06_v3:1108197-1111640(+) 1147
319	-0.192511	3.08176	3.27427	7.53792	9.35083	0	234.04	129	46	50	46	50	PF3D7_1360800	PF3D7_1360800			1360800.1 1360800 falcilysin falcilysin Pf3D7_13_v3:2435343-2438924(+) 1193
318	-0.194765	-0.124069	0.0706959	6.57334	7.89555	0	14.207	7	3	4	3	4	PF3D7_0807800	PF3D7_0807800			0807800.1 0807800 26S proteasome regulatory subunit RPN10, putative 26S proteasome regulatory subunit RPN10, putative Pf3D7_08_v3:399591-401360(-) 481
317	-0.196928	-3.62202	-3.42509	5.52077	7.3841	0	44.368	15	9	8	9	8	PF3D7_0621100	PF3D7_0621100			0621100.1 0621100 conserved Plasmodium protein, unknown function conserved Plasmodium protein, unknown function Pf3D7_06_v3:865845-869909(-) 1354
316	-0.198099	-2.79872	-2.60062	5.76887	7.0911	0	12.16	7	6	7	6	7	PF3D7_1456800	PF3D7_1456800			1456800.1 1456800 V-type H(+)-translocating pyrophosphatase, putative V-type H(+)-translocating pyrophosphatase, putative Pf3D7_14_v3:2329933-2332086(-) 717
315	-0.206034	1.27048	1.47652	6.99547	7.89856	0	26.175	12	8	6	8	6	PF3D7_0305700	PF3D7_0305700			0305700.1 0305700 ubiquitin-conjugating enzyme E2, putative ubiquitin-conjugating enzyme E2, putative Pf3D7_03_v3:278956-279828(-) 142
314	-0.207811	-2.14292	-1.93511	5.9683	7.17243	0	6.8763	4	4	2	4	2	PF3D7_0219700	PF3D7_0219700			0219700.1 0219700 Plasmodium exported protein (PHISTc), unknown function Plasmodium exported protein (PHISTc), unknown function Pf3D7_02_v3:783723-784828(-) 295
313	-0.213242	1.16285	1.3761	6.96457	8.54435	0	52.944	28	12	12	12	12	PF3D7_1104000	PF3D7_1104000			1104000.1 1104000 phenylalanine--tRNA ligase beta subunit phenylalanine--tRNA ligase beta subunit Pf3D7_11_v3:175608-177778(-) 623
312	-0.214081	6.71166	6.92574	8.6351	9.99683	0	162.71	153	35	40	35	40	PF3D7_0608800	PF3D7_0608800			0608800.1 0608800 ornithine aminotransferase ornithine aminotransferase Pf3D7_06_v3:362635-363879(+) 414
311	-0.221018	0.888914	1.10993	6.88373	8.74705	0	211.24	105	41	43	41	43	PF3D7_0302900	PF3D7_0302900			0302900.1 0302900 exportin-1, putative exportin-1, putative Pf3D7_03_v3:152168-156146(-) 1254
310	-0.222157	5.10301	5.32517	8.15253	9.5839	0	290.06	138	40	40	40	40	PF3D7_0624000	PF3D7_0624000			0624000.1 0624000 hexokinase hexokinase Pf3D7_06_v3:981066-982547(+) 493
309	-0.222891	0.430513	0.653404	6.74613	7.74613	0	31.2	16	5	6	5	6	PF3D7_0814900	PF3D7_0814900			0814900.1 0814900 superoxide dismutase [Fe] superoxide dismutase [Fe] Pf3D7_08_v3:708228-708824(+) 198
308	-0.227732	4.22542	4.45315	7.88952	9.36665	0	237.62	108	37	40	37	40	PF3D7_1436000	PF3D7_1436000			1436000.1 1436000 glucose-6-phosphate isomerase glucose-6-phosphate isomerase Pf3D7_14_v3:1458131-1459870(+) 579
307	-0.229269	4.37283	4.6021	7.93422	8.77932	0	169.59	55	10	10	10	10	PF3D7_0322000	PF3D7_0322000			0322000.1 0322000 peptidyl-prolyl cis-trans isomerase peptidyl-prolyl cis-trans isomerase Pf3D7_03_v3:928644-929159(-) 171
306	-0.231035	-0.551718	-0.320682	6.45215	7.89931	0	20.948	13	6	8	6	8	PF3D7_1012500	PF3D7_1012500			1012500.1 1012500 phosphoglucomutase, putative phosphoglucomutase, putative Pf3D7_10_v3:478758-480539(-) 593
305	-0.231089	3.40842	3.63951	7.64427	9.09142	0	116.17	74	22	22	22	22	PF3D7_0532300	PF3D7_0532300			0532300.1 0532300 Plasmodium exported protein (PHISTb), unknown function Plasmodium exported protein (PHISTb), unknown function Pf3D7_05_v3:1308278-1309940(+) 509
304	-0.233631	-0.0722199	0.161411	6.59704	7.71097	0	13.896	15	4	5	4	5	PF3D7_1001800	PF3D7_1001800			1001800.1 1001800 Plasmodium exported protein (PHISTc), unknown function Plasmodium exported protein (PHISTc), unknown function Pf3D7_10_v3:96113-97031(-) 260
303	-0.235388	-1.64604	-1.41066	6.12362	7.5708	0	4.5371	3	2	2	2	2	PF3D7_0802800	PF3D7_0802800			0802800.1 0802800 serine/threonine protein phosphatase 2B catalytic subunit A serine/threonine protein phosphatase 2B catalytic subunit A Pf3D7_08_v3:191976-194103(+) 604
302	-0.238001	2.3238	2.5618	7.31923	8.7342	0	66.518	39	18	18	18	18	PF3D7_1347700	PF3D7_1347700			1347700.1 1347700 ethanolamine-phosphate cytidylyltransferase ethanolamine-phosphate cytidylyltransferase Pf3D7_13_v3:1908960-1910885(+) 573
301	-0.239937	2.22264	2.46257	7.28917	8.73633	0	75.796	33	16	16	16	16	PF3D7_0309500	PF3D7_0309500			0309500.1 0309500 asparagine synthetase [glutamine-hydrolyzing], putative asparagine synthetase [glutamine-hydrolyzing], putative Pf3D7_03_v3:402933-405440(+) 610
300	-0.241426	6.05199	6.29341	8.44224	9.72099	0	140.29	126	34	36	34	36	PF3D7_0922200	PF3D7_0922200			0922200.1 0922200 S-adenosylmethionine synthetase S-adenosylmethionine synthetase Pf3D7_09_v3:903362-904570(+) 402
299	-0.241751	3.86569	4.10744	7.78417	8.96026	0	78.794	47	13	14	13	14	PF3D7_0919000	PF3D7_0919000			0919000.1 0919000 nucleosome assembly protein nucleosome assembly protein Pf3D7_09_v3:781368-782675(-) 269
298	-0.242779	2.1318	2.37458	7.26243	8.46654	0	24.042	20	6	6	6	6	PF3D7_1404900	PF3D7_1404900			1404900.1 1404900 conserved Plasmodium protein, unknown function conserved Plasmodium protein, unknown function Pf3D7_14_v3:170000-170893(+) 297
297	-0.242786	0.330906	0.573692	6.72031	7.95076	0	26.153	9	4	5	4	5	PF3D7_1148700	PF3D7_1148700			1148700.1 1148700 Plasmodium exported protein (PHISTc), unknown function Plasmodium exported protein (PHISTc), unknown function Pf3D7_11_v3:1934333-1935582(-) 370
296	-0.24658	3.20381	3.45039	7.58593	8.8412	0	57.181	29	13	14	13	14	PF3D7_1017100	PF3D7_1017100			1017100.1 1017100 rhoptry neck protein 12 rhoptry neck protein 12 Pf3D7_10_v3:689888-690820(-) 310
295	-0.250298	1.97832	2.22862	7.21783	8.70918	0	67.636	33	16	15	16	15	PF3D7_1357800	PF3D7_1357800			1357800.1 1357800 T-complex protein 1 subunit delta T-complex protein 1 subunit delta Pf3D7_13_v3:2291897-2294134(+) 529
294	-0.250633	-1.40362	-1.15298	6.19981	7.98514	0	73.569	27	15	15	15	15	PF3D7_0826500	PF3D7_0826500			0826500.1 0826500 ubiquitin conjugation factor E4 B, putative ubiquitin conjugation factor E4 B, putative Pf3D7_08_v3:1152302-1156282(+) 1326
293	-0.25449	3.97062	4.22511	7.81843	9.02255	0	96.755	51	20	20	20	20	PF3D7_0621200	PF3D7_0621200			0621200.1 0621200 pyridoxine biosynthesis protein PDX1 pyridoxine biosynthesis protein PDX1 Pf3D7_06_v3:871297-872202(-) 301
292	-0.254494	-0.372736	-0.118242	6.51095	7.87267	0	22.038	5	3	3	3	3	PF3D7_1117100	PF3D7_1117100			1117100.1 1117100 deubiquinating/deneddylating enzyme deubiquinating/deneddylating enzyme Pf3D7_11_v3:652579-653976(+) 465
291	-0.258596	4.76963	5.02823	8.05983	9.87937	0	323.31	234	72	77	72	77	PF3D7_0524000	PF3D7_0524000			0524000.1 0524000 karyopherin beta karyopherin beta Pf3D7_05_v3:998753-1002124(+) 1123
290	-0.259134	0.931848	1.19098	6.90465	8.18341	0	25.662	21	11	12	11	12	PF3D7_1334200	PF3D7_1334200			1334200.1 1334200 chaperone binding protein, putative chaperone binding protein, putative Pf3D7_13_v3:1398271-1399845(+) 524
289	-0.260899	-4.00088	-3.73998	5.42012	7.19827	0.0036331	3.3012	3	1	2	1	2	PF3D7_1426700	PF3D7_1426700			1426700.1 1426700 phosphoenolpyruvate carboxylase phosphoenolpyruvate carboxylase Pf3D7_14_v3:1036137-1039583(-) 1148
288	-0.262335	0.913691	1.17603	6.89985	8.80294	0	48.678	33	16	19	16	19	PF3D7_1024800	PF3D7_1024800			1024800.1 1024800 conserved Plasmodium protein, unknown function conserved Plasmodium protein, unknown function Pf3D7_10_v3:1034685-1039079(+) 1464
287	-0.262369	-0.0347233	0.227646	6.61435	8.33035	0	62.406	45	22	23	22	23	PF3D7_1466300	PF3D7_1466300			1466300.1 1466300 26S proteasome regulatory subunit RPN2, putative 26S proteasome regulatory subunit RPN2, putative Pf3D7_14_v3:2709418-2713192(+) 1172
286	-0.264704	2.99678	3.26148	7.52742	8.98982	0	80.409	62	20	22	20	22	PF3D7_1251200	PF3D7_1251200			1251200.1 1251200 coronin coronin Pf3D7_12_v3:2092087-2094231(+) 602
285	-0.264997	-0.264881	0.000116348	6.54563	8.23583	0	51.388	38	11	14	11	14	PF3D7_1453800	PF3D7_1453800			1453800.1 1453800 glucose-6-phosphate dehydrogenase-6-phosphogluconolactonase glucose-6-phosphate dehydrogenase-6-phosphogluconolactonase Pf3D7_14_v3:2209792-2212524(-) 910
284	-0.269041	-2.09529	-1.82625	5.99547	7.25074	0	4.075	4	2	2	2	2	PF3D7_0819600	PF3D7_0819600			0819600.1 0819600 conserved Plasmodium protein, unknown function conserved Plasmodium protein, unknown function Pf3D7_08_v3:885198-886136(-) 277
283	-0.270029	3.00418	3.27421	7.53078	8.53078	0	97.449	60	11	15	11	15	PF3D7_1204300	PF3D7_1204300			1204300.1 1204300 eukaryotic translation initiation factor 5A eukaryotic translation initiation factor 5A Pf3D7_12_v3:205491-205976(-) 161
282	-0.272213	-1.64042	-1.36821	6.13306	7.93242	0.00093721	3.7741	4	1	2	1	2	PF3D7_1421100	PF3D7_1421100			1421100.1 1421100 conserved Plasmodium protein, unknown function conserved Plasmodium protein, unknown function Pf3D7_14_v3:871000-874761(+) 1253
281	-0.274033	2.00478	2.27881	7.23076	8.79896	0	66.431	34	18	18	18	18	PF3D7_1253400;PF3D7_1372400;PF3D7_1479000;PF3D7_0301000	PF3D7_1253400;PF3D7_1372400			1253400.1 1253400 acyl-CoA synthetase acyl-CoA synthetase Pf3D7_12_v3:2180419-2182869(+) 816;1372400.1 1372400 acyl-CoA synthetase acyl-CoA synthetase Pf3D7_13_v3:2850891-2853482(+) 863
280	-0.27428	-1.51674	-1.24246	6.17076	8.01586	0	34.378	27	14	14	14	14	PF3D7_1244100	PF3D7_1244100			1244100.1 1244100 N-alpha-acetyltransferase 15, NatA auxiliary subunit, putative N-alpha-acetyltransferase 15, NatA auxiliary subunit, putative Pf3D7_12_v3:1847677-1852156(+) 1296
279	-0.274588	2.70257	2.97716	7.44094	8.6714	0	110.07	45	16	16	14	14	PF3D7_0727400	PF3D7_0727400			0727400.1 0727400 proteasome subunit alpha type-5, putative proteasome subunit alpha type-5, putative Pf3D7_07_v3:1162710-1163831(+) 256
278	-0.275282	-0.963978	-0.688696	6.33736	7.29159	0	33.335	6	3	5	3	5	PF3D7_0718500	PF3D7_0718500			0718500.1 0718500 prefoldin subunit 3, putative prefoldin subunit 3, putative Pf3D7_07_v3:824445-825884(+) 192
277	-0.275898	0.179506	0.455404	6.68169	8.12885	0	17.846	13	6	7	6	7	PF3D7_0109800	PF3D7_0109800			0109800.1 0109800 phenylalanine--tRNA ligase alpha subunit phenylalanine--tRNA ligase alpha subunit Pf3D7_01_v3:380697-382424(+) 575
276	-0.278772	0.941614	1.22039	6.91173	8.63601	0	57.879	30	17	16	17	16	PF3D7_1420400	PF3D7_1420400			1420400.1 1420400 glycine--tRNA ligase glycine--tRNA ligase Pf3D7_14_v3:846508-849177(+) 889
275	-0.279036	5.69846	5.97749	8.34374	9.80614	0	212	98	32	33	32	33	PF3D7_1416500;PF3D7_1430700	PF3D7_1416500			1416500.1 1416500 NADP-specific glutamate dehydrogenase NADP-specific glutamate dehydrogenase Pf3D7_14_v3:667412-668824(+) 470
274	-0.281593	-3.02625	-2.74465	5.71789	7.92471	0	22.878	9	7	9	7	9	PF3D7_0402300	PF3D7_0402300			0402300.1 0402300 reticulocyte binding protein homologue 1 reticulocyte binding protein homologue 1 Pf3D7_04_v3:137640-146653(+) 2971
273	-0.282272	0.899403	1.18168	6.89977	8.10387	0	14.322	9	5	6	5	6	PF3D7_0406400	PF3D7_0406400			0406400.1 0406400 cytosolic glyoxalase II cytosolic glyoxalase II Pf3D7_04_v3:332043-333856(+) 263
272	-0.285747	-0.394596	-0.108849	6.51096	7.6249	0	22.091	2	2	2	2	2	PF3D7_1301400	PF3D7_1301400			1301400.1 1301400 Plasmodium exported protein (hyp12), unknown function Plasmodium exported protein (hyp12), unknown function Pf3D7_13_v3:82718-84018(+) 381
271	-0.288256	0.61031	0.898565	6.814	8.11504	0	24.888	12	9	8	9	8	PF3D7_1113700	PF3D7_1113700			1113700.1 1113700 glyoxalase I glyoxalase I Pf3D7_11_v3:529493-530563(+) 356
270	-0.289612	0.390987	0.680599	6.74827	7.97871	0	55.791	7	4	5	4	5	PF3D7_0110700	PF3D7_0110700			0110700.1 0110700 chromatin assembly factor 1 protein WD40 domain, putative chromatin assembly factor 1 protein WD40 domain, putative Pf3D7_01_v3:413760-415100(-) 446
269	-0.29221	-3.36367	-3.07146	5.61855	7.29066	0	4.1377	3	2	2	2	2	PF3D7_0919800	PF3D7_0919800			0919800.1 0919800 TLD domain-containing protein TLD domain-containing protein Pf3D7_09_v3:804417-807920(-) 1078
268	-0.292648	1.17744	1.47009	6.98565	8.56543	0	99.1	65	23	23	23	23	PF3D7_0822600	PF3D7_0822600			0822600.1 0822600 protein transport protein SEC23 protein transport protein SEC23 Pf3D7_08_v3:997055-999529(+) 759
267	-0.297772	-0.152927	0.144844	6.58626	7.94799	0	12.248	11	5	6	5	6	PF3D7_1104400	PF3D7_1104400			1104400.1 1104400 thioredoxin, putative thioredoxin, putative Pf3D7_11_v3:196767-198355(+) 424
266	-0.298014	-0.843851	-0.545837	6.37833	8.22342	0	36.819	23	10	12	10	12	PF3D7_1445100	PF3D7_1445100			1445100.1 1445100 histidine--tRNA ligase, putative histidine--tRNA ligase, putative Pf3D7_14_v3:1851656-1855054(-) 1132
265	-0.299423	4.49735	4.79678	7.98649	9.69405	0	323.31	244	60	65	58	63	PF3D7_0619400	PF3D7_0619400			0619400.1 0619400 cell division cycle protein 48 homologue, putative cell division cycle protein 48 homologue, putative Pf3D7_06_v3:815622-818247(-) 828
264	-0.313854	7.3157	7.62956	8.83796	10.2693	0	222.25	319	42	43	41	42	PF3D7_1357100;PF3D7_1357000	PF3D7_1357100;PF3D7_1357000			1357100.1 1357100 elongation factor 1-alpha elongation factor 1-alpha Pf3D7_13_v3:2268901-2270232(+) 443;1357000.1 1357000 elongation factor 1-alpha elongation factor 1-alpha Pf3D7_13_v3:2265817-2267148(-) 443
263	-0.315628	-1.08054	-0.764908	6.31082	7.3522	0	8.3508	5	2	3	2	3	PF3D7_0830600	PF3D7_0830600			0830600.1 0830600 Plasmodium exported protein (PHISTc), unknown function Plasmodium exported protein (PHISTc), unknown function Pf3D7_08_v3:1303323-1304813(+) 456
262	-0.318088	4.08028	4.39837	7.86491	9.9755	0	323.31	802	153	162	153	162	PF3D7_1361800	PF3D7_1361800			1361800.1 1361800 conserved Plasmodium protein, unknown function conserved Plasmodium protein, unknown function Pf3D7_13_v3:2473530-2481626(+) 2605
261	-0.321585	1.14395	1.46553	6.98173	8.30395	0	26.83	11	7	7	7	7	PF3D7_1359400	PF3D7_1359400			1359400.1 1359400 CUGBP Elav-like family member 1 CUGBP Elav-like family member 1 Pf3D7_13_v3:2359251-2361198(-) 509
260	-0.323715	-1.23807	-0.914354	6.2651	8.10397	0	36.022	11	5	6	5	6	PF3D7_1110400	PF3D7_1110400			1110400.1 1110400 asparagine-rich antigen asparagine-rich antigen Pf3D7_11_v3:414797-419556(+) 1483
259	-0.325392	1.98617	2.31156	7.23608	8.95208	0	116.54	64	31	33	31	33	PF3D7_1461900;H0Y4A6;B0V043;P26640;H0Y426;E7EVJ6;B4DZ61	PF3D7_1461900			1461900.1 1461900 valine--tRNA ligase, putative valine--tRNA ligase, putative Pf3D7_14_v3:2514673-2517945(+) 1090
258	-0.326798	1.98677	2.31357	7.23656	8.71368	0	72.887	66	22	24	22	24	PF3D7_0417200	PF3D7_0417200			0417200.1 0417200 bifunctional dihydrofolate reductase-thymidylate synthase bifunctional dihydrofolate reductase-thymidylate synthase Pf3D7_04_v3:748088-749914(+) 608
257	-0.329447	1.12901	1.45846	6.97891	8.155	0	61.902	28	8	8	8	8	PF3D7_0317000	PF3D7_0317000			0317000.1 0317000 proteasome subunit alpha type-3, putative proteasome subunit alpha type-3, putative Pf3D7_03_v3:682795-683685(-) 252
256	-0.335905	-8.84744	-8.51154	3.97707	6.14734	0	6.2722	3	2	3	2	3	PF3D7_0320400	PF3D7_0320400			0320400.1 0320400 oocyst capsule protein oocyst capsule protein Pf3D7_03_v3:848247-857504(-) 3085
255	-0.34404	7.22353	7.56757	8.81666	10.3481	0	323.31	361	61	69	54	62	PF3D7_0818900;H0YIE7;P11021;P38646	PF3D7_0818900			0818900.1 0818900 heat shock protein 70 heat shock protein 70 Pf3D7_08_v3:860384-862417(+) 677
254	-0.34683	1.11419	1.46102	6.97816	8.55794	0	42.976	26	12	14	12	14	PF3D7_0102900	PF3D7_0102900			0102900.1 0102900 aspartate--tRNA ligase aspartate--tRNA ligase Pf3D7_01_v3:128960-130840(-) 626
253	-0.348398	2.94179	3.29019	7.52866	8.89039	0	54.909	48	15	15	15	15	PF3D7_0722400	PF3D7_0722400			0722400.1 0722400 Obg-like ATPase 1, putative Obg-like ATPase 1, putative Pf3D7_07_v3:954784-956343(+) 393
252	-0.350817	3.20665	3.55747	7.60891	8.93113	0	118.89	47	17	18	17	18	PF3D7_0209800	PF3D7_0209800			0209800.1 0209800 ATP-dependent RNA helicase UAP56 ATP-dependent RNA helicase UAP56 Pf3D7_02_v3:404281-406355(-) 457
251	-0.351284	1.27185	1.62313	7.02657	8.90164	0	171.37	109	42	38	42	38	PF3D7_1118300	PF3D7_1118300			1118300.1 1118300 insulinase, putative insulinase, putative Pf3D7_11_v3:694655-699121(+) 1488
250	-0.35281	2.65873	3.01154	7.44439	8.22253	0	36.684	42	12	11	12	11	PF3D7_0511000	PF3D7_0511000			0511000.1 0511000 translationally-controlled tumor protein homolog translationally-controlled tumor protein homolog Pf3D7_05_v3:467585-468100(-) 171
249	-0.360003	-1.69676	-1.33676	6.13481	7.0379	0	7.0392	2	1	1	1	1	PF3D7_1126200	PF3D7_1126200			1126200.1 1126200 40S ribosomal protein S18, putative 40S ribosomal protein S18, putative Pf3D7_11_v3:1023790-1024496(-) 156
248	-0.361139	0.777163	1.1383	6.87978	8.55188	0	106.25	57	28	29	28	29	PF3D7_1349200	PF3D7_1349200			1349200.1 1349200 glutamate--tRNA ligase, putative glutamate--tRNA ligase, putative Pf3D7_13_v3:1971890-1974481(-) 863
247	-0.366766	-3.91734	-3.55057	5.4678	6.54699	0.0051238	2.7318	3	1	1	1	1	PF3D7_1414800	PF3D7_1414800			1414800.1 1414800 small nuclear ribonucleoprotein-associated protein B, putative small nuclear ribonucleoprotein-associated protein B, putative Pf3D7_14_v3:599763-600680(-) 201
246	-0.370249	-4.79201	-4.42176	5.20526	6.91282	0.005137	2.7656	2	1	1	1	1	PF3D7_1304100	PF3D7_1304100			1304100.1 1304100 DNA ligase I DNA ligase I Pf3D7_13_v3:221816-224720(-) 912
245	-0.37356	2.18844	2.562	7.30728	8.90935	0	96.788	52	24	23	24	23	PF3D7_1200700	PF3D7_1200700			1200700.1 1200700 acyl-CoA synthetase acyl-CoA synthetase Pf3D7_12_v3:61556-64336(-) 926
244	-0.377667	2.94197	3.31964	7.535	9.44348	0	323.31	211	67	66	67	66	PF3D7_0915400	PF3D7_0915400			0915400.1 0915400 6-phosphofructokinase 6-phosphofructokinase Pf3D7_09_v3:650585-654841(-) 1418
243	-0.379631	6.26141	6.64104	8.53467	9.8771	0	323.31	174	33	34	31	33	PF3D7_1246200	PF3D7_1246200			1246200.1 1246200 actin I actin I Pf3D7_12_v3:1920784-1921914(+) 376
242	-0.382591	-0.625677	-0.243086	6.4621	7.41634	0	11.38	9	4	4	4	4	PF3D7_0527100	PF3D7_0527100			0527100.1 0527100 ubiquitin-conjugating enzyme E2 N, putative ubiquitin-conjugating enzyme E2 N, putative Pf3D7_05_v3:1129959-1130754(-) 152
241	-0.38308	-0.989618	-0.606539	6.35265	7.3069	0	13.29	7	3	5	3	5	PF3D7_1128200	PF3D7_1128200			1128200.1 1128200 multiprotein-bridging factor 1, putative multiprotein-bridging factor 1, putative Pf3D7_11_v3:1097117-1097527(+) 136
240	-0.383585	4.65912	5.0427	8.05319	9.25732	0	159.04	64	18	19	18	19	PF3D7_1226300	PF3D7_1226300			1226300.1 1226300 haloacid dehalogenase-like hydrolase, putative haloacid dehalogenase-like hydrolase, putative Pf3D7_12_v3:1065796-1066683(+) 295
239	-0.384686	1.78204	2.16673	7.18735	8.74367	0	85.871	56	25	26	25	26	PF3D7_1229500	PF3D7_1229500			1229500.1 1229500 T-complex protein 1 subunit gamma T-complex protein 1 subunit gamma Pf3D7_12_v3:1211788-1213563(+) 542
238	-0.388182	-6.70831	-6.32013	4.08293	5.73614	0	4.5448	2	2	0	2	0	PF3D7_0408600	PF3D7_0408600			0408600.1 0408600 sporozoite invasion-associated protein 1 sporozoite invasion-associated protein 1 Pf3D7_04_v3:413403-416357(+) 984
237	-0.388966	2.64746	3.03642	7.44878	8.59491	0	55.798	39	14	13	14	13	PF3D7_1474800	PF3D7_1474800			1474800.1 1474800 proteasome subunit alpha type-1, putative proteasome subunit alpha type-1, putative Pf3D7_14_v3:3067562-3068692(+) 254
236	-0.391258	-0.219185	0.172073	6.58634	7.92876	0	20.887	10	4	5	4	5	PF3D7_0916700	PF3D7_0916700			0916700.1 0916700 RNA-binding protein musashi, putative RNA-binding protein musashi, putative Pf3D7_09_v3:696863-698029(-) 388
235	-0.393028	1.14791	1.54094	6.99826	8.3962	0	25.682	18	7	10	7	10	PF3D7_1226900	PF3D7_1226900			1226900.1 1226900 conserved Plasmodium protein, unknown function conserved Plasmodium protein, unknown function Pf3D7_12_v3:1088536-1090023(-) 495
234	-0.394236	1.99229	2.38652	7.25271	8.61443	0	18.274	11	7	7	7	7	PF3D7_0813400	PF3D7_0813400			0813400.1 0813400 conserved Plasmodium protein, unknown function conserved Plasmodium protein, unknown function Pf3D7_08_v3:658493-662095(-) 659
233	-0.39702	2.4709	2.86792	7.39738	8.90254	0	66.111	61	21	26	21	26	PF3D7_0922600	PF3D7_0922600			0922600.1 0922600 glutamine synthetase, putative glutamine synthetase, putative Pf3D7_09_v3:916603-918674(+) 543
232	-0.408613	4.63179	5.0404	8.05038	9.71315	0	323.31	220	49	54	49	54	PF3D7_0708800;REV__Q15149-7;REV__Q15149-8;REV__Q15149-9;REV__Q15149-5;REV__Q15149-4;REV__Q15149-6;REV__Q15149-3;REV__Q15149-2;REV__Q15149	PF3D7_0708800			0708800.1 0708800 heat shock protein 110 heat shock protein 110 Pf3D7_07_v3:395711-398332(+) 873
231	-0.41161	5.03448	5.44609	8.17225	9.40269	0	179.35	121	31	27	31	27	PF3D7_1120100	PF3D7_1120100			1120100.1 1120100 phosphoglycerate mutase, putative phosphoglycerate mutase, putative Pf3D7_11_v3:761695-762818(+) 250
230	-0.413166	0.786707	1.19987	6.89389	8.19493	0	26.8	18	9	9	9	9	PF3D7_0810300	PF3D7_0810300			0810300.1 0810300 protein phosphatase PPM5, putative protein phosphatase PPM5, putative Pf3D7_08_v3:525058-527604(-) 550
229	-0.417559	3.08915	3.5067	7.58796	9.11942	0	84.894	57	24	25	24	25	PF3D7_1434300	PF3D7_1434300			1434300.1 1434300 Hsp70/Hsp90 organizing protein Hsp70/Hsp90 organizing protein Pf3D7_14_v3:1372903-1374597(+) 564
228	-0.425209	4.95465	5.37986	8.15119	9.10544	0	112.23	60	13	15	13	15	PF3D7_0932200	PF3D7_0932200			0932200.1 0932200 profilin, putative profilin, putative Pf3D7_09_v3:1287008-1288372(+) 171
227	-0.428783	-5.59076	-5.16198	4.97748	6.53378	0	3.9987	1	1	1	1	1	PF3D7_0717400	PF3D7_0717400			0717400.1 0717400 queuine tRNA-ribosyltransferase, putative queuine tRNA-ribosyltransferase, putative Pf3D7_07_v3:751877-754132(+) 751
226	-0.429584	2.36387	2.79346	7.37223	8.41363	0	33.159	36	10	10	8	8	PF3D7_1020900;F5H1V1;F5H6T5;F8WCJ5;F8WDB3	PF3D7_1020900			1020900.1 1020900 ADP-ribosylation factor ADP-ribosylation factor Pf3D7_10_v3:845086-846192(-) 181
225	-0.435061	6.12677	6.56183	8.50617	9.8072	0	249.04	222	33	33	33	33	PF3D7_0520900	PF3D7_0520900			0520900.1 0520900 adenosylhomocysteinase adenosylhomocysteinase Pf3D7_05_v3:857038-858477(+) 479
224	-0.436857	-1.76474	-1.32788	6.13098	7.4734	0	73.474	6	2	4	2	4	PF3D7_1336800	PF3D7_1336800			1336800.1 1336800 nuclear movement protein, putative nuclear movement protein, putative Pf3D7_13_v3:1486456-1487616(+) 386
223	-0.438582	3.08633	3.52491	7.59168	8.87043	0	39.661	36	17	18	17	18	PF3D7_1428300	PF3D7_1428300			1428300.1 1428300 proliferation-associated protein 2g4, putative proliferation-associated protein 2g4, putative Pf3D7_14_v3:1105200-1106514(-) 377
222	-0.441139	0.454086	0.895226	6.79985	8.03032	0	10.835	9	5	5	5	5	PF3D7_1132300	PF3D7_1132300			1132300.1 1132300 nucleic acid binding protein, putative nucleic acid binding protein, putative Pf3D7_11_v3:1253073-1253894(+) 273
221	-0.441301	-3.18046	-2.73916	5.70577	6.81971	0	7.2749	6	2	2	2	2	PF3D7_1324700	PF3D7_1324700			1324700.1 1324700 SNARE protein, putative SNARE protein, putative Pf3D7_13_v3:1034900-1035637(+) 221
220	-0.444517	2.39262	2.83713	7.38416	8.3384	0	12.594	14	4	5	4	5	PF3D7_1453700	PF3D7_1453700			1453700.1 1453700 co-chaperone p23 co-chaperone p23 Pf3D7_14_v3:2207027-2208320(+) 275
219	-0.444626	-3.10939	-2.66476	5.7279	6.7693	0	5.2821	6	2	2	2	2	PF3D7_0301800	PF3D7_0301800			0301800.1 0301800 Plasmodium exported protein, unknown function Plasmodium exported protein, unknown function Pf3D7_03_v3:104325-105281(+) 257
218	-0.445028	-2.79824	-2.35321	5.82165	7.35313	0	9.8748	9	3	5	3	5	PF3D7_0920700	PF3D7_0920700			0920700.1 0920700 conserved Plasmodium protein, unknown function conserved Plasmodium protein, unknown function Pf3D7_09_v3:849515-851296(+) 593
217	-0.4453	-4.94521	-4.49991	5.17542	7.01427	0	4.9788	2	2	2	2	2	PF3D7_1036900	PF3D7_1036900			1036900.1 1036900 conserved Plasmodium protein, unknown function conserved Plasmodium protein, unknown function Pf3D7_10_v3:1452599-1458006(-) 1681
216	-0.450966	-0.0627842	0.388182	6.6464	7.94743	0	16.485	10	5	6	5	6	PF3D7_0306200	PF3D7_0306200			0306200.1 0306200 activator of Hsp90 ATPase activator of Hsp90 ATPase Pf3D7_03_v3:292943-294548(+) 349
215	-0.453699	1.03263	1.48633	6.97675	8.66695	0	122.65	78	28	28	28	28	PF3D7_1436600	PF3D7_1436600			1436600.1 1436600 cGMP-dependent protein kinase cGMP-dependent protein kinase Pf3D7_14_v3:1490654-1494214(-) 853
214	-0.455288	-3.38876	-2.93348	5.64613	7.12326	0	13.247	2	1	1	1	1	PF3D7_1206700	PF3D7_1206700			1206700.1 1206700 eukaryotic translation initiation factor 5, putative eukaryotic translation initiation factor 5, putative Pf3D7_12_v3:301129-302826(-) 565
213	-0.455412	-4.96505	-4.50964	5.17167	6.6768	0.00094251	3.8974	4	3	3	3	3	PF3D7_1340600	PF3D7_1340600			1340600.1 1340600 RNA lariat debranching enzyme, putative RNA lariat debranching enzyme, putative Pf3D7_13_v3:1618001-1619728(-) 575
212	-0.461544	3.88418	4.34573	7.83687	9.13789	0	54.122	57	18	20	18	20	PF3D7_0934800;B1APF6;B1APF7;B1APG1;B1APG0;Q15136;B1APG2;B1APF8;B1APF9;K7ERP6;B1APG3;C9JK39;P22694-8;B1APG4;P22694-4;P22694-3;P17612-2;P22694;P17612;P22694-5;P22694-7;P22694-6;P22694-9;P22694-2	PF3D7_0934800			0934800.1 0934800 cAMP-dependent protein kinase catalytic subunit cAMP-dependent protein kinase catalytic subunit Pf3D7_09_v3:1361935-1363848(+) 342
211	-0.462233	9.17014	9.63237	9.42825	10.7707	0	323.31	594	44	47	44	47	PF3D7_1462800	PF3D7_1462800			1462800.1 1462800 glyceraldehyde-3-phosphate dehydrogenase glyceraldehyde-3-phosphate dehydrogenase Pf3D7_14_v3:2559098-2560347(+) 337
210	-0.463924	4.22792	4.69184	7.94087	9.087	0	86.659	54	15	17	15	17	PF3D7_0826700	PF3D7_0826700			0826700.1 0826700 receptor for activated c kinase receptor for activated c kinase Pf3D7_08_v3:1160164-1161708(-) 323
209	-0.466381	1.04218	1.50856	6.98241	8.44481	0	43.849	20	7	9	7	9	PF3D7_1366900	PF3D7_1366900			1366900.1 1366900 conserved Plasmodium protein, unknown function conserved Plasmodium protein, unknown function Pf3D7_13_v3:2675590-2677966(+) 685
208	-0.466389	-0.0463295	0.420059	6.65473	7.49982	0	23.202	6	3	3	3	3	PF3D7_0828900	PF3D7_0828900			0828900.1 0828900 conserved Plasmodium protein, unknown function conserved Plasmodium protein, unknown function Pf3D7_08_v3:1241966-1242895(-) 185
207	-0.468441	2.48665	2.95509	7.41769	9.15008	0	291.34	117	44	45	44	45	PF3D7_1225800	PF3D7_1225800			1225800.1 1225800 ubiquitin-activating enzyme E1 ubiquitin-activating enzyme E1 Pf3D7_12_v3:1045995-1049831(+) 1140
206	-0.46998	5.43388	5.90386	8.30522	9.94868	0	323.31	400	63	64	63	64	PF3D7_1451100;P13639	PF3D7_1451100			1451100.1 1451100 elongation factor 2 elongation factor 2 Pf3D7_14_v3:2090902-2093400(+) 832
205	-0.471521	-2.96062	-2.4891	5.77858	6.68167	0	6.3604	3	2	2	2	2	PF3D7_1358800	PF3D7_1358800			1358800.1 1358800 40S ribosomal protein S15 40S ribosomal protein S15 Pf3D7_13_v3:2331074-2331529(+) 151
204	-0.474087	-1.05109	-0.577005	6.35395	7.3082	0	16.486	8	5	6	5	6	PF3D7_0517000	PF3D7_0517000			0517000.1 0517000 60S ribosomal protein L12, putative 60S ribosomal protein L12, putative Pf3D7_05_v3:715765-716675(-) 165
203	-0.476772	1.03274	1.50951	6.98184	8.63505	0	77.697	41	19	22	19	22	PF3D7_1213800	PF3D7_1213800			1213800.1 1213800 proline--tRNA ligase proline--tRNA ligase Pf3D7_12_v3:590194-592434(-) 746
202	-0.477049	-0.956924	-0.479876	6.38295	7.58708	0	6.42	4	2	2	2	2	PF3D7_1105400	PF3D7_1105400			1105400.1 1105400 40S ribosomal protein S4, putative 40S ribosomal protein S4, putative Pf3D7_11_v3:235597-237097(-) 261
201	-0.484095	-1.79979	-1.3157	6.13078	7.67485	0	18.275	6	3	4	3	4	PF3D7_1445900	PF3D7_1445900			1445900.1 1445900 ATP-dependent RNA helicase DDX5, putative ATP-dependent RNA helicase DDX5, putative Pf3D7_14_v3:1885443-1888323(+) 527
200	-0.484762	5.31825	5.80301	8.27367	9.38762	0	117.91	167	26	25	26	25	PF3D7_1012400	PF3D7_1012400			1012400.1 1012400 hypoxanthine-guanine phosphoribosyltransferase hypoxanthine-guanine phosphoribosyltransferase Pf3D7_10_v3:475327-476563(-) 231
199	-0.485741	6.87633	7.36207	8.74291	10.1901	0	323.31	469	52	51	52	51	PF3D7_0626800	PF3D7_0626800			0626800.1 0626800 pyruvate kinase pyruvate kinase Pf3D7_06_v3:1078995-1081320(+) 511
198	-0.486344	-6.59279	-6.10645	4.68843	6.62795	0	12.375	10	3	8	3	8	PF3D7_0407800	PF3D7_0407800			0407800.1 0407800 conserved Plasmodium protein, unknown function conserved Plasmodium protein, unknown function Pf3D7_04_v3:384924-390806(+) 1960
197	-0.487928	-0.737555	-0.249626	6.45139	7.77361	0	8.339	5	2	3	2	3	PF3D7_1412500	PF3D7_1412500			1412500.1 1412500 actin II actin II Pf3D7_14_v3:507360-508868(+) 376
196	-0.489038	-3.43363	-2.94459	5.64003	6.48514	0	4.9212	3	1	2	1	2	PF3D7_1431700	PF3D7_1431700			1431700.1 1431700 60S ribosomal protein L14, putative 60S ribosomal protein L14, putative Pf3D7_14_v3:1247030-1247950(+) 165
195	-0.49033	2.72079	3.21112	7.49297	9.02444	0	145.74	45	18	19	18	19	PF3D7_0717700	PF3D7_0717700			0717700.1 0717700 serine--tRNA ligase, putative serine--tRNA ligase, putative Pf3D7_07_v3:764794-766413(-) 539
194	-0.494242	2.69324	3.18748	7.48555	9.04187	0	159	48	22	24	19	21	PF3D7_1311900	PF3D7_1311900			1311900.1 1311900 V-type proton ATPase catalytic subunit A V-type proton ATPase catalytic subunit A Pf3D7_13_v3:507900-509735(+) 611
193	-0.494329	1.34892	1.84325	7.08088	8.58604	0	96.477	43	18	21	17	20	PF3D7_0320300	PF3D7_0320300			0320300.1 0320300 T-complex protein 1 subunit epsilon T-complex protein 1 subunit epsilon Pf3D7_03_v3:845713-847320(+) 535
192	-0.497891	-1.97212	-1.47423	6.08196	7.61343	0	8.4776	4	1	3	1	3	PF3D7_1353000	PF3D7_1353000			1353000.1 1353000 tryptophan-rich protein, pseudogene tryptophan-rich protein, pseudogene Pf3D7_13_v3:2118361-2120913(-) 801
191	-0.499552	-1.08701	-0.58746	6.34875	7.71047	0	12.371	6	4	5	4	5	PF3D7_0206700	PF3D7_0206700			0206700.1 0206700 adenylosuccinate lyase adenylosuccinate lyase Pf3D7_02_v3:271594-273009(+) 471
190	-0.499838	0.672133	1.17197	6.87837	8.75343	0	104.06	82	34	34	34	34	PF3D7_0622800	PF3D7_0622800			0622800.1 0622800 leucine--tRNA ligase, putative leucine--tRNA ligase, putative Pf3D7_06_v3:919685-924028(+) 1447
189	-0.500507	0.42543	0.925938	6.80425	8.52026	0	119.43	70	29	29	29	29	PF3D7_0817700	PF3D7_0817700			0817700.1 0817700 rhoptry neck protein 5 rhoptry neck protein 5 Pf3D7_08_v3:805797-813465(-) 1156
188	-0.500519	0.202274	0.702793	6.73708	7.69132	0	23.032	14	9	4	9	4	PF3D7_0934500	PF3D7_0934500			0934500.1 0934500 V-type proton ATPase subunit E, putative V-type proton ATPase subunit E, putative Pf3D7_09_v3:1350836-1351929(-) 235
187	-0.503479	1.29786	1.80134	7.06755	8.48252	0	56.631	43	15	16	15	16	PF3D7_1125800	PF3D7_1125800			1125800.1 1125800 kelch domain-containing protein, putative kelch domain-containing protein, putative Pf3D7_11_v3:1008409-1010853(-) 592
186	-0.505316	-1.46061	-0.95529	6.23754	7.75607	0	10.543	5	4	4	4	4	PF3D7_1007900	PF3D7_1007900			1007900.1 1007900 eukaryotic translation initiation factor 3 subunit D, putative eukaryotic translation initiation factor 3 subunit D, putative Pf3D7_10_v3:316649-318280(+) 543
185	-0.509869	0.00159645	0.511465	6.67874	8.35083	0	47.219	22	10	10	9	9	PF3D7_1222300	PF3D7_1222300			1222300.1 1222300 endoplasmin, putative endoplasmin, putative Pf3D7_12_v3:883567-886032(-) 821
184	-0.511219	-4.61278	-4.10157	5.15606	6.82815	0	4.0604	1	0	1	0	1	PF3D7_0630600	PF3D7_0630600			0630600.1 0630600 conserved protein, unknown function conserved protein, unknown function Pf3D7_06_v3:1279820-1283246(+) 935
183	-0.511627	-0.252607	0.25902	6.6026	7.644	0	5.9242	6	3	2	3	2	PF3D7_0936600	PF3D7_0936600			0936600.1 0936600 gametocyte exported protein 5 gametocyte exported protein 5 Pf3D7_09_v3:1446929-1447947(+) 297
182	-0.518122	1.79179	2.30991	7.21945	8.12254	0	26.941	20	6	7	6	7	PF3D7_1127100	PF3D7_1127100			1127100.1 1127100 deoxyuridine 5-triphosphate nucleotidohydrolase deoxyuridine 5-triphosphate nucleotidohydrolase Pf3D7_11_v3:1060262-1060783(-) 173
181	-0.520775	2.10886	2.62963	7.31549	8.83401	0	72.148	56	21	24	21	24	PF3D7_1218600	PF3D7_1218600			1218600.1 1218600 arginine--tRNA ligase arginine--tRNA ligase Pf3D7_12_v3:732174-734959(-) 590
180	-0.529976	3.709	4.23898	7.79923	9.19717	0	142.78	67	23	27	23	27	PF3D7_1242800	PF3D7_1242800			1242800.1 1242800 rab specific GDP dissociation inhibitor rab specific GDP dissociation inhibitor Pf3D7_12_v3:1805380-1807356(-) 459
179	-0.531248	-3.41625	-2.885	5.6546	6.76854	0	8.1477	6	3	4	3	4	PF3D7_1320600;J3KQP6;H3BMH2;H3BSC1;PF3D7_1340700;B4DT13;P62491;Q15907	PF3D7_1320600			1320600.1 1320600 ras-related protein Rab-11A ras-related protein Rab-11A Pf3D7_13_v3:847090-848383(+) 216
178	-0.53161	1.68229	2.2139	7.18949	8.63665	0	56.737	30	17	18	17	18	PF3D7_1457300	PF3D7_1457300			1457300.1 1457300 conserved Plasmodium protein, unknown function conserved Plasmodium protein, unknown function Pf3D7_14_v3:2346178-2348097(-) 639
177	-0.533604	3.09916	3.63276	7.61645	9.30666	0	261.69	175	46	48	46	48	PF3D7_1034900	PF3D7_1034900			1034900.1 1034900 methionine--tRNA ligase methionine--tRNA ligase Pf3D7_10_v3:1383450-1386119(+) 889
176	-0.53533	1.9606	2.49593	7.27409	8.47821	0	18.916	18	7	8	7	8	PF3D7_0618500	PF3D7_0618500			0618500.1 0618500 malate dehydrogenase malate dehydrogenase Pf3D7_06_v3:774529-775470(+) 313
175	-0.536818	-2.33016	-1.79334	5.98278	7.44518	0	11.073	7	2	3	2	3	PF3D7_1149600	PF3D7_1149600			1149600.1 1149600 DnaJ protein, putative DnaJ protein, putative Pf3D7_11_v3:2001068-2003313(+) 714
174	-0.540675	-4.52943	-3.98876	5.32158	7.04587	0	4.9708	1	1	1	1	1	PF3D7_0822900	PF3D7_0822900			0822900.1 0822900 conserved Plasmodium protein, unknown function conserved Plasmodium protein, unknown function Pf3D7_08_v3:1007777-1011307(-) 1176
173	-0.542797	1.37543	1.91823	7.09961	8.33005	0	71.304	23	8	10	6	7	PF3D7_1414400	PF3D7_1414400			1414400.1 1414400 serine/threonine protein phosphatase PP1 serine/threonine protein phosphatase PP1 Pf3D7_14_v3:575496-577055(+) 304
172	-0.548181	-0.821722	-0.273541	6.4394	7.91652	0	13.611	7	6	6	6	6	PF3D7_0629100	PF3D7_0629100			0629100.1 0629100 nicotinate phosphoribosyltransferase, putative nicotinate phosphoribosyltransferase, putative Pf3D7_06_v3:1196041-1198038(-) 665
171	-0.552612	3.36017	3.91278	7.69927	9.11424	0	264.5	81	31	30	30	29	PF3D7_1419800;PF3D7_1419800.2	PF3D7_1419800;PF3D7_1419800.2			1419800.1 1419800 glutathione reductase glutathione reductase Pf3D7_14_v3:822423-824202(-) 500;1419800.2 1419800 glutathione reductase glutathione reductase Pf3D7_14_v3:822423-824340(-) 546
170	-0.558279	2.79757	3.35585	7.53116	9.06262	0	67.175	40	15	18	15	18	PF3D7_0610800	PF3D7_0610800			0610800.1 0610800 transketolase transketolase Pf3D7_06_v3:453671-455689(+) 672
169	-0.559668	-3.87463	-3.31496	5.52294	7.02808	0	10.515	3	1	2	1	2	PF3D7_1441400	PF3D7_1441400			1441400.1 1441400 FACT complex subunit SSRP1, putative FACT complex subunit SSRP1, putative Pf3D7_14_v3:1690993-1692513(+) 506
168	-0.560821	2.79244	3.35327	7.53019	8.92813	0	81.586	45	18	20	17	19	PF3D7_0406100;C9JL73;P15313	PF3D7_0406100			0406100.1 0406100 V-type proton ATPase subunit B V-type proton ATPase subunit B Pf3D7_04_v3:323267-325225(-) 494
167	-0.565214	1.11698	1.68219	7.02678	8.81213	0	99.631	38	21	22	20	21	PF3D7_1126000;B7ZLP8;A2RTX5-2;A2RTX5	PF3D7_1126000			1126000.1 1126000 threonine--tRNA ligase threonine--tRNA ligase Pf3D7_11_v3:1014334-1017375(-) 1013
166	-0.571129	-0.332453	0.238676	6.59181	8.28201	0	43.393	21	9	13	9	13	PF3D7_1331700	PF3D7_1331700			1331700.1 1331700 glutamine--tRNA ligase, putative glutamine--tRNA ligase, putative Pf3D7_13_v3:1319089-1321845(-) 918
165	-0.574669	-4.29333	-3.71866	5.40024	6.40024	0.0090909	2.4442	1	1	1	1	1	PF3D7_0721600	PF3D7_0721600			0721600.1 0721600 40S ribosomal protein S5, putative 40S ribosomal protein S5, putative Pf3D7_07_v3:931459-932164(-) 195
164	-0.580152	1.67845	2.2586	7.19915	8.70431	0	49.263	36	14	19	14	19	PF3D7_1012600	PF3D7_1012600			1012600.1 1012600 GMP synthase [glutamine-hydrolyzing] GMP synthase [glutamine-hydrolyzing] Pf3D7_10_v3:482527-484194(-) 555
163	-0.580526	-2.99329	-2.41276	5.79291	6.696	0	11.646	3	2	2	2	2	PF3D7_0520600	PF3D7_0520600			0520600.1 0520600 bis(5-nucleosyl)-tetraphosphatase [asymmetrical] bis(5-nucleosyl)-tetraphosphatase [asymmetrical] Pf3D7_05_v3:843586-844817(-) 152
162	-0.583977	5.55583	6.1398	8.36723	9.66826	0	165.29	124	27	31	25	29	PF3D7_1008700	PF3D7_1008700			1008700.1 1008700 tubulin beta chain tubulin beta chain Pf3D7_10_v3:360625-362480(-) 445
161	-0.585163	-0.697685	-0.112522	6.485	8.01649	0	13.237	11	4	5	4	5	PF3D7_0811400	PF3D7_0811400			0811400.1 0811400 conserved protein, unknown function conserved protein, unknown function Pf3D7_08_v3:575986-578370(+) 608
160	-0.592121	3.51954	4.11166	7.75607	8.93216	0	66.328	58	17	16	17	16	PF3D7_1033400	PF3D7_1033400			1033400.1 1033400 haloacid dehalogenase-like hydrolase haloacid dehalogenase-like hydrolase Pf3D7_10_v3:1339762-1340628(+) 288
159	-0.592247	0.91617	1.50842	6.9724	8.43479	0	41.242	21	8	10	6	8	PF3D7_1311500	PF3D7_1311500			1311500.1 1311500 26S protease regulatory subunit 7, putative 26S protease regulatory subunit 7, putative Pf3D7_13_v3:489927-491609(-) 420
158	-0.592256	-4.50332	-3.91106	5.34098	6.6834	0	6.5066	2	1	1	1	1	PF3D7_1434100	PF3D7_1434100			1434100.1 1434100 queuine tRNA-ribosyltransferase, putative queuine tRNA-ribosyltransferase, putative Pf3D7_14_v3:1366979-1368202(+) 407
157	-0.597231	-1.66092	-1.06369	6.19775	7.10082	0	6.8373	5	3	4	3	4	PF3D7_1116200.2;PF3D7_1116200	PF3D7_1116200.2;PF3D7_1116200			1116200.2 1116200 pyridoxine biosynthesis protein PDX2 pyridoxine biosynthesis protein PDX2 Pf3D7_11_v3:615744-617186(-) 181;1116200.1 1116200 pyridoxine biosynthesis protein PDX2 pyridoxine biosynthesis protein PDX2 Pf3D7_11_v3:615744-617186(-)
156	-0.597994	0.574783	1.17278	6.87092	7.98486	0	36.084	10	4	5	4	5	PF3D7_1236100	PF3D7_1236100			1236100.1 1236100 clustered-asparagine-rich protein clustered-asparagine-rich protein Pf3D7_12_v3:1506932-1508269(-) 445
155	-0.598248	0.761984	1.36023	6.92733	8.44585	0	41.902	20	15	16	15	16	PF3D7_1224300	PF3D7_1224300			1224300.1 1224300 polyadenylate-binding protein, putative polyadenylate-binding protein, putative Pf3D7_12_v3:988628-991255(+) 875
154	-0.610491	1.97789	2.58838	7.29609	8.63852	0	32.273	35	14	14	14	14	PF3D7_1410600	PF3D7_1410600			1410600.1 1410600 eukaryotic translation initiation factor 2 subunit gamma, putative eukaryotic translation initiation factor 2 subunit gamma, putative Pf3D7_14_v3:427191-428588(+) 465
153	-0.615332	-3.34259	-2.72726	5.69558	6.92603	0	20.033	2	1	1	1	1	PF3D7_1015000	PF3D7_1015000			1015000.1 1015000 FAD synthetase, putative FAD synthetase, putative Pf3D7_10_v3:611213-612199(+) 328
152	-0.618216	3.11687	3.73509	7.64071	9.29394	0	173.46	105	34	40	34	40	PF3D7_1342600	PF3D7_1342600			1342600.1 1342600 myosin A myosin A Pf3D7_13_v3:1673699-1676539(+) 818
151	-0.620081	-1.24713	-0.62705	6.32744	7.83259	0	67.398	10	5	5	5	5	PF3D7_1368200;D6R9I9;P61221	PF3D7_1368200			1368200.1 1368200 ABC transporter E family member 1, putative ABC transporter E family member 1, putative Pf3D7_13_v3:2713463-2715436(-) 619
150	-0.623386	-0.906675	-0.283289	6.43067	8.0839	0	49.56	31	13	14	13	14	PF3D7_1459000	PF3D7_1459000			1459000.1 1459000 ATP-dependent RNA helicase DBP5 ATP-dependent RNA helicase DBP5 Pf3D7_14_v3:2420764-2422989(+) 741
149	-0.627199	3.01959	3.64679	7.61346	8.51655	0	22.827	20	6	8	6	8	PF3D7_0702400	PF3D7_0702400			0702400.1 0702400 small exported membrane protein 1 small exported membrane protein 1 Pf3D7_07_v3:101694-102285(+) 123
148	-0.64658	-1.64576	-0.99918	6.21344	7.35955	0	22.917	10	6	7	6	7	PF3D7_1465900	PF3D7_1465900			1465900.1 1465900 40S ribosomal protein S3 40S ribosomal protein S3 Pf3D7_14_v3:2684141-2685534(+) 221
147	-0.647322	-2.90373	-2.25641	5.83492	7.35344	0.0035461	3.091	2	2	2	2	2	PF3D7_0217500	PF3D7_0217500			0217500.1 0217500 calcium-dependent protein kinase 1 calcium-dependent protein kinase 1 Pf3D7_02_v3:720437-722661(+) 524
146	-0.648066	-6.10253	-5.45447	4.7488	6.29288	0.0036664	3.4803	2	0	1	0	1	PF3D7_0304200	PF3D7_0304200			0304200.1 0304200 EH domain-containing protein EH domain-containing protein Pf3D7_03_v3:207342-208919(-) 525
145	-0.651842	2.05189	2.70373	7.32773	8.75909	0	75.812	40	18	18	18	18	PF3D7_0308200	PF3D7_0308200			0308200.1 0308200 T-complex protein 1 subunit eta T-complex protein 1 subunit eta Pf3D7_03_v3:362342-364233(-) 539
144	-0.653656	-4.21957	-3.56592	5.44025	6.44025	0.0098522	2.3598	2	2	2	2	2	PF3D7_1323100	PF3D7_1323100			1323100.1 1323100 60S ribosomal protein L6, putative 60S ribosomal protein L6, putative Pf3D7_13_v3:965486-966280(-) 190
143	-0.660179	-3.30752	-2.64735	5.71628	7.14765	0	8.2016	3	2	2	2	2	PF3D7_0212300	PF3D7_0212300			0212300.1 0212300 peptide chain release factor subunit 1, putative peptide chain release factor subunit 1, putative Pf3D7_02_v3:492616-494306(+) 427
142	-0.663826	1.33177	1.99559	7.11368	8.54503	0	91.741	43	14	17	14	17	PF3D7_1361100	PF3D7_1361100			1361100.1 1361100 protein transport protein Sec24A protein transport protein Sec24A Pf3D7_13_v3:2450461-2453760(+) 940
141	-0.666245	0.932148	1.59839	6.99393	8.44108	0	23.769	13	3	4	3	4	PF3D7_1149100.2;PF3D7_1149100	PF3D7_1149100.2;PF3D7_1149100			1149100.2 1149100 Plasmodium exported protein, unknown function Plasmodium exported protein, unknown function Pf3D7_11_v3:1972400-1973874(+) 449;1149100.1 1149100 Plasmodium exported protein, unknown function Plasmodium exported protein, unknown fu
140	-0.667246	1.15765	1.8249	7.06206	8.86138	0	84.833	81	35	36	35	36	PF3D7_0706000	PF3D7_0706000			0706000.1 0706000 importin-7, putative importin-7, putative Pf3D7_07_v3:293400-297089(+) 1229
139	-0.674206	1.13956	1.81376	7.05816	8.45611	0	30.72	15	9	10	9	10	PF3D7_0920800	PF3D7_0920800			0920800.1 0920800 inosine-5-monophosphate dehydrogenase inosine-5-monophosphate dehydrogenase Pf3D7_09_v3:852525-854057(-) 510
138	-0.679501	1.83626	2.51576	7.26909	8.11421	0	35.73	24	7	7	7	7	PF3D7_0319600	PF3D7_0319600			0319600.1 0319600 elongation factor 1 (EF-1), putative elongation factor 1 (EF-1), putative Pf3D7_03_v3:817913-818695(+) 156
137	-0.681063	0.655876	1.33694	6.91413	8.31207	0	54.084	19	10	11	10	11	PF3D7_0932300	PF3D7_0932300			0932300.1 0932300 M18 aspartyl aminopeptidase M18 aspartyl aminopeptidase Pf3D7_09_v3:1289315-1291027(-) 570
136	-0.68433	1.34744	2.03177	7.12303	8.65452	0	41.991	30	13	15	13	15	PF3D7_0214000	PF3D7_0214000			0214000.1 0214000 T-complex protein 1 subunit theta T-complex protein 1 subunit theta Pf3D7_02_v3:566121-567894(+) 542
135	-0.686741	-7.44808	-6.76133	4.4759	6.05568	0	4.3545	2	1	2	1	2	PF3D7_1022600	PF3D7_1022600			1022600.1 1022600 kelch domain-containing protein, putative kelch domain-containing protein, putative Pf3D7_10_v3:948477-951152(+) 891
134	-0.686781	-1.11656	-0.429781	6.38187	7.7436	0	9.465	8	3	5	3	5	PF3D7_0919400	PF3D7_0919400			0919400.1 0919400 protein disulfide isomerase protein disulfide isomerase Pf3D7_09_v3:795539-797470(+) 515
133	-0.686905	2.26219	2.94909	7.39902	8.89038	0	106.47	104	24	32	24	32	PF3D7_0525100	PF3D7_0525100			0525100.1 0525100 acyl-CoA synthetase acyl-CoA synthetase Pf3D7_05_v3:1041745-1043766(+) 673
132	-0.69087	-1.63641	-0.945539	6.22632	8.07759	0	8.8201	6	2	2	2	2	PF3D7_0711000	PF3D7_0711000			0711000.1 0711000 AAA family ATPase, CDC48 subfamily AAA family ATPase, CDC48 subfamily Pf3D7_07_v3:487281-490970(-) 1229
131	-0.691013	-4.93639	-4.24538	5.23295	6.27434	0.0036199	3.2808	2	1	1	1	1	PF3D7_1116300	PF3D7_1116300			1116300.1 1116300 peptidyl-prolyl cis-trans isomerase peptidyl-prolyl cis-trans isomerase Pf3D7_11_v3:618312-619778(+) 167
130	-0.691223	0.191235	0.882458	6.77658	8.54743	0	46.047	30	16	20	16	20	PF3D7_1423300	PF3D7_1423300			1423300.1 1423300 serine/threonine protein phosphatase 7 serine/threonine protein phosphatase 7 Pf3D7_14_v3:936168-941638(+) 959
129	-0.696207	-0.0199699	0.676237	6.71414	8.25821	0	23.471	22	11	10	11	10	PF3D7_1402300	PF3D7_1402300			1402300.1 1402300 26S proteasome regulatory subunit RPN6 26S proteasome regulatory subunit RPN6 Pf3D7_14_v3:85883-87883(-) 666
128	-0.702334	-2.17309	-1.47076	6.06737	6.66945	0.0034692	2.8734	2	1	1	1	1	PF3D7_0721800	PF3D7_0721800			0721800.1 0721800 conserved Plasmodium protein, unknown function conserved Plasmodium protein, unknown function Pf3D7_07_v3:938279-938895(+) 106
127	-0.710735	-2.52751	-1.81677	5.96262	7.40976	0	4.9789	3	2	3	2	3	PF3D7_1237400	PF3D7_1237400			1237400.1 1237400 conserved Plasmodium protein, unknown function conserved Plasmodium protein, unknown function Pf3D7_12_v3:1558909-1560623(+) 438
126	-0.712747	-5.93235	-5.2196	NaN	NaN	0	94.698	1	0	1	0	1	PF3D7_1334500	PF3D7_1334500			1334500.1 1334500 MSP7-like protein MSP7-like protein Pf3D7_13_v3:1405731-1407512(-) 593
125	-0.726391	0.666758	1.39315	6.92777	8.22881	0	18.579	7	3	4	3	4	PF3D7_1115800	PF3D7_1115800			1115800.1 1115800 conserved Plasmodium protein, unknown function conserved Plasmodium protein, unknown function Pf3D7_11_v3:596289-597203(-) 304
124	-0.728737	1.56953	2.29827	7.20006	8.74413	0	222.48	54	18	20	18	20	PF3D7_1238800	PF3D7_1238800			1238800.1 1238800 acyl-CoA synthetase acyl-CoA synthetase Pf3D7_12_v3:1610363-1612741(+) 792
123	-0.73613	-1.06357	-0.32744	6.40912	7.48831	0	4.6135	5	1	2	1	2	PF3D7_0815600	PF3D7_0815600			0815600.1 0815600 eukaryotic translation initiation factor 3 subunit G, putative eukaryotic translation initiation factor 3 subunit G, putative Pf3D7_08_v3:729917-732187(-) 268
122	-0.761246	0.00466728	0.765913	6.73649	7.99176	0	10.108	7	4	4	4	4	PF3D7_1108400;E7EU96;P68400-2;P68400	PF3D7_1108400			1108400.1 1108400 casein kinase 2, alpha subunit casein kinase 2, alpha subunit Pf3D7_11_v3:365093-366100(+) 335
121	-0.764746	-1.48576	-0.721018	6.28863	7.40257	0	12.545	3	2	1	2	1	PF3D7_0312300	PF3D7_0312300			0312300.1 0312300 26S proteasome regulatory subunit RPN12, putative 26S proteasome regulatory subunit RPN12, putative Pf3D7_03_v3:521969-522883(+) 304
120	-0.766743	-4.94813	-4.18139	5.24682	6.70922	0.0036036	3.244	1	1	1	1	1	PF3D7_1324800	PF3D7_1324800			1324800.1 1324800 dihydrofolate synthase/folylpolyglutamate synthase dihydrofolate synthase/folylpolyglutamate synthase Pf3D7_13_v3:1036543-1038531(-) 522
119	-0.768875	-0.852263	-0.0833874	6.48029	7.80251	0	6.9393	6	2	4	2	4	PF3D7_1306400	PF3D7_1306400			1306400.1 1306400 26S protease regulatory subunit 10B, putative 26S protease regulatory subunit 10B, putative Pf3D7_13_v3:297178-298359(-) 393
118	-0.769705	-0.387138	0.382566	6.6205	7.6205	0	37.181	18	6	8	6	8	PF3D7_1366500	PF3D7_1366500			1366500.1 1366500 nucleoside diphosphate kinase nucleoside diphosphate kinase Pf3D7_13_v3:2661573-2662022(+) 149
117	-0.772728	-2.9479	-2.17517	5.85033	7.61376	0	15.813	10	5	5	5	5	PF3D7_1011800	PF3D7_1011800			1011800.1 1011800 PRE-binding protein PRE-binding protein Pf3D7_10_v3:455398-458817(+) 1139
116	-0.783909	-6.48656	-5.70265	4.78769	5.9918	0.00093023	3.7024	3	1	2	1	2	PF3D7_0901800	PF3D7_0901800			0901800.1 0901800 Plasmodium exported protein, unknown function Plasmodium exported protein, unknown function Pf3D7_09_v3:84624-85610(+) 269
115	-0.791153	4.99377	5.78493	8.24529	9.42139	0	113.42	139	23	26	21	24	PF3D7_1117700	PF3D7_1117700			1117700.1 1117700 GTP-binding nuclear protein RAN/TC4 GTP-binding nuclear protein RAN/TC4 Pf3D7_11_v3:670711-671515(-) 214
114	-0.800013	-1.38474	-0.584728	6.32722	7.47334	0	17.286	9	5	3	5	3	PF3D7_1017400	PF3D7_1017400			1017400.1 1017400 phosphomannomutase, putative phosphomannomutase, putative Pf3D7_10_v3:697970-699823(-) 244
113	-0.81045	-2.33004	-1.51959	6.04509	6.82323	0	13.375	6	2	2	2	2	PF3D7_1143400	PF3D7_1143400			1143400.1 1143400 translation initiation factor eIF-1A, putative translation initiation factor eIF-1A, putative Pf3D7_11_v3:1735126-1736572(+) 155
112	-0.822733	0.161072	0.983805	6.79784	8.43132	0	97.302	33	13	15	13	15	PF3D7_0815200	PF3D7_0815200			0815200.1 0815200 importin beta, putative importin beta, putative Pf3D7_08_v3:717113-719746(+) 877
111	-0.828813	-4.70396	-3.87515	5.22422	6.90547	0	4.4355	2	0	2	0	2	PF3D7_1001400	PF3D7_1001400			1001400.1 1001400 alpha/beta hydrolase, putative alpha/beta hydrolase, putative Pf3D7_10_v3:74661-77572(-) 921
110	-0.835684	-1.47201	-0.636322	6.30927	7.15436	0.0018553	3.6492	2	1	1	1	1	PF3D7_0719600	PF3D7_0719600			0719600.1 0719600 60S ribosomal protein L11a, putative 60S ribosomal protein L11a, putative Pf3D7_07_v3:858742-859492(-) 173
109	-0.83884	0.501555	1.3404	6.9041	8.22632	0	35.824	15	6	10	6	10	PF3D7_1017900	PF3D7_1017900			1017900.1 1017900 26S proteasome regulatory subunit p55, putative 26S proteasome regulatory subunit p55, putative Pf3D7_10_v3:715878-717437(+) 467
108	-0.839268	4.71178	5.55105	8.17158	9.28553	0	101.51	111	24	24	24	24	PF3D7_1439900	PF3D7_1439900			1439900.1 1439900 triosephosphate isomerase triosephosphate isomerase Pf3D7_14_v3:1622576-1623612(+) 248
107	-0.853712	1.42607	2.27978	7.18588	8.26505	0	34.203	25	11	12	11	12	PF3D7_1302100	PF3D7_1302100			1302100.1 1302100 gamete antigen 27/25 gamete antigen 27/25 Pf3D7_13_v3:121636-122289(-) 217
106	-0.85679	-5.86855	-5.01176	4.88207	6.22448	0.0075503	2.5787	1	1	1	1	1	PF3D7_1464700	PF3D7_1464700			1464700.1 1464700 ATP synthase (C/AC39) subunit, putative ATP synthase (C/AC39) subunit, putative Pf3D7_14_v3:2625452-2626600(-) 382
105	-0.866724	-2.50385	-1.63712	6.00591	7.30694	0	15.553	9	5	3	5	3	PF3D7_0507100	PF3D7_0507100			0507100.1 0507100 60S ribosomal protein L4 60S ribosomal protein L4 Pf3D7_05_v3:294668-295903(-) 411
104	-0.870979	-3.53965	-2.66867	5.6951	7.30788	0.0009434	3.9064	1	1	1	1	1	PF3D7_1206200	PF3D7_1206200			1206200.1 1206200 eukaryotic translation initiation factor 3 subunit C, putative eukaryotic translation initiation factor 3 subunit C, putative Pf3D7_12_v3:275744-279336(-) 984
103	-0.876828	-5.68299	-4.80616	4.94396	5.84705	0.0043066	2.8097	1	0	1	0	1	PF3D7_0528700	PF3D7_0528700			0528700.1 0528700 peptidyl-prolyl cis-trans isomerase peptidyl-prolyl cis-trans isomerase Pf3D7_05_v3:1178276-1178890(-) 204
102	-0.879332	-0.653089	0.226242	6.566	7.52025	0	28.393	10	4	5	4	5	PF3D7_0422400	PF3D7_0422400			0422400.1 0422400 40S ribosomal protein S19 40S ribosomal protein S19 Pf3D7_04_v3:1026648-1027399(+) 170
101	-0.886492	0.124525	1.01102	6.80178	8.12401	0	36.875	16	7	9	7	9	PF3D7_0111500	PF3D7_0111500			0111500.1 0111500 UMP-CMP kinase, putative UMP-CMP kinase, putative Pf3D7_01_v3:439652-441418(-) 371
100	-0.892172	-2.1736	-1.28143	6.1113	6.88945	0	24.398	7	4	4	4	4	PF3D7_0516200;H0YB22;E5RH77;P62263	PF3D7_0516200			0516200.1 0516200 40S ribosomal protein S11 40S ribosomal protein S11 Pf3D7_05_v3:675809-676614(-) 151
99	-0.894392	0.910177	1.80457	7.04013	8.55866	0	33.872	23	9	13	9	13	PF3D7_1015200.3;PF3D7_1015200.2;PF3D7_1015200	PF3D7_1015200.3;PF3D7_1015200.2;PF3D7_1015200			1015200.3 1015200 cysteine--tRNA ligase, putative cysteine--tRNA ligase, putative Pf3D7_10_v3:614872-616796(-) 593;1015200.2 1015200 cysteine--tRNA ligase, putative cysteine--tRNA ligase, putative Pf3D7_10_v3:614872-617736(-) 676;1015200.1 1015
98	-0.902227	-0.128674	0.773554	6.72927	7.93339	0	16.436	5	4	6	4	6	PF3D7_0527500	PF3D7_0527500			0527500.1 0527500 Hsc70-interacting protein Hsc70-interacting protein Pf3D7_05_v3:1143618-1145359(+) 458
97	-0.906164	-0.0940742	0.81209	6.74062	8.20301	0	26.032	19	8	10	6	8	PF3D7_1130400	PF3D7_1130400			1130400.1 1130400 26S protease regulatory subunit 6A, putative 26S protease regulatory subunit 6A, putative Pf3D7_11_v3:1168879-1170198(+) 439
96	-0.922995	0.187836	1.11083	6.82946	7.97558	0	12.52	7	4	4	4	4	PF3D7_1008900	PF3D7_1008900			1008900.1 1008900 adenylate kinase adenylate kinase Pf3D7_10_v3:369199-370225(-) 242
95	-0.923523	-0.379261	0.544262	6.65887	7.35784	0	54.818	7	2	2	2	2	PF3D7_1037700	PF3D7_1037700			1037700.1 1037700 enhancer of rudimentary homolog, putative enhancer of rudimentary homolog, putative Pf3D7_10_v3:1495973-1496658(+) 105
94	-0.924168	0.518126	1.44229	6.92916	8.40628	0	51.486	38	14	17	14	17	PF3D7_0608700	PF3D7_0608700			0608700.1 0608700 T-complex protein 1 subunit zeta T-complex protein 1 subunit zeta Pf3D7_06_v3:358391-360203(+) 543
93	-0.927267	-6.25503	-5.32776	4.78694	6.56509	0	5.2548	3	0	3	0	3	PF3D7_1423700	PF3D7_1423700			1423700.1 1423700 conserved Plasmodium protein, unknown function conserved Plasmodium protein, unknown function Pf3D7_14_v3:959074-963750(-) 1558
92	-0.927753	0.617535	1.54529	6.95994	8.16406	0	74.057	25	12	12	12	12	PF3D7_1357900	PF3D7_1357900			1357900.1 1357900 pyrroline-5-carboxylate reductase pyrroline-5-carboxylate reductase Pf3D7_13_v3:2295637-2297156(+) 262
91	-0.955433	-1.26546	-0.310024	6.39967	7.7219	0	6.6699	6	3	2	3	2	PF3D7_1035100	PF3D7_1035100			1035100.1 1035100 probable protein, unknown function probable protein, unknown function Pf3D7_10_v3:1391445-1393130(+) 561
90	-0.965272	-5.06644	-4.10116	5.2578	6.80188	0	7.2619	2	1	2	1	2	PF3D7_1409600	PF3D7_1409600			1409600.1 1409600 conserved Plasmodium protein, unknown function conserved Plasmodium protein, unknown function Pf3D7_14_v3:374800-377106(+) 768
89	-0.967934	0.672562	1.6405	6.98605	8.44844	0	44.823	30	14	17	14	17	PF3D7_0904800	PF3D7_0904800			0904800.1 0904800 replication protein A1, small fragment replication protein A1, small fragment Pf3D7_09_v3:222271-224156(+) 484
88	-0.97716	-5.36131	-4.38415	5.071	5.76998	0.0036101	3.2563	2	0	1	0	1	PF3D7_1019400	PF3D7_1019400			1019400.1 1019400 60S ribosomal protein L30e, putative 60S ribosomal protein L30e, putative Pf3D7_10_v3:786503-787008(+) 108
87	-0.988373	-2.21826	-1.22988	6.12071	7.29677	0	7.5451	7	2	2	2	2	PF3D7_1321900	PF3D7_1321900			1321900.1 1321900 conserved Plasmodium protein, unknown function conserved Plasmodium protein, unknown function Pf3D7_13_v3:911667-912545(-) 292
86	-0.996481	-2.48733	-1.49085	6.04163	6.99589	0	9.8895	8	4	5	4	5	PF3D7_1416900	PF3D7_1416900			1416900.1 1416900 prefoldin subunit 2, putative prefoldin subunit 2, putative Pf3D7_14_v3:685437-686368(-) 147
85	-0.998764	-3.2392	-2.24044	5.81586	6.71894	0	4.4504	3	1	2	1	2	PF3D7_1112400	PF3D7_1112400			1112400.1 1112400 conserved Plasmodium protein, unknown function conserved Plasmodium protein, unknown function Pf3D7_11_v3:475880-476455(+) 191
84	-0.999806	1.50204	2.50184	7.24336	8.35731	0	50.155	44	7	9	7	9	PF3D7_1353900	PF3D7_1353900			1353900.1 1353900 proteasome subunit alpha type-7, putative proteasome subunit alpha type-7, putative Pf3D7_13_v3:2154162-2155217(+) 241
83	-1.0029	-2.82086	-1.81795	5.94278	7.26501	0	5.2298	3	1	1	1	1	PF3D7_0904000	PF3D7_0904000			0904000.1 0904000 GTPase-activating protein, putative GTPase-activating protein, putative Pf3D7_09_v3:187342-188622(-) 426
82	-1.01001	-2.32444	-1.31442	6.09391	7.20788	0	29.117	6	4	3	4	3	PF3D7_1244600	PF3D7_1244600			1244600.1 1244600 ADP-ribosylation factor GTPase-activating protein, putative ADP-ribosylation factor GTPase-activating protein, putative Pf3D7_12_v3:1868533-1869531(-) 332
81	-1.07147	-1.00313	0.0683479	6.50648	7.20545	0.00093633	3.7647	5	1	2	1	2	PF3D7_1203900	PF3D7_1203900			1203900.1 1203900 ubiquitin-conjugating enzyme E2 ubiquitin-conjugating enzyme E2 Pf3D7_12_v3:194144-195462(+) 147
80	-1.07329	-3.38008	-2.30678	5.79138	6.79138	0	5.735	1	1	1	1	1	PF3D7_1351400	PF3D7_1351400			1351400.1 1351400 60S ribosomal protein L17, putative 60S ribosomal protein L17, putative Pf3D7_13_v3:2052108-2053384(+) 203
79	-1.0857	-4.13967	-3.05396	5.56573	7.07089	0	9.7369	7	5	6	5	6	PF3D7_1206800	PF3D7_1206800			1206800.1 1206800 conserved Plasmodium protein, unknown function conserved Plasmodium protein, unknown function Pf3D7_12_v3:308214-310397(+) 727
78	-1.08933	-0.921692	0.167641	6.53532	8.12639	0	27.13	15	8	10	8	10	PF3D7_0810800	PF3D7_0810800			0810800.1 0810800 hydroxymethyldihydropterin pyrophosphokinase-dihydropteroate synthase hydroxymethyldihydropterin pyrophosphokinase-dihydropteroate synthase Pf3D7_08_v3:548200-550616(+) 706
77	-1.09588	-0.849119	0.246759	6.55874	8.34408	0	71.989	27	10	15	10	15	PF3D7_0214100	PF3D7_0214100			0214100.1 0214100 protein transport protein SEC31 protein transport protein SEC31 Pf3D7_02_v3:568529-573315(-) 1471
76	-1.11149	-0.799669	0.311825	6.57742	8.17949	0	46.712	18	9	12	9	12	PF3D7_0413900	PF3D7_0413900			0413900.1 0413900 ubiquitin carboxyl-terminal hydrolase 13, putative ubiquitin carboxyl-terminal hydrolase 13, putative Pf3D7_04_v3:623168-626226(-) 853
75	-1.1152	0.155249	1.27045	6.86578	8.29715	0	25.281	15	6	10	6	10	PF3D7_1338100	PF3D7_1338100			1338100.1 1338100 26S proteasome regulatory subunit RPN3, putative 26S proteasome regulatory subunit RPN3, putative Pf3D7_13_v3:1542080-1543981(+) 503
74	-1.13715	-6.17263	-5.03548	4.87493	5.65308	0.0090984	2.4476	1	0	1	0	1	PF3D7_1421200	PF3D7_1421200			1421200.1 1421200 40S ribosomal protein S25 40S ribosomal protein S25 Pf3D7_14_v3:875687-876385(-) 105
73	-1.14474	-0.740065	0.404674	6.60347	7.74959	0	31.426	12	5	4	5	4	PF3D7_1333400	PF3D7_1333400			1333400.1 1333400 conserved protein, unknown function conserved protein, unknown function Pf3D7_13_v3:1370083-1370799(+) 238
72	-1.14549	1.21716	2.36265	7.19285	8.272	0	33.074	24	8	10	8	10	PF3D7_1353800	PF3D7_1353800			1353800.1 1353800 proteasome subunit alpha type-4, putative proteasome subunit alpha type-4, putative Pf3D7_13_v3:2151402-2152373(-) 246
71	-1.15811	-3.04871	-1.8906	5.91176	7.08785	0.0035273	3.008	2	1	2	1	2	PF3D7_0319900	PF3D7_0319900			0319900.1 0319900 conserved Plasmodium protein, unknown function conserved Plasmodium protein, unknown function Pf3D7_03_v3:833833-834777(-) 314
70	-1.19318	-4.17598	-2.98281	5.58102	6.6602	0	29.914	5	2	2	2	2	PF3D7_1459700	PF3D7_1459700			1459700.1 1459700 pyridoxal 5-phosphate synthase, putative pyridoxal 5-phosphate synthase, putative Pf3D7_14_v3:2444473-2446179(-) 287
69	-1.20975	-4.25072	-3.04097	5.56259	6.76671	0	6.1363	3	1	2	1	2	PF3D7_1458400	PF3D7_1458400			1458400.1 1458400 aminodeoxychorismate lyase aminodeoxychorismate lyase Pf3D7_14_v3:2397919-2398869(-) 316
68	-1.21973	-4.75771	-3.53798	5.32572	6.62674	0	4.3883	2	1	1	1	1	PF3D7_1405600	PF3D7_1405600			1405600.1 1405600 ribonucleoside-diphosphate reductase small chain, putative ribonucleoside-diphosphate reductase small chain, putative Pf3D7_14_v3:193216-194265(-) 349
67	-1.22427	-1.90007	-0.675798	6.27379	8.09985	0	41.085	32	16	15	16	15	PF3D7_0619500	PF3D7_0619500			0619500.1 0619500 acyl-CoA synthetase acyl-CoA synthetase Pf3D7_06_v3:820069-824247(-) 1392
66	-1.2307	0.885094	2.11579	7.11381	8.57621	0	57.263	42	12	16	12	16	PF3D7_0923800.2;PF3D7_0923800	PF3D7_0923800.2;PF3D7_0923800			0923800.2 0923800 thioredoxin reductase thioredoxin reductase Pf3D7_09_v3:961933-963558(-) 541;0923800.1 0923800 thioredoxin reductase thioredoxin reductase Pf3D7_09_v3:961933-963786(-) 617
65	-1.24058	1.34663	2.58721	7.25518	8.59761	0	39.618	25	10	12	9	11	PF3D7_1468700	PF3D7_1468700			1468700.1 1468700 eukaryotic initiation factor 4A eukaryotic initiation factor 4A Pf3D7_14_v3:2825370-2826918(+) 398
64	-1.24934	-2.90535	-1.65601	5.97737	7.05656	0	9.9535	7	3	4	3	4	PF3D7_0814200	PF3D7_0814200			0814200.1 0814200 DNA/RNA-binding protein Alba 1 DNA/RNA-binding protein Alba 1 Pf3D7_08_v3:687340-688086(+) 248
63	-1.2727	-2.99674	-1.72404	5.95564	7.18608	0	6.6556	5	2	3	2	3	PF3D7_0410600	PF3D7_0410600			0410600.1 0410600 conserved Plasmodium protein, unknown function conserved Plasmodium protein, unknown function Pf3D7_04_v3:479028-480468(+) 326
62	-1.28037	-5.60511	-4.32475	5.17237	6.63476	0	7.5101	3	2	2	2	2	PF3D7_1402000	PF3D7_1402000			1402000.1 1402000 conserved Plasmodium protein, unknown function conserved Plasmodium protein, unknown function Pf3D7_14_v3:77258-80423(-) 498
61	-1.3304	-2.8982	-1.56779	5.99968	7.3007	0	5.6148	3	1	2	1	2	PF3D7_1118400	PF3D7_1118400			1118400.1 1118400 haloacid dehalogenase-like hydrolase, putative haloacid dehalogenase-like hydrolase, putative Pf3D7_11_v3:699869-700789(-) 306
60	-1.34619	-0.484695	0.861492	6.73017	7.96061	0	12.995	10	5	6	5	6	PF3D7_1368100	PF3D7_1368100			1368100.1 1368100 26S proteasome regulatory subunit RPN11, putative 26S proteasome regulatory subunit RPN11, putative Pf3D7_13_v3:2710406-2711718(-) 311
59	-1.35368	-7.13301	-5.77933	4.7307	6.81349	0	9.2413	5	3	4	3	4	PF3D7_0613900	PF3D7_0613900			0613900.1 0613900 myosin E, putative myosin E, putative Pf3D7_06_v3:579435-585896(-) 2153
58	-1.36825	-0.911943	0.456303	6.60708	7.83753	0	15.434	9	3	7	3	7	PF3D7_1130200	PF3D7_1130200			1130200.1 1130200 60S ribosomal protein P0 60S ribosomal protein P0 Pf3D7_11_v3:1165221-1166171(+) 316
57	-1.38757	-5.66365	-4.27608	5.18153	6.76132	0.00093197	3.7218	2	1	2	1	2	PF3D7_0301600	PF3D7_0301600			0301600.1 0301600 Plasmodium exported protein (hyp1), unknown function Plasmodium exported protein (hyp1), unknown function Pf3D7_03_v3:91115-93463(-) 732
56	-1.41873	-3.23436	-1.81564	5.92067	7.24289	0	9.9802	8	3	4	3	4	PF3D7_1230700	PF3D7_1230700			1230700.1 1230700 protein transport protein SEC13 protein transport protein SEC13 Pf3D7_12_v3:1259620-1262088(+) 822
55	-1.42623	0.222246	1.64847	6.9631	8.07704	0	14.514	10	4	5	4	5	PF3D7_0512700	PF3D7_0512700			0512700.1 0512700 orotate phosphoribosyltransferase orotate phosphoribosyltransferase Pf3D7_05_v3:546734-547579(-) 281
54	-1.43451	-6.48677	-5.05226	4.86988	5.71497	0.0036765	3.5194	2	1	1	1	1	PF3D7_0505900	PF3D7_0505900			0505900.1 0505900 conserved Plasmodium protein, unknown function conserved Plasmodium protein, unknown function Pf3D7_05_v3:254473-255517(-) 126
53	-1.44196	-2.39919	-0.957226	6.17797	7.73426	0	10.261	5	4	3	4	3	PF3D7_1336900	PF3D7_1336900			1336900.1 1336900 tryptophan--tRNA ligase tryptophan--tRNA ligase Pf3D7_13_v3:1488061-1490262(-) 632
52	-1.47646	-3.52646	-2.05	5.84736	7.67344	0	12.893	11	6	6	6	6	PF3D7_0802000	PF3D7_0802000			0802000.1 0802000 glutamate dehydrogenase, putative glutamate dehydrogenase, putative Pf3D7_08_v3:146089-150282(+) 1397
51	-1.47665	-3.07988	-1.60324	5.98184	7.15794	0	5.5056	4	2	2	2	2	PF3D7_0919700	PF3D7_0919700			0919700.1 0919700 pyridoxal 5-phosphate dependent enzyme class III, putative pyridoxal 5-phosphate dependent enzyme class III, putative Pf3D7_09_v3:803029-803757(+) 242
50	-1.48475	-1.192	0.292746	6.55221	7.98356	0	27.511	10	4	8	2	6	PF3D7_1248900	PF3D7_1248900			1248900.1 1248900 26S protease regulatory subunit 8, putative 26S protease regulatory subunit 8, putative Pf3D7_12_v3:2002723-2004030(-) 435
49	-1.48634	-5.95254	-4.4662	5.11955	6.75302	0	4.7518	3	1	2	1	2	PF3D7_0907600	PF3D7_0907600			0907600.1 0907600 translation initiation factor SUI1, putative translation initiation factor SUI1, putative Pf3D7_09_v3:360535-363215(+) 818
48	-1.53435	-2.86551	-1.33117	6.06108	7.47605	0	56.927	5	3	4	3	4	PF3D7_0201800	PF3D7_0201800			0201800.1 0201800 knob associated heat shock protein 40 knob associated heat shock protein 40 Pf3D7_02_v3:86832-88791(-) 421
47	-1.62926	-5.46853	-3.83927	5.30185	6.14696	0.0076271	2.6379	2	1	1	1	1	PF3D7_1142500	PF3D7_1142500			1142500.1 1142500 60S ribosomal protein L28 60S ribosomal protein L28 Pf3D7_11_v3:1705696-1706573(-) 127
46	-1.65711	-1.89735	-0.24024	6.3841	7.72652	0	8.1852	5	2	4	2	4	PF3D7_0813200	PF3D7_0813200			0813200.1 0813200 CS domain protein, putative CS domain protein, putative Pf3D7_08_v3:651417-652804(-) 313
45	-1.66611	-2.51254	-0.846426	6.20123	7.40536	0	7.2941	4	3	3	3	3	PF3D7_1313700	PF3D7_1313700			1313700.1 1313700 septum formation protein MAF homologue, putative septum formation protein MAF homologue, putative Pf3D7_13_v3:587015-587809(-) 264
44	-1.69602	-1.62315	0.0728722	6.47673	7.85694	0	20.628	11	5	9	5	9	PF3D7_1412800	PF3D7_1412800			1412800.1 1412800 glycylpeptide N-tetradecanoyltransferase glycylpeptide N-tetradecanoyltransferase Pf3D7_14_v3:516574-518193(-) 410
43	-1.73684	-3.78876	-2.05192	5.83544	6.83544	0	6.7668	4	2	4	2	4	PF3D7_1302800	PF3D7_1302800			1302800.1 1302800 40S ribosomal protein S7, putative 40S ribosomal protein S7, putative Pf3D7_13_v3:150783-151635(-) 194
42	-1.74983	-1.10357	0.646261	6.64715	7.85127	0	7.592	6	3	4	3	4	PF3D7_0912900	PF3D7_0912900			0912900.1 0912900 26S proteasome regulatory subunit RPN8, putative 26S proteasome regulatory subunit RPN8, putative Pf3D7_09_v3:567283-568640(+) 338
41	-1.78614	-4.80231	-3.01617	5.54321	6.5846	0	8.1553	3	1	2	1	2	PF3D7_1406700	PF3D7_1406700			1406700.1 1406700 vacuolar protein sorting-associated protein 29 vacuolar protein sorting-associated protein 29 Pf3D7_14_v3:244908-245492(+) 194
40	-1.8959	-2.54956	-0.653662	6.25025	7.25025	0	5.7353	2	1	2	1	2	PF3D7_1342000	PF3D7_1342000			1342000.1 1342000 40S ribosomal protein S6 40S ribosomal protein S6 Pf3D7_13_v3:1653211-1654131(-) 306
39	-1.92665	-1.96747	-0.0408211	6.43361	7.21176	0	6.3603	4	1	2	1	2	PF3D7_0936000	PF3D7_0936000			0936000.1 0936000 ring-exported protein 2 ring-exported protein 2 Pf3D7_09_v3:1427642-1428022(-) 94
38	-1.98914	-1.32904	0.660103	6.64242	7.24448	0	16.516	7	2	5	2	5	PF3D7_0915100	PF3D7_0915100			0915100.1 0915100 SUMO-conjugating enzyme UBC9 SUMO-conjugating enzyme UBC9 Pf3D7_09_v3:643232-644043(-) 159
37	-2.02558	-4.20235	-2.17677	5.78718	7.29234	0	22.215	6	1	4	1	4	PF3D7_1342800	PF3D7_1342800			1342800.1 1342800 phosphoenolpyruvate carboxykinase phosphoenolpyruvate carboxykinase Pf3D7_13_v3:1679693-1681444(+) 583
36	-2.06906	-6.1659	-4.09684	5.15749	6.1989	0	14.171	1	0	1	0	1	PF3D7_0511600	PF3D7_0511600			0511600.1 0511600 apical rhoptry neck protein apical rhoptry neck protein Pf3D7_05_v3:517259-517885(-) 208
35	-2.07256	-2.79136	-0.718796	6.22451	7.40061	0.0098441	2.3549	3	1	1	1	1	PF3D7_0322900	PF3D7_0322900			0322900.1 0322900 40S ribosomal protein S3A, putative 40S ribosomal protein S3A, putative Pf3D7_03_v3:965553-966502(-) 262
34	-2.17565	-5.09303	-2.91739	5.55939	7.39824	0	10.87	6	2	3	2	3	PF3D7_0516700	PF3D7_0516700			0516700.1 0516700 ubiquitin carboxyl-terminal hydrolase 2, putative ubiquitin carboxyl-terminal hydrolase 2, putative Pf3D7_05_v3:694492-698778(+) 1332
33	-2.18728	-6.37219	-4.18491	5.13098	6.89442	0	4.3247	1	0	1	0	1	PF3D7_0108700	PF3D7_0108700			0108700.1 0108700 secreted ookinete protein, putative secreted ookinete protein, putative Pf3D7_01_v3:352314-356211(-) 1152
32	-2.27567	-4.57932	-2.30365	5.74116	7.29745	0	6.6602	4	1	4	1	4	PF3D7_0720400	PF3D7_0720400			0720400.1 0720400 ferrodoxin reductase-like protein ferrodoxin reductase-like protein Pf3D7_07_v3:882936-884988(+) 642
31	-2.3353	-2.41832	-0.0830154	6.40795	7.6867	0	11.42	7	3	4	3	4	PF3D7_1437900	PF3D7_1437900			1437900.1 1437900 HSP40, subfamily A, putative HSP40, subfamily A, putative Pf3D7_14_v3:1533329-1534947(+) 424
30	-2.37059	-4.38183	-2.01124	5.82652	6.72961	0	7.3945	6	1	2	1	2	PF3D7_1341200	PF3D7_1341200			1341200.1 1341200 60S ribosomal protein L18, putative 60S ribosomal protein L18, putative Pf3D7_13_v3:1633860-1634530(-) 184
29	-2.47008	-6.57871	-4.10863	5.15394	6.756	0.0035778	3.1344	1	0	1	0	1	PF3D7_0512200	PF3D7_0512200			0512200.1 0512200 glutathione synthetase glutathione synthetase Pf3D7_05_v3:529934-531901(-) 655
28	-2.50192	-1.30837	1.19355	6.78783	7.82922	0	10.79	4	1	3	1	3	PF3D7_0703700	PF3D7_0703700			0703700.1 0703700 conserved Plasmodium protein, unknown function conserved Plasmodium protein, unknown function Pf3D7_07_v3:146645-147394(-) 249
27	-2.50768	-6.68631	-4.17862	5.1705	7.02177	0	4.3101	4	2	2	2	2	PF3D7_1320000	PF3D7_1320000			1320000.1 1320000 golgi protein 1 golgi protein 1 Pf3D7_13_v3:829534-833310(+) 1258
26	-2.59226	-3.32844	-0.736185	6.20472	6.9037	0.0035524	3.1043	2	1	1	1	1	PF3D7_1441100	PF3D7_1441100			1441100.1 1441100 conserved Plasmodium protein, unknown function conserved Plasmodium protein, unknown function Pf3D7_14_v3:1673386-1674069(-) 227
25	-2.71711	-6.75186	-4.03475	5.17618	6.83892	0.003653	3.3682	1	0	1	0	1	PF3D7_1410200	PF3D7_1410200			1410200.1 1410200 cytidine triphosphate synthetase cytidine triphosphate synthetase Pf3D7_14_v3:400418-402994(+) 858
24	-2.75765	-2.99084	-0.233189	6.35241	7.35241	0	7.7945	6	2	2	2	2	PF3D7_0307200	PF3D7_0307200			0307200.1 0307200 60S ribosomal protein L7, putative 60S ribosomal protein L7, putative Pf3D7_03_v3:314976-316236(-) 257
23	-2.76389	-7.3971	-4.63322	4.99602	5.77417	0.0043103	2.8115	1	0	1	0	1	PF3D7_1126900	PF3D7_1126900			1126900.1 1126900 small nuclear ribonucleoprotein F, putative small nuclear ribonucleoprotein F, putative Pf3D7_11_v3:1053642-1054333(-) 86
22	-2.92936	-5.62242	-2.69305	5.60846	7.45972	0	9.4247	4	1	4	1	4	PF3D7_1344300	PF3D7_1344300			1344300.1 1344300 zinc finger protein, putative zinc finger protein, putative Pf3D7_13_v3:1774275-1779042(-) 1426
21	-3.03378	-6.65392	-3.62014	5.32746	7.1848	0	4.0134	2	2	1	2	1	PF3D7_0937600;PF3D7_0600400;PF3D7_0100300	PF3D7_0937600;PF3D7_0600400;PF3D7_0100300			0937600.1 0937600 erythrocyte membrane protein 1, PfEMP1 erythrocyte membrane protein 1, PfEMP1 Pf3D7_09_v3:1486070-1490187(+) 1315;0600400.1 0600400 erythrocyte membrane protein 1, PfEMP1 erythrocyte membrane protein 1, PfEMP1 Pf3D7_06_v3:18586-2
20	-3.05025	-3.53357	-0.483316	6.27145	7.31285	0	4.6084	2	1	2	1	2	PF3D7_0923900	PF3D7_0923900			0923900.1 0923900 RNA-binding protein, putative RNA-binding protein, putative Pf3D7_09_v3:966795-968069(-) 202
19	-3.12114	-7.32679	-4.20565	5.14968	6.72947	0.0090535	2.4039	2	1	1	1	1	PF3D7_0215300	PF3D7_0215300			0215300.1 0215300 acyl-CoA synthetase acyl-CoA synthetase Pf3D7_02_v3:628642-631308(-) 888
18	-3.21566	-6.05603	-2.84036	5.53572	6.1378	0.0034874	2.9153	1	0	1	0	1	PF3D7_0306900	PF3D7_0306900			0306900.1 0306900 40S ribosomal protein S23, putative 40S ribosomal protein S23, putative Pf3D7_03_v3:310652-311805(+) 145
17	-3.21948	-6.27062	-3.05114	5.49563	7.25907	0	5.2071	3	1	3	1	3	PF3D7_0704200	PF3D7_0704200			0704200.1 0704200 tRNA m5C-methyltransferase, putative tRNA m5C-methyltransferase, putative Pf3D7_07_v3:191309-194890(-) 1193
16	-3.36611	-8.17114	-4.80503	4.96546	6.58871	0.00094162	3.8923	3	2	2	2	2	PF3D7_1344100	PF3D7_1344100			1344100.1 1344100 krox-like protein, putative krox-like protein, putative Pf3D7_13_v3:1764190-1766607(+) 805
15	-3.64921	-7.26547	-3.61626	5.30216	7.10833	0.00093371	3.7388	2	0	2	0	2	PF3D7_1350500	PF3D7_1350500			1350500.1 1350500 conserved Plasmodium protein, unknown function conserved Plasmodium protein, unknown function Pf3D7_13_v3:2015367-2018801(-) 1144
14	-3.74145	-8.32826	-4.58681	3.59528	5.29425	0.0075567	2.5822	1	1	0	1	0	PF3D7_1455500	PF3D7_1455500			1455500.1 1455500 AP-1 complex subunit gamma, putative AP-1 complex subunit gamma, putative Pf3D7_14_v3:2267201-2270851(+) 1081
13	-3.74685	-5.88718	-2.14033	5.74646	6.22357	0.0035939	3.1991	1	0	1	0	1	PF3D7_1461300	PF3D7_1461300			1461300.1 1461300 40S ribosomal protein S28e, putative 40S ribosomal protein S28e, putative Pf3D7_14_v3:2492166-2492369(+) 67
12	-3.92484	-4.78696	-0.862124	6.14572	7.1871	0	4.299	3	2	2	2	2	PF3D7_0935600	PF3D7_0935600			0935600.1 0935600 gametocytogenesis-implicated protein gametocytogenesis-implicated protein Pf3D7_09_v3:1405192-1407022(+) 512
11	-4.04173	-4.72119	-0.679459	6.18622	7.36231	0.00094073	3.8744	2	0	1	0	1	PF3D7_1447000	PF3D7_1447000			1447000.1 1447000 40S ribosomal protein S5 40S ribosomal protein S5 Pf3D7_14_v3:1929931-1931379(+) 272
10	-4.17025	-6.28042	-2.11018	5.76777	6.84696	0.0042918	2.7804	1	1	1	1	1	PF3D7_0321400	PF3D7_0321400			0321400.1 0321400 protein kinase, putative protein kinase, putative Pf3D7_03_v3:894761-896112(+) 319
9	-4.17706	-6.1804	-2.00334	5.79988	7.27699	0	6.6262	4	2	3	2	3	PF3D7_0209400	PF3D7_0209400			0209400.1 0209400 conserved protein, unknown function conserved protein, unknown function Pf3D7_02_v3:388424-390611(-) 450
8	-4.25522	-7.0739	-2.81868	5.54225	6.49649	0.0090834	2.4383	1	0	1	0	1	PF3D7_0511700	PF3D7_0511700			0511700.1 0511700 EKC/KEOPS complex subunit CGI121 EKC/KEOPS complex subunit CGI121 Pf3D7_05_v3:519129-520078(+) 179
7	-4.50562	-9.66927	-5.16364	3.19159	4.93195	0.002765	3.5599	2	1	1	1	1	PF3D7_0208000	PF3D7_0208000			0208000.1 0208000 serine repeat antigen 1 serine repeat antigen 1 Pf3D7_02_v3:322338-325723(-) 994
6	-4.80775	-6.47536	-1.66761	5.89666	7.10078	0.00093985	3.8537	3	1	2	1	2	PF3D7_1439700	PF3D7_1439700			1439700.1 1439700 leucine carboxyl methyltransferase, putative leucine carboxyl methyltransferase, putative Pf3D7_14_v3:1613853-1615542(-) 327
5	-4.97008	-9.39675	-4.42667	5.06524	7.16906	0	6.8455	3	1	4	1	4	PF3D7_0903400	PF3D7_0903400			0903400.1 0903400 ATP-dependent RNA helicase DDX60, putative ATP-dependent RNA helicase DDX60, putative Pf3D7_09_v3:151700-159541(-) 2536
4	-5.51026	-5.56857	-0.0583077	6.37321	6.85033	0.009106	2.4558	1	0	1	0	1	PF3D7_1252300	PF3D7_1252300			1252300.1 1252300 conserved Plasmodium protein, unknown function conserved Plasmodium protein, unknown function Pf3D7_12_v3:2128400-2128786(-) 85
3	-6.25725	-6.49064	-0.233397	6.3205	7.2236	0	6.0111	3	1	2	1	2	PF3D7_1246400	PF3D7_1246400			1246400.1 1246400 myosin A tail domain interacting protein myosin A tail domain interacting protein Pf3D7_12_v3:1931970-1932584(+) 204
2	-6.31051	-5.97897	0.331541	6.49056	7.72101	0	13.16	7	1	4	1	4	PF3D7_1003600	PF3D7_1003600			1003600.1 1003600 inner membrane complex protein 1c, putative inner membrane complex protein 1c, putative Pf3D7_10_v3:164945-165790(+) 281
1	-7.47701	-6.15408	1.32294	6.789	8.85346	0.0043178	2.8352	2	0	2	0	2	PF3D7_0520800	PF3D7_0520800			0520800.1 0520800 conserved Plasmodium protein, unknown function conserved Plasmodium protein, unknown function Pf3D7_05_v3:849862-856026(-) 2054
